# Supplementary material
Source: publisher figshare collection journal article supplement (https://gsajournals.figshare.com/ndownloader/files/26554157)
Supplement: Supplementary file 1 [file 26554157]

## Sheet: Simulation Results
Geno	Test	Fst*	Ancestries	Theta	Average Depth	Total # of variants	Number of significant variants					Proportion of significant variants
							p < 1e-5	p < 1e-4	p < .001	p < .01	p < .05	p < 1e-5	p < 1e-4	p < .001	p < .01	p < .05
GT	Unadjusted	0.01	1	-0.5	5	50000	42629	43355	44298	45364	46075	0.8526	0.8671	0.886	0.9073	0.9215
GT	Unadjusted	0.01	1	-0.1	5	50000	12306	15100	19180	26018	32928	0.2461	0.302	0.3836	0.5204	0.6586
GT	Unadjusted	0.01	1	-0.05	5	50000	1496	3106	6347	11730	17136	0.0299	0.0621	0.1269	0.2346	0.3427
GT	Unadjusted	0.01	1	-0.01	5	50000	1101	2995	7059	15048	23556	0.022	0.0599	0.1412	0.301	0.4711
GT	Unadjusted	0.01	1	0	5	50000	2716	5877	11448	19442	26102	0.0543	0.1175	0.229	0.3888	0.522
GT	Unadjusted	0.01	1	0.01	5	50000	5759	10343	16586	23292	28108	0.1152	0.2069	0.3317	0.4658	0.5622
GT	Unadjusted	0.01	1	0.05	5	50000	24193	27072	29205	31719	34654	0.4839	0.5414	0.5841	0.6344	0.6931
GT	Unadjusted	0.01	1	0.1	5	50000	32699	34940	37949	41569	44382	0.654	0.6988	0.759	0.8314	0.8876
GT	Unadjusted	0.01	1	0.5	5	50000	48882	49016	49133	49256	49300	0.9776	0.9803	0.9827	0.9851	0.986
GT	Unadjusted	0.01	2	-0.5	5	50000	41568	42353	43379	44538	45453	0.8314	0.8471	0.8676	0.8908	0.9091
GT	Unadjusted	0.01	2	-0.1	5	50000	10246	12966	16697	22734	29576	0.2049	0.2593	0.3339	0.4547	0.5915
GT	Unadjusted	0.01	2	-0.05	5	50000	1140	2543	5378	10927	17368	0.0228	0.0509	0.1076	0.2185	0.3474
GT	Unadjusted	0.01	2	-0.01	5	50000	2256	4782	9591	17456	25109	0.0451	0.0956	0.1918	0.3491	0.5022
GT	Unadjusted	0.01	2	0	5	50000	4637	8572	14293	21554	27269	0.0927	0.1714	0.2859	0.4311	0.5454
GT	Unadjusted	0.01	2	0.01	5	50000	8178	12983	18981	24878	28836	0.1636	0.2597	0.3796	0.4976	0.5767
GT	Unadjusted	0.01	2	0.05	5	50000	25552	27930	29982	32666	35791	0.511	0.5586	0.5996	0.6533	0.7158
GT	Unadjusted	0.01	2	0.1	5	50000	33532	35871	38912	42355	44890	0.6706	0.7174	0.7782	0.8471	0.8978
GT	Unadjusted	0.01	2	0.5	5	50000	48927	49060	49183	49308	49370	0.9785	0.9812	0.9837	0.9862	0.9874
GT	Unadjusted	0.01	5	-0.5	5	50000	40314	41271	42479	43793	44853	0.8063	0.8254	0.8496	0.8759	0.8971
GT	Unadjusted	0.01	5	-0.1	5	50000	8686	11440	14952	20767	27349	0.1737	0.2288	0.299	0.4153	0.547
GT	Unadjusted	0.01	5	-0.05	5	50000	867	1953	4473	9767	16415	0.0173	0.0391	0.0895	0.1953	0.3283
GT	Unadjusted	0.01	5	-0.01	5	50000	2478	5298	10405	18185	25406	0.0496	0.106	0.2081	0.3637	0.5081
GT	Unadjusted	0.01	5	0	5	50000	4928	9210	15243	22321	27655	0.0986	0.1842	0.3049	0.4464	0.5531
GT	Unadjusted	0.01	5	0.01	5	50000	8917	14157	20099	25599	29215	0.1783	0.2831	0.402	0.512	0.5843
GT	Unadjusted	0.01	5	0.05	5	50000	26067	28287	30362	33115	36440	0.5213	0.5657	0.6072	0.6623	0.7288
GT	Unadjusted	0.01	5	0.1	5	50000	34005	36437	39405	42828	45268	0.6801	0.7287	0.7881	0.8566	0.9054
GT	Unadjusted	0.01	5	0.5	5	50000	48963	49087	49222	49350	49411	0.9793	0.9817	0.9844	0.987	0.9882
GT	Unadjusted	0.01	10	-0.5	5	50000	39595	40547	41767	43244	44422	0.7919	0.8109	0.8353	0.8649	0.8884
GT	Unadjusted	0.01	10	-0.1	5	50000	7833	10545	14107	19933	26778	0.1567	0.2109	0.2821	0.3987	0.5356
GT	Unadjusted	0.01	10	-0.05	5	50000	783	1738	4049	9004	15615	0.0157	0.0348	0.081	0.1801	0.3123
GT	Unadjusted	0.01	10	-0.01	5	50000	2130	4988	10064	18149	25363	0.0426	0.0998	0.2013	0.363	0.5073
GT	Unadjusted	0.01	10	0	5	50000	4620	8777	14951	22254	27613	0.0924	0.1755	0.299	0.4451	0.5523
GT	Unadjusted	0.01	10	0.01	5	50000	8546	13747	20033	25736	29321	0.1709	0.2749	0.4007	0.5147	0.5864
GT	Unadjusted	0.01	10	0.05	5	50000	26056	28276	30326	33208	36383	0.5211	0.5655	0.6065	0.6642	0.7277
GT	Unadjusted	0.01	10	0.1	5	50000	34004	36430	39379	42765	45334	0.6801	0.7286	0.7876	0.8553	0.9067
GT	Unadjusted	0.01	10	0.5	5	50000	48955	49096	49231	49356	49421	0.9791	0.9819	0.9846	0.9871	0.9884
GT	Unadjusted	0.02	1	-0.5	5	50000	42588	43347	44280	45372	46069	0.8518	0.8669	0.8856	0.9074	0.9214
GT	Unadjusted	0.02	1	-0.1	5	50000	12251	15000	19070	25817	32789	0.245	0.3	0.3814	0.5163	0.6558
GT	Unadjusted	0.02	1	-0.05	5	50000	1474	3119	6404	11812	17379	0.0295	0.0624	0.1281	0.2362	0.3476
GT	Unadjusted	0.02	1	-0.01	5	50000	1124	3021	7202	15153	23781	0.0225	0.0604	0.144	0.3031	0.4756
GT	Unadjusted	0.02	1	0	5	50000	2806	6025	11604	19638	26328	0.0561	0.1205	0.2321	0.3928	0.5266
GT	Unadjusted	0.02	1	0.01	5	50000	5997	10541	16795	23598	28183	0.1199	0.2108	0.3359	0.472	0.5637
GT	Unadjusted	0.02	1	0.05	5	50000	24229	27102	29254	31653	34560	0.4846	0.542	0.5851	0.6331	0.6912
GT	Unadjusted	0.02	1	0.1	5	50000	32742	35046	38080	41709	44454	0.6548	0.7009	0.7616	0.8342	0.8891
GT	Unadjusted	0.02	1	0.5	5	50000	48839	48974	49103	49213	49260	0.9768	0.9795	0.9821	0.9843	0.9852
GT	Unadjusted	0.02	2	-0.5	5	50000	40677	41545	42636	43964	44912	0.8135	0.8309	0.8527	0.8793	0.8982
GT	Unadjusted	0.02	2	-0.1	5	50000	8881	11548	15147	20807	27079	0.1776	0.231	0.3029	0.4161	0.5416
GT	Unadjusted	0.02	2	-0.05	5	50000	1358	2714	5610	11305	17847	0.0272	0.0543	0.1122	0.2261	0.3569
GT	Unadjusted	0.02	2	-0.01	5	50000	3652	6600	11392	18904	25835	0.073	0.132	0.2278	0.3781	0.5167
GT	Unadjusted	0.02	2	0	5	50000	6334	10308	15835	22609	27990	0.1267	0.2062	0.3167	0.4522	0.5598
GT	Unadjusted	0.02	2	0.01	5	50000	10024	14753	20324	25789	29521	0.2005	0.2951	0.4065	0.5158	0.5904
GT	Unadjusted	0.02	2	0.05	5	50000	26210	28479	30440	33108	36247	0.5242	0.5696	0.6088	0.6622	0.7249
GT	Unadjusted	0.02	2	0.1	5	50000	33975	36244	39100	42446	44995	0.6795	0.7249	0.782	0.8489	0.8999
GT	Unadjusted	0.02	2	0.5	5	50000	48890	49028	49148	49283	49332	0.9778	0.9806	0.983	0.9857	0.9866
GT	Unadjusted	0.02	5	-0.5	5	50000	38434	39463	40762	42323	43562	0.7687	0.7893	0.8152	0.8465	0.8712
GT	Unadjusted	0.02	5	-0.1	5	50000	6283	8692	11882	16716	22356	0.1257	0.1738	0.2376	0.3343	0.4471
GT	Unadjusted	0.02	5	-0.05	5	50000	805	1898	4611	10534	17917	0.0161	0.038	0.0922	0.2107	0.3583
GT	Unadjusted	0.02	5	-0.01	5	50000	5266	9041	14638	21748	27305	0.1053	0.1808	0.2928	0.435	0.5461
GT	Unadjusted	0.02	5	0	5	50000	8825	13443	18955	24825	29059	0.1765	0.2689	0.3791	0.4965	0.5812
GT	Unadjusted	0.02	5	0.01	5	50000	13077	18035	23091	27452	30487	0.2615	0.3607	0.4618	0.549	0.6097
GT	Unadjusted	0.02	5	0.05	5	50000	27550	29457	31427	34511	37841	0.551	0.5891	0.6285	0.6902	0.7568
GT	Unadjusted	0.02	5	0.1	5	50000	35170	37498	40232	43371	45621	0.7034	0.75	0.8046	0.8674	0.9124
GT	Unadjusted	0.02	5	0.5	5	50000	48903	49061	49188	49310	49373	0.9781	0.9812	0.9838	0.9862	0.9875
GT	Unadjusted	0.02	10	-0.5	5	50000	37086	38199	39601	41315	42794	0.7417	0.764	0.792	0.8263	0.8559
GT	Unadjusted	0.02	10	-0.1	5	50000	5249	7486	10405	14808	20351	0.105	0.1497	0.2081	0.2962	0.407
GT	Unadjusted	0.02	10	-0.05	5	50000	580	1488	3901	9875	18017	0.0116	0.0298	0.078	0.1975	0.3603
GT	Unadjusted	0.02	10	-0.01	5	50000	5568	9760	15712	22539	27850	0.1114	0.1952	0.3142	0.4508	0.557
GT	Unadjusted	0.02	10	0	5	50000	9368	14329	20120	25682	29316	0.1874	0.2866	0.4024	0.5136	0.5863
GT	Unadjusted	0.02	10	0.01	5	50000	13988	19020	23904	27977	30708	0.2798	0.3804	0.4781	0.5595	0.6142
GT	Unadjusted	0.02	10	0.05	5	50000	28022	29646	31587	34774	38177	0.5604	0.5929	0.6317	0.6955	0.7635
GT	Unadjusted	0.02	10	0.1	5	50000	35160	37576	40470	43594	45786	0.7032	0.7515	0.8094	0.8719	0.9157
GT	Unadjusted	0.02	10	0.5	5	50000	48923	49073	49213	49332	49391	0.9785	0.9815	0.9843	0.9866	0.9878
GT	Unadjusted	0.03	1	-0.5	5	50000	42633	43324	44299	45379	46093	0.8527	0.8665	0.886	0.9076	0.9219
GT	Unadjusted	0.03	1	-0.1	5	50000	12450	15210	19241	25989	33012	0.249	0.3042	0.3848	0.5198	0.6602
GT	Unadjusted	0.03	1	-0.05	5	50000	1379	3013	6357	11631	17093	0.0276	0.0603	0.1271	0.2326	0.3419
GT	Unadjusted	0.03	1	-0.01	5	50000	1144	3068	7276	15221	23585	0.0229	0.0614	0.1455	0.3044	0.4717
GT	Unadjusted	0.03	1	0	5	50000	2760	5968	11531	19448	26036	0.0552	0.1194	0.2306	0.389	0.5207
GT	Unadjusted	0.03	1	0.01	5	50000	5813	10400	16675	23366	28143	0.1163	0.208	0.3335	0.4673	0.5629
GT	Unadjusted	0.03	1	0.05	5	50000	24290	27151	29325	31847	34772	0.4858	0.543	0.5865	0.6369	0.6954
GT	Unadjusted	0.03	1	0.1	5	50000	32857	35252	38287	41889	44659	0.6571	0.705	0.7657	0.8378	0.8932
GT	Unadjusted	0.03	1	0.5	5	50000	48837	48972	49102	49196	49243	0.9767	0.9794	0.982	0.9839	0.9849
GT	Unadjusted	0.03	2	-0.5	5	50000	39894	40816	41910	43300	44325	0.7979	0.8163	0.8382	0.866	0.8865
GT	Unadjusted	0.03	2	-0.1	5	50000	8141	10677	14037	19321	25317	0.1628	0.2135	0.2807	0.3864	0.5063
GT	Unadjusted	0.03	2	-0.05	5	50000	2065	3678	6971	12900	19668	0.0413	0.0736	0.1394	0.258	0.3934
GT	Unadjusted	0.03	2	-0.01	5	50000	5945	9139	13986	20960	27177	0.1189	0.1828	0.2797	0.4192	0.5435
GT	Unadjusted	0.03	2	0	5	50000	8803	12862	18094	24144	28911	0.1761	0.2572	0.3619	0.4829	0.5782
GT	Unadjusted	0.03	2	0.01	5	50000	12421	16953	22111	26988	30395	0.2484	0.3391	0.4422	0.5398	0.6079
GT	Unadjusted	0.03	2	0.05	5	50000	27007	29170	31081	33687	36664	0.5401	0.5834	0.6216	0.6737	0.7333
GT	Unadjusted	0.03	2	0.1	5	50000	34213	36486	39149	42409	44871	0.6843	0.7297	0.783	0.8482	0.8974
GT	Unadjusted	0.03	2	0.5	5	50000	48869	48997	49117	49226	49290	0.9774	0.9799	0.9823	0.9845	0.9858
GT	Unadjusted	0.03	5	-0.5	5	50000	36772	37842	39166	40903	42292	0.7354	0.7568	0.7833	0.8181	0.8458
GT	Unadjusted	0.03	5	-0.1	5	50000	4907	7014	9917	14472	20045	0.0981	0.1403	0.1983	0.2894	0.4009
GT	Unadjusted	0.03	5	-0.05	5	50000	1391	2690	5535	11448	19005	0.0278	0.0538	0.1107	0.229	0.3801
GT	Unadjusted	0.03	5	-0.01	5	50000	7733	11827	17141	23354	28444	0.1547	0.2365	0.3428	0.4671	0.5689
GT	Unadjusted	0.03	5	0	5	50000	11282	15925	21152	26387	30153	0.2256	0.3185	0.423	0.5277	0.6031
GT	Unadjusted	0.03	5	0.01	5	50000	15359	20004	24629	28729	31824	0.3072	0.4001	0.4926	0.5746	0.6365
GT	Unadjusted	0.03	5	0.05	5	50000	28575	30473	32670	35786	38946	0.5715	0.6095	0.6534	0.7157	0.7789
GT	Unadjusted	0.03	5	0.1	5	50000	36088	38476	41165	44046	46084	0.7218	0.7695	0.8233	0.8809	0.9217
GT	Unadjusted	0.03	5	0.5	5	50000	48920	49049	49186	49294	49357	0.9784	0.981	0.9837	0.9859	0.9871
GT	Unadjusted	0.03	10	-0.5	5	50000	34827	35915	37360	39198	40812	0.6965	0.7183	0.7472	0.784	0.8162
GT	Unadjusted	0.03	10	-0.1	5	50000	3520	5329	7938	11814	16692	0.0704	0.1066	0.1588	0.2363	0.3338
GT	Unadjusted	0.03	10	-0.05	5	50000	1038	2474	5593	12465	20592	0.0208	0.0495	0.1119	0.2493	0.4118
GT	Unadjusted	0.03	10	-0.01	5	50000	10024	14643	19970	25498	29411	0.2005	0.2929	0.3994	0.51	0.5882
GT	Unadjusted	0.03	10	0	5	50000	13993	18860	23567	27780	30770	0.2799	0.3772	0.4713	0.5556	0.6154
GT	Unadjusted	0.03	10	0.01	5	50000	18486	22684	26442	29560	32140	0.3697	0.4537	0.5288	0.5912	0.6428
GT	Unadjusted	0.03	10	0.05	5	50000	29223	30807	33025	36379	39693	0.5845	0.6161	0.6605	0.7276	0.7939
GT	Unadjusted	0.03	10	0.1	5	50000	36602	38958	41630	44472	46349	0.732	0.7792	0.8326	0.8894	0.927
GT	Unadjusted	0.03	10	0.5	5	50000	48910	49052	49191	49319	49383	0.9782	0.981	0.9838	0.9864	0.9877
GT	Unadjusted	0.05	1	-0.5	5	50000	42649	43352	44330	45388	46090	0.853	0.867	0.8866	0.9078	0.9218
GT	Unadjusted	0.05	1	-0.1	5	50000	12191	14920	18969	25699	32694	0.2438	0.2984	0.3794	0.514	0.6539
GT	Unadjusted	0.05	1	-0.05	5	50000	1422	3078	6350	11665	17064	0.0284	0.0616	0.127	0.2333	0.3413
GT	Unadjusted	0.05	1	-0.01	5	50000	1118	2978	7048	15244	23835	0.0224	0.0596	0.141	0.3049	0.4767
GT	Unadjusted	0.05	1	0	5	50000	2725	5924	11519	19535	26296	0.0545	0.1185	0.2304	0.3907	0.5259
GT	Unadjusted	0.05	1	0.01	5	50000	5727	10305	16585	23519	28156	0.1145	0.2061	0.3317	0.4704	0.5631
GT	Unadjusted	0.05	1	0.05	5	50000	24210	27060	29269	31631	34543	0.4842	0.5412	0.5854	0.6326	0.6909
GT	Unadjusted	0.05	1	0.1	5	50000	32763	35044	37953	41528	44301	0.6553	0.7009	0.7591	0.8306	0.886
GT	Unadjusted	0.05	1	0.5	5	50000	48841	48975	49073	49184	49235	0.9768	0.9795	0.9815	0.9837	0.9847
GT	Unadjusted	0.05	2	-0.5	5	50000	38494	39500	40696	42186	43442	0.7699	0.79	0.8139	0.8437	0.8688
GT	Unadjusted	0.05	2	-0.1	5	50000	7705	10154	13565	18961	24906	0.1541	0.2031	0.2713	0.3792	0.4981
GT	Unadjusted	0.05	2	-0.05	5	50000	3699	5488	8724	14375	20788	0.074	0.1098	0.1745	0.2875	0.4158
GT	Unadjusted	0.05	2	-0.01	5	50000	8751	11866	16386	22745	28363	0.175	0.2373	0.3277	0.4549	0.5673
GT	Unadjusted	0.05	2	0	5	50000	11596	15352	20139	25653	30009	0.2319	0.307	0.4028	0.5131	0.6002
GT	Unadjusted	0.05	2	0.01	5	50000	14898	18976	23624	28232	31479	0.298	0.3795	0.4725	0.5646	0.6296
GT	Unadjusted	0.05	2	0.05	5	50000	28164	30199	32195	34893	37773	0.5633	0.604	0.6439	0.6979	0.7555
GT	Unadjusted	0.05	2	0.1	5	50000	35392	37587	40192	43200	45445	0.7078	0.7517	0.8038	0.864	0.9089
GT	Unadjusted	0.05	2	0.5	5	50000	48858	48983	49108	49208	49254	0.9772	0.9797	0.9822	0.9842	0.9851
GT	Unadjusted	0.05	5	-0.5	5	50000	33955	35109	36632	38568	40357	0.6791	0.7022	0.7326	0.7714	0.8071
GT	Unadjusted	0.05	5	-0.1	5	50000	3866	5675	8585	13193	18763	0.0773	0.1135	0.1717	0.2639	0.3753
GT	Unadjusted	0.05	5	-0.05	5	50000	4522	6725	10344	16596	23367	0.0904	0.1345	0.2069	0.3319	0.4673
GT	Unadjusted	0.05	5	-0.01	5	50000	13899	17813	22389	27229	31067	0.278	0.3563	0.4478	0.5446	0.6213
GT	Unadjusted	0.05	5	0	5	50000	17407	21351	25495	29471	32558	0.3481	0.427	0.5099	0.5894	0.6512
GT	Unadjusted	0.05	5	0.01	5	50000	21050	24655	28104	31410	34174	0.421	0.4931	0.5621	0.6282	0.6835
GT	Unadjusted	0.05	5	0.05	5	50000	30847	32661	34972	38133	41157	0.6169	0.6532	0.6994	0.7627	0.8231
GT	Unadjusted	0.05	5	0.1	5	50000	37900	40099	42412	44824	46490	0.758	0.802	0.8482	0.8965	0.9298
GT	Unadjusted	0.05	5	0.5	5	50000	48930	49043	49171	49285	49333	0.9786	0.9809	0.9834	0.9857	0.9867
GT	Unadjusted	0.05	10	-0.5	5	50000	31310	32429	33976	36127	38220	0.6262	0.6486	0.6795	0.7225	0.7644
GT	Unadjusted	0.05	10	-0.1	5	50000	2154	3629	6100	10600	16068	0.0431	0.0726	0.122	0.212	0.3214
GT	Unadjusted	0.05	10	-0.05	5	50000	4846	7744	12191	18791	25338	0.0969	0.1549	0.2438	0.3758	0.5068
GT	Unadjusted	0.05	10	-0.01	5	50000	17569	21533	25498	29237	32349	0.3514	0.4307	0.51	0.5847	0.647
GT	Unadjusted	0.05	10	0	5	50000	21121	24614	27809	31031	33822	0.4224	0.4923	0.5562	0.6206	0.6764
GT	Unadjusted	0.05	10	0.01	5	50000	24369	27091	29835	32693	35506	0.4874	0.5418	0.5967	0.6539	0.7101
GT	Unadjusted	0.05	10	0.05	5	50000	31784	33812	36311	39667	42501	0.6357	0.6762	0.7262	0.7933	0.85
GT	Unadjusted	0.05	10	0.1	5	50000	39223	41268	43373	45608	47134	0.7845	0.8254	0.8675	0.9122	0.9427
GT	Unadjusted	0.05	10	0.5	5	50000	48920	49058	49194	49312	49374	0.9784	0.9812	0.9839	0.9862	0.9875
GT	Unadjusted	0.1	1	-0.5	5	50000	42674	43359	44249	45379	46087	0.8535	0.8672	0.885	0.9076	0.9217
GT	Unadjusted	0.1	1	-0.1	5	50000	12219	15026	19127	25992	32950	0.2444	0.3005	0.3825	0.5198	0.659
GT	Unadjusted	0.1	1	-0.05	5	50000	1473	3098	6393	11706	17084	0.0295	0.062	0.1279	0.2341	0.3417
GT	Unadjusted	0.1	1	-0.01	5	50000	1117	2939	6934	14892	23473	0.0223	0.0588	0.1387	0.2978	0.4695
GT	Unadjusted	0.1	1	0	5	50000	2548	5718	11246	19290	26243	0.051	0.1144	0.2249	0.3858	0.5249
GT	Unadjusted	0.1	1	0.01	5	50000	5523	10159	16419	23423	28083	0.1105	0.2032	0.3284	0.4685	0.5617
GT	Unadjusted	0.1	1	0.05	5	50000	23928	26877	29131	31696	34678	0.4786	0.5375	0.5826	0.6339	0.6936
GT	Unadjusted	0.1	1	0.1	5	50000	32624	34833	37849	41492	44312	0.6525	0.6967	0.757	0.8298	0.8862
GT	Unadjusted	0.1	1	0.5	5	50000	48854	48965	49078	49155	49203	0.9771	0.9793	0.9816	0.9831	0.9841
GT	Unadjusted	0.1	2	-0.5	5	50000	36171	37279	38670	40501	42035	0.7234	0.7456	0.7734	0.81	0.8407
GT	Unadjusted	0.1	2	-0.1	5	50000	10025	12396	15733	20830	26446	0.2005	0.2479	0.3147	0.4166	0.5289
GT	Unadjusted	0.1	2	-0.05	5	50000	8936	10811	13763	18735	24230	0.1787	0.2162	0.2753	0.3747	0.4846
GT	Unadjusted	0.1	2	-0.01	5	50000	14434	17215	20934	26088	30768	0.2887	0.3443	0.4187	0.5218	0.6154
GT	Unadjusted	0.1	2	0	5	50000	16828	19958	23975	28581	32352	0.3366	0.3992	0.4795	0.5716	0.647
GT	Unadjusted	0.1	2	0.01	5	50000	19704	23233	27103	30948	33846	0.3941	0.4647	0.5421	0.619	0.6769
GT	Unadjusted	0.1	2	0.05	5	50000	30766	32684	34697	37311	39972	0.6153	0.6537	0.6939	0.7462	0.7994
GT	Unadjusted	0.1	2	0.1	5	50000	37493	39473	41679	44236	46116	0.7499	0.7895	0.8336	0.8847	0.9223
GT	Unadjusted	0.1	2	0.5	5	50000	48865	48977	49074	49170	49208	0.9773	0.9795	0.9815	0.9834	0.9842
GT	Unadjusted	0.1	5	-0.5	5	50000	30649	32108	33980	36462	38853	0.613	0.6422	0.6796	0.7292	0.7771
GT	Unadjusted	0.1	5	-0.1	5	50000	9804	12122	15381	20263	25390	0.1961	0.2424	0.3076	0.4053	0.5078
GT	Unadjusted	0.1	5	-0.05	5	50000	15841	18591	22106	26884	31401	0.3168	0.3718	0.4421	0.5377	0.628
GT	Unadjusted	0.1	5	-0.01	5	50000	24579	27247	30298	33411	36085	0.4916	0.5449	0.606	0.6682	0.7217
GT	Unadjusted	0.1	5	0	5	50000	26981	29484	32034	34806	37241	0.5396	0.5897	0.6407	0.6961	0.7448
GT	Unadjusted	0.1	5	0.01	5	50000	29061	31410	33611	36208	38590	0.5812	0.6282	0.6722	0.7242	0.7718
GT	Unadjusted	0.1	5	0.05	5	50000	35102	36842	38929	41444	43669	0.702	0.7368	0.7786	0.8289	0.8734
GT	Unadjusted	0.1	5	0.1	5	50000	40757	42361	44052	45902	47173	0.8151	0.8472	0.881	0.918	0.9435
GT	Unadjusted	0.1	5	0.5	5	50000	48904	49010	49118	49231	49289	0.9781	0.9802	0.9824	0.9846	0.9858
GT	Unadjusted	0.1	10	-0.5	5	50000	28104	29942	32296	35347	38096	0.5621	0.5988	0.6459	0.7069	0.7619
GT	Unadjusted	0.1	10	-0.1	5	50000	10617	13405	17279	22657	28075	0.2123	0.2681	0.3456	0.4531	0.5615
GT	Unadjusted	0.1	10	-0.05	5	50000	19998	23287	26952	31239	34899	0.4	0.4657	0.539	0.6248	0.698
GT	Unadjusted	0.1	10	-0.01	5	50000	28862	31143	33559	36335	38865	0.5772	0.6229	0.6712	0.7267	0.7773
GT	Unadjusted	0.1	10	0	5	50000	30585	32647	34837	37414	39835	0.6117	0.6529	0.6967	0.7483	0.7967
GT	Unadjusted	0.1	10	0.01	5	50000	32216	34162	36319	38916	41181	0.6443	0.6832	0.7264	0.7783	0.8236
GT	Unadjusted	0.1	10	0.05	5	50000	37281	39113	41192	43592	45359	0.7456	0.7823	0.8238	0.8718	0.9072
GT	Unadjusted	0.1	10	0.1	5	50000	42516	43861	45355	46811	47779	0.8503	0.8772	0.9071	0.9362	0.9556
GT	Unadjusted	0.1	10	0.5	5	50000	48949	49062	49181	49280	49338	0.979	0.9812	0.9836	0.9856	0.9868
GT	Unadjusted	Combined	1	-0.5	5	250000	213173	216737	221456	226882	230414	0.8527	0.8669	0.8858	0.9075	0.9217
GT	Unadjusted	Combined	1	-0.1	5	250000	61417	75256	95587	129515	164373	0.2457	0.301	0.3823	0.5181	0.6575
GT	Unadjusted	Combined	1	-0.05	5	250000	7244	15414	31851	58544	85756	0.029	0.0617	0.1274	0.2342	0.343
GT	Unadjusted	Combined	1	-0.01	5	250000	5604	15001	35519	75558	118230	0.0224	0.06	0.1421	0.3022	0.4729
GT	Unadjusted	Combined	1	0	5	250000	13555	29512	57348	97353	131005	0.0542	0.118	0.2294	0.3894	0.524
GT	Unadjusted	Combined	1	0.01	5	250000	28819	51748	83060	117198	140673	0.1153	0.207	0.3322	0.4688	0.5627
GT	Unadjusted	Combined	1	0.05	5	250000	120850	135262	146184	158546	173207	0.4834	0.541	0.5847	0.6342	0.6928
GT	Unadjusted	Combined	1	0.1	5	250000	163685	175115	190118	208187	222108	0.6547	0.7005	0.7605	0.8327	0.8884
GT	Unadjusted	Combined	1	0.5	5	250000	244253	244902	245489	246004	246241	0.977	0.9796	0.982	0.984	0.985
GT	Unadjusted	0.01	1	-0.5	30	50000	44916	45364	45948	46604	47102	0.8983	0.9073	0.919	0.9321	0.942
GT	Unadjusted	0.01	1	-0.1	30	50000	44256	45214	45925	46581	47088	0.8851	0.9043	0.9185	0.9316	0.9418
GT	Unadjusted	0.01	1	-0.05	30	50000	4724	10872	20953	33544	41574	0.0945	0.2174	0.4191	0.6709	0.8315
GT	Unadjusted	0.01	1	-0.01	30	50000	1	11	88	767	3112	0	0.0002	0.0018	0.0153	0.0622
GT	Unadjusted	0.01	1	0	30	50000	4	13	81	681	2921	0.0001	0.0003	0.0016	0.0136	0.0584
GT	Unadjusted	0.01	1	0.01	30	50000	21	116	542	2716	7854	0.0004	0.0023	0.0108	0.0543	0.1571
GT	Unadjusted	0.01	1	0.05	30	50000	10151	18383	29141	39758	45381	0.203	0.3677	0.5828	0.7952	0.9076
GT	Unadjusted	0.01	1	0.1	30	50000	46734	47985	48775	49264	49485	0.9347	0.9597	0.9755	0.9853	0.9897
GT	Unadjusted	0.01	1	0.5	30	50000	49718	49732	49794	49820	49823	0.9944	0.9946	0.9959	0.9964	0.9965
GT	Unadjusted	0.01	2	-0.5	30	50000	43712	44221	44913	45673	46322	0.8742	0.8844	0.8983	0.9135	0.9264
GT	Unadjusted	0.01	2	-0.1	30	50000	40838	42860	44395	45516	46251	0.8168	0.8572	0.8879	0.9103	0.925
GT	Unadjusted	0.01	2	-0.05	30	50000	2977	7122	14884	26520	35755	0.0595	0.1424	0.2977	0.5304	0.7151
GT	Unadjusted	0.01	2	-0.01	30	50000	34	79	255	1143	3749	0.0007	0.0016	0.0051	0.0229	0.075
GT	Unadjusted	0.01	2	0	30	50000	76	195	624	2207	5912	0.0015	0.0039	0.0125	0.0441	0.1182
GT	Unadjusted	0.01	2	0.01	30	50000	270	725	1982	6032	12870	0.0054	0.0145	0.0396	0.1206	0.2574
GT	Unadjusted	0.01	2	0.05	30	50000	15214	23694	33300	42100	46398	0.3043	0.4739	0.666	0.842	0.928
GT	Unadjusted	0.01	2	0.1	30	50000	47052	48106	48817	49268	49495	0.941	0.9621	0.9763	0.9854	0.9899
GT	Unadjusted	0.01	2	0.5	30	50000	49744	49762	49820	49857	49861	0.9949	0.9952	0.9964	0.9971	0.9972
GT	Unadjusted	0.01	5	-0.5	30	50000	42624	43205	43950	44824	45586	0.8525	0.8641	0.879	0.8965	0.9117
GT	Unadjusted	0.01	5	-0.1	30	50000	38511	41446	43387	44698	45548	0.7702	0.8289	0.8677	0.894	0.911
GT	Unadjusted	0.01	5	-0.05	30	50000	1583	4331	10545	21436	31652	0.0317	0.0866	0.2109	0.4287	0.633
GT	Unadjusted	0.01	5	-0.01	30	50000	5	31	174	1015	3655	0.0001	0.0006	0.0035	0.0203	0.0731
GT	Unadjusted	0.01	5	0	30	50000	43	190	676	2865	7631	0.0009	0.0038	0.0135	0.0573	0.1526
GT	Unadjusted	0.01	5	0.01	30	50000	224	844	2636	7956	16176	0.0045	0.0169	0.0527	0.1591	0.3235
GT	Unadjusted	0.01	5	0.05	30	50000	18039	26745	35997	43581	47065	0.3608	0.5349	0.7199	0.8716	0.9413
GT	Unadjusted	0.01	5	0.1	30	50000	47333	48263	48921	49351	49568	0.9467	0.9653	0.9784	0.987	0.9914
GT	Unadjusted	0.01	5	0.5	30	50000	49805	49819	49868	49895	49899	0.9961	0.9964	0.9974	0.9979	0.998
GT	Unadjusted	0.01	10	-0.5	30	50000	41960	42562	43340	44276	45117	0.8392	0.8512	0.8668	0.8855	0.9023
GT	Unadjusted	0.01	10	-0.1	30	50000	38466	41241	42938	44196	45138	0.7693	0.8248	0.8588	0.8839	0.9028
GT	Unadjusted	0.01	10	-0.05	30	50000	1376	3874	9722	20878	31302	0.0275	0.0775	0.1944	0.4176	0.626
GT	Unadjusted	0.01	10	-0.01	30	50000	4	21	120	845	3373	0.0001	0.0004	0.0024	0.0169	0.0675
GT	Unadjusted	0.01	10	0	30	50000	18	109	591	2665	7594	0.0004	0.0022	0.0118	0.0533	0.1519
GT	Unadjusted	0.01	10	0.01	30	50000	174	657	2411	7958	16653	0.0035	0.0131	0.0482	0.1592	0.3331
GT	Unadjusted	0.01	10	0.05	30	50000	18839	27701	37047	44305	47569	0.3768	0.554	0.7409	0.8861	0.9514
GT	Unadjusted	0.01	10	0.1	30	50000	47597	48411	48982	49400	49602	0.9519	0.9682	0.9796	0.988	0.992
GT	Unadjusted	0.01	10	0.5	30	50000	49846	49865	49913	49936	49937	0.9969	0.9973	0.9983	0.9987	0.9987
GT	Unadjusted	0.02	1	-0.5	30	50000	44930	45394	45939	46582	47099	0.8986	0.9079	0.9188	0.9316	0.942
GT	Unadjusted	0.02	1	-0.1	30	50000	44154	45197	45930	46577	47103	0.8831	0.9039	0.9186	0.9315	0.9421
GT	Unadjusted	0.02	1	-0.05	30	50000	4657	10775	20791	33446	41539	0.0931	0.2155	0.4158	0.6689	0.8308
GT	Unadjusted	0.02	1	-0.01	30	50000	1	9	110	808	3288	0	0.0002	0.0022	0.0162	0.0658
GT	Unadjusted	0.02	1	0	30	50000	1	11	80	732	3053	0	0.0002	0.0016	0.0146	0.0611
GT	Unadjusted	0.02	1	0.01	30	50000	12	87	536	2856	8214	0.0002	0.0017	0.0107	0.0571	0.1643
GT	Unadjusted	0.02	1	0.05	30	50000	10205	18284	28901	39625	45286	0.2041	0.3657	0.578	0.7925	0.9057
GT	Unadjusted	0.02	1	0.1	30	50000	46667	47860	48654	49150	49404	0.9333	0.9572	0.9731	0.983	0.9881
GT	Unadjusted	0.02	1	0.5	30	50000	49639	49655	49740	49775	49776	0.9928	0.9931	0.9948	0.9955	0.9955
GT	Unadjusted	0.02	2	-0.5	30	50000	42981	43520	44200	45037	45764	0.8596	0.8704	0.884	0.9007	0.9153
GT	Unadjusted	0.02	2	-0.1	30	50000	36981	39763	41987	43860	45090	0.7396	0.7953	0.8397	0.8772	0.9018
GT	Unadjusted	0.02	2	-0.05	30	50000	2313	5612	12166	22424	31434	0.0463	0.1122	0.2433	0.4485	0.6287
GT	Unadjusted	0.02	2	-0.01	30	50000	453	728	1321	2896	6250	0.0091	0.0146	0.0264	0.0579	0.125
GT	Unadjusted	0.02	2	0	30	50000	809	1352	2442	5132	9710	0.0162	0.027	0.0488	0.1026	0.1942
GT	Unadjusted	0.02	2	0.01	30	50000	1533	2460	4634	9705	16989	0.0307	0.0492	0.0927	0.1941	0.3398
GT	Unadjusted	0.02	2	0.05	30	50000	18911	26866	35338	43019	46873	0.3782	0.5373	0.7068	0.8604	0.9375
GT	Unadjusted	0.02	2	0.1	30	50000	47261	48196	48843	49258	49460	0.9452	0.9639	0.9769	0.9852	0.9892
GT	Unadjusted	0.02	2	0.5	30	50000	49693	49708	49778	49812	49816	0.9939	0.9942	0.9956	0.9962	0.9963
GT	Unadjusted	0.02	5	-0.5	30	50000	41167	41823	42642	43657	44607	0.8233	0.8365	0.8528	0.8731	0.8921
GT	Unadjusted	0.02	5	-0.1	30	50000	31256	35802	39400	42242	43993	0.6251	0.716	0.788	0.8448	0.8799
GT	Unadjusted	0.02	5	-0.05	30	50000	861	2490	6283	14419	23449	0.0172	0.0498	0.1257	0.2884	0.469
GT	Unadjusted	0.02	5	-0.01	30	50000	269	580	1421	3754	8193	0.0054	0.0116	0.0284	0.0751	0.1639
GT	Unadjusted	0.02	5	0	30	50000	714	1499	3386	7907	14709	0.0143	0.03	0.0677	0.1581	0.2942
GT	Unadjusted	0.02	5	0.01	30	50000	1686	3559	7341	15075	24153	0.0337	0.0712	0.1468	0.3015	0.4831
GT	Unadjusted	0.02	5	0.05	30	50000	25612	33061	40257	45679	47994	0.5122	0.6612	0.8051	0.9136	0.9599
GT	Unadjusted	0.02	5	0.1	30	50000	47794	48511	49018	49357	49539	0.9559	0.9702	0.9804	0.9871	0.9908
GT	Unadjusted	0.02	5	0.5	30	50000	49770	49787	49834	49866	49868	0.9954	0.9957	0.9967	0.9973	0.9974
GT	Unadjusted	0.02	10	-0.5	30	50000	40156	40811	41639	42688	43788	0.8031	0.8162	0.8328	0.8538	0.8758
GT	Unadjusted	0.02	10	-0.1	30	50000	29559	34810	38937	41814	43451	0.5912	0.6962	0.7787	0.8363	0.869
GT	Unadjusted	0.02	10	-0.05	30	50000	437	1434	4382	11351	20390	0.0087	0.0287	0.0876	0.227	0.4078
GT	Unadjusted	0.02	10	-0.01	30	50000	108	296	1023	3386	8174	0.0022	0.0059	0.0205	0.0677	0.1635
GT	Unadjusted	0.02	10	0	30	50000	370	1007	2956	8381	16098	0.0074	0.0201	0.0591	0.1676	0.322
GT	Unadjusted	0.02	10	0.01	30	50000	1311	3226	7511	16235	26326	0.0262	0.0645	0.1502	0.3247	0.5265
GT	Unadjusted	0.02	10	0.05	30	50000	27376	34916	41691	46466	48394	0.5475	0.6983	0.8338	0.9293	0.9679
GT	Unadjusted	0.02	10	0.1	30	50000	47972	48596	49049	49385	49577	0.9594	0.9719	0.981	0.9877	0.9915
GT	Unadjusted	0.02	10	0.5	30	50000	49814	49828	49880	49904	49908	0.9963	0.9966	0.9976	0.9981	0.9982
GT	Unadjusted	0.03	1	-0.5	30	50000	44919	45364	45949	46563	47071	0.8984	0.9073	0.919	0.9313	0.9414
GT	Unadjusted	0.03	1	-0.1	30	50000	44223	45199	45904	46558	47067	0.8845	0.904	0.9181	0.9312	0.9413
GT	Unadjusted	0.03	1	-0.05	30	50000	4745	10768	20859	33659	41585	0.0949	0.2154	0.4172	0.6732	0.8317
GT	Unadjusted	0.03	1	-0.01	30	50000	1	9	96	810	3257	0	0.0002	0.0019	0.0162	0.0651
GT	Unadjusted	0.03	1	0	30	50000	4	14	88	662	2872	0.0001	0.0003	0.0018	0.0132	0.0574
GT	Unadjusted	0.03	1	0.01	30	50000	15	91	520	2699	7922	0.0003	0.0018	0.0104	0.054	0.1584
GT	Unadjusted	0.03	1	0.05	30	50000	10204	18462	28933	39786	45381	0.2041	0.3692	0.5787	0.7957	0.9076
GT	Unadjusted	0.03	1	0.1	30	50000	46688	47863	48652	49112	49331	0.9338	0.9573	0.973	0.9822	0.9866
GT	Unadjusted	0.03	1	0.5	30	50000	49583	49602	49692	49726	49729	0.9917	0.992	0.9938	0.9945	0.9946
GT	Unadjusted	0.03	2	-0.5	30	50000	42292	42908	43636	44605	45482	0.8458	0.8582	0.8727	0.8921	0.9096
GT	Unadjusted	0.03	2	-0.1	30	50000	33608	36707	39454	41854	43660	0.6722	0.7341	0.7891	0.8371	0.8732
GT	Unadjusted	0.03	2	-0.05	30	50000	2221	5242	11159	20786	29388	0.0444	0.1048	0.2232	0.4157	0.5878
GT	Unadjusted	0.03	2	-0.01	30	50000	1499	2115	3098	5343	9013	0.03	0.0423	0.062	0.1069	0.1803
GT	Unadjusted	0.03	2	0	30	50000	2222	3182	4805	8081	13062	0.0444	0.0636	0.0961	0.1616	0.2612
GT	Unadjusted	0.03	2	0.01	30	50000	3474	4998	7700	13032	20146	0.0695	0.1	0.154	0.2606	0.4029
GT	Unadjusted	0.03	2	0.05	30	50000	21681	29014	37047	43867	47114	0.4336	0.5803	0.7409	0.8773	0.9423
GT	Unadjusted	0.03	2	0.1	30	50000	47394	48241	48856	49238	49444	0.9479	0.9648	0.9771	0.9848	0.9889
GT	Unadjusted	0.03	2	0.5	30	50000	49655	49674	49761	49779	49782	0.9931	0.9935	0.9952	0.9956	0.9956
GT	Unadjusted	0.03	5	-0.5	30	50000	40008	40712	41621	42746	43829	0.8002	0.8142	0.8324	0.8549	0.8766
GT	Unadjusted	0.03	5	-0.1	30	50000	24748	29669	34420	38601	41416	0.495	0.5934	0.6884	0.772	0.8283
GT	Unadjusted	0.03	5	-0.05	30	50000	691	1815	4486	10677	18532	0.0138	0.0363	0.0897	0.2135	0.3706
GT	Unadjusted	0.03	5	-0.01	30	50000	1456	2494	4416	8406	14096	0.0291	0.0499	0.0883	0.1681	0.2819
GT	Unadjusted	0.03	5	0	30	50000	2714	4510	7742	13831	21053	0.0543	0.0902	0.1548	0.2766	0.4211
GT	Unadjusted	0.03	5	0.01	30	50000	5009	8022	13129	21549	29918	0.1002	0.1604	0.2626	0.431	0.5984
GT	Unadjusted	0.03	5	0.05	30	50000	30684	36994	42587	46625	48311	0.6137	0.7399	0.8517	0.9325	0.9662
GT	Unadjusted	0.03	5	0.1	30	50000	48066	48626	49086	49391	49567	0.9613	0.9725	0.9817	0.9878	0.9913
GT	Unadjusted	0.03	5	0.5	30	50000	49760	49780	49822	49849	49852	0.9952	0.9956	0.9964	0.997	0.997
GT	Unadjusted	0.03	10	-0.5	30	50000	38646	39392	40368	41633	42913	0.7729	0.7878	0.8074	0.8327	0.8583
GT	Unadjusted	0.03	10	-0.1	30	50000	20622	26581	32499	37676	40971	0.4124	0.5316	0.65	0.7535	0.8194
GT	Unadjusted	0.03	10	-0.05	30	50000	282	804	2426	6947	13960	0.0056	0.0161	0.0485	0.1389	0.2792
GT	Unadjusted	0.03	10	-0.01	30	50000	866	1866	4079	9132	16046	0.0173	0.0373	0.0816	0.1826	0.3209
GT	Unadjusted	0.03	10	0	30	50000	2151	4248	8451	16110	24751	0.043	0.085	0.169	0.3222	0.495
GT	Unadjusted	0.03	10	0.01	30	50000	4900	8776	15095	25157	33901	0.098	0.1755	0.3019	0.5031	0.678
GT	Unadjusted	0.03	10	0.05	30	50000	34191	39982	44556	47577	48816	0.6838	0.7996	0.8911	0.9515	0.9763
GT	Unadjusted	0.03	10	0.1	30	50000	48281	48805	49174	49444	49586	0.9656	0.9761	0.9835	0.9889	0.9917
GT	Unadjusted	0.03	10	0.5	30	50000	49782	49800	49857	49883	49886	0.9956	0.996	0.9971	0.9977	0.9977
GT	Unadjusted	0.05	1	-0.5	30	50000	44899	45358	45926	46551	47064	0.898	0.9072	0.9185	0.931	0.9413
GT	Unadjusted	0.05	1	-0.1	30	50000	44120	45180	45950	46575	47084	0.8824	0.9036	0.919	0.9315	0.9417
GT	Unadjusted	0.05	1	-0.05	30	50000	4624	10625	20611	33283	41304	0.0925	0.2125	0.4122	0.6657	0.8261
GT	Unadjusted	0.05	1	-0.01	30	50000	2	12	79	754	3184	0	0.0002	0.0016	0.0151	0.0637
GT	Unadjusted	0.05	1	0	30	50000	4	13	87	719	3103	0.0001	0.0003	0.0017	0.0144	0.0621
GT	Unadjusted	0.05	1	0.01	30	50000	17	87	539	2788	8066	0.0003	0.0017	0.0108	0.0558	0.1613
GT	Unadjusted	0.05	1	0.05	30	50000	10246	18317	28989	39648	45155	0.2049	0.3663	0.5798	0.793	0.9031
GT	Unadjusted	0.05	1	0.1	30	50000	46569	47784	48620	49116	49332	0.9314	0.9557	0.9724	0.9823	0.9866
GT	Unadjusted	0.05	1	0.5	30	50000	49556	49570	49664	49688	49690	0.9911	0.9914	0.9933	0.9938	0.9938
GT	Unadjusted	0.05	2	-0.5	30	50000	41298	41953	42805	43833	44839	0.826	0.8391	0.8561	0.8767	0.8968
GT	Unadjusted	0.05	2	-0.1	30	50000	29057	32263	35445	38584	41040	0.5811	0.6453	0.7089	0.7717	0.8208
GT	Unadjusted	0.05	2	-0.05	30	50000	3394	6151	11385	19855	27798	0.0679	0.123	0.2277	0.3971	0.556
GT	Unadjusted	0.05	2	-0.01	30	50000	4446	5514	7146	9997	14012	0.0889	0.1103	0.1429	0.1999	0.2802
GT	Unadjusted	0.05	2	0	30	50000	5711	7196	9392	13206	18071	0.1142	0.1439	0.1878	0.2641	0.3614
GT	Unadjusted	0.05	2	0.01	30	50000	7448	9511	12645	18222	24712	0.149	0.1902	0.2529	0.3644	0.4942
GT	Unadjusted	0.05	2	0.05	30	50000	25818	32169	38924	44708	47463	0.5164	0.6434	0.7785	0.8942	0.9493
GT	Unadjusted	0.05	2	0.1	30	50000	47612	48383	48909	49241	49411	0.9522	0.9677	0.9782	0.9848	0.9882
GT	Unadjusted	0.05	2	0.5	30	50000	49588	49599	49702	49729	49733	0.9918	0.992	0.994	0.9946	0.9947
GT	Unadjusted	0.05	5	-0.5	30	50000	37995	38890	39939	41461	42925	0.7599	0.7778	0.7988	0.8292	0.8585
GT	Unadjusted	0.05	5	-0.1	30	50000	15269	19871	24966	30747	35367	0.3054	0.3974	0.4993	0.6149	0.7073
GT	Unadjusted	0.05	5	-0.05	30	50000	2065	3238	5602	10741	17318	0.0413	0.0648	0.112	0.2148	0.3464
GT	Unadjusted	0.05	5	-0.01	30	50000	6857	9321	12872	18468	24523	0.1371	0.1864	0.2574	0.3694	0.4905
GT	Unadjusted	0.05	5	0	30	50000	9627	12875	17370	24214	30835	0.1925	0.2575	0.3474	0.4843	0.6167
GT	Unadjusted	0.05	5	0.01	30	50000	13416	17546	23210	30854	37225	0.2683	0.3509	0.4642	0.6171	0.7445
GT	Unadjusted	0.05	5	0.05	30	50000	36877	41216	44899	47538	48675	0.7375	0.8243	0.898	0.9508	0.9735
GT	Unadjusted	0.05	5	0.1	30	50000	48203	48714	49082	49341	49513	0.9641	0.9743	0.9816	0.9868	0.9903
GT	Unadjusted	0.05	5	0.5	30	50000	49696	49713	49777	49816	49819	0.9939	0.9943	0.9955	0.9963	0.9964
GT	Unadjusted	0.05	10	-0.5	30	50000	36137	37104	38475	40312	42177	0.7227	0.7421	0.7695	0.8062	0.8435
GT	Unadjusted	0.05	10	-0.1	30	50000	9349	13880	19721	26943	32752	0.187	0.2776	0.3944	0.5389	0.655
GT	Unadjusted	0.05	10	-0.05	30	50000	1277	2141	3876	7802	13590	0.0255	0.0428	0.0775	0.156	0.2718
GT	Unadjusted	0.05	10	-0.01	30	50000	7010	10423	15550	23149	30246	0.1402	0.2085	0.311	0.463	0.6049
GT	Unadjusted	0.05	10	0	30	50000	10989	15488	21671	29897	36710	0.2198	0.3098	0.4334	0.5979	0.7342
GT	Unadjusted	0.05	10	0.01	30	50000	16422	21898	28807	36599	42145	0.3284	0.438	0.5761	0.732	0.8429
GT	Unadjusted	0.05	10	0.05	30	50000	41165	44322	46823	48362	49042	0.8233	0.8864	0.9365	0.9672	0.9808
GT	Unadjusted	0.05	10	0.1	30	50000	48534	48895	49211	49429	49574	0.9707	0.9779	0.9842	0.9886	0.9915
GT	Unadjusted	0.05	10	0.5	30	50000	49751	49767	49814	49848	49848	0.995	0.9953	0.9963	0.997	0.997
GT	Unadjusted	0.1	1	-0.5	30	50000	44889	45353	45971	46581	47064	0.8978	0.9071	0.9194	0.9316	0.9413
GT	Unadjusted	0.1	1	-0.1	30	50000	44034	45149	45876	46574	47057	0.8807	0.903	0.9175	0.9315	0.9411
GT	Unadjusted	0.1	1	-0.05	30	50000	4637	10544	20447	33111	41173	0.0927	0.2109	0.4089	0.6622	0.8235
GT	Unadjusted	0.1	1	-0.01	30	50000	2	19	84	740	3087	0	0.0004	0.0017	0.0148	0.0617
GT	Unadjusted	0.1	1	0	30	50000	0	17	92	719	3074	0	0.0003	0.0018	0.0144	0.0615
GT	Unadjusted	0.1	1	0.01	30	50000	24	105	591	2872	8214	0.0005	0.0021	0.0118	0.0574	0.1643
GT	Unadjusted	0.1	1	0.05	30	50000	10521	18529	29094	39682	45315	0.2104	0.3706	0.5819	0.7936	0.9063
GT	Unadjusted	0.1	1	0.1	30	50000	46523	47766	48558	49062	49279	0.9305	0.9553	0.9712	0.9812	0.9856
GT	Unadjusted	0.1	1	0.5	30	50000	49480	49496	49587	49613	49620	0.9896	0.9899	0.9917	0.9923	0.9924
GT	Unadjusted	0.1	2	-0.5	30	50000	39785	40621	41658	43014	44212	0.7957	0.8124	0.8332	0.8603	0.8842
GT	Unadjusted	0.1	2	-0.1	30	50000	25368	28547	31897	35591	38669	0.5074	0.5709	0.6379	0.7118	0.7734
GT	Unadjusted	0.1	2	-0.05	30	50000	8142	10657	15017	21905	28606	0.1628	0.2131	0.3003	0.4381	0.5721
GT	Unadjusted	0.1	2	-0.01	30	50000	11402	12867	14853	17956	21668	0.228	0.2573	0.2971	0.3591	0.4334
GT	Unadjusted	0.1	2	0	30	50000	13125	14894	17270	21129	25402	0.2625	0.2979	0.3454	0.4226	0.508
GT	Unadjusted	0.1	2	0.01	30	50000	15216	17481	20544	25569	30934	0.3043	0.3496	0.4109	0.5114	0.6187
GT	Unadjusted	0.1	2	0.05	30	50000	31441	36347	41380	45704	47807	0.6288	0.7269	0.8276	0.9141	0.9561
GT	Unadjusted	0.1	2	0.1	30	50000	47765	48415	48831	49167	49334	0.9553	0.9683	0.9766	0.9833	0.9867
GT	Unadjusted	0.1	2	0.5	30	50000	49527	49540	49621	49654	49655	0.9905	0.9908	0.9924	0.9931	0.9931
GT	Unadjusted	0.1	5	-0.5	30	50000	35928	37202	38771	40786	42638	0.7186	0.744	0.7754	0.8157	0.8528
GT	Unadjusted	0.1	5	-0.1	30	50000	13270	16479	20754	26242	31392	0.2654	0.3296	0.4151	0.5248	0.6278
GT	Unadjusted	0.1	5	-0.05	30	50000	13323	15533	18496	23010	27953	0.2665	0.3107	0.3699	0.4602	0.5591
GT	Unadjusted	0.1	5	-0.01	30	50000	22437	25478	28984	33536	37385	0.4487	0.5096	0.5797	0.6707	0.7477
GT	Unadjusted	0.1	5	0	30	50000	25739	28823	32730	37253	40924	0.5148	0.5765	0.6546	0.7451	0.8185
GT	Unadjusted	0.1	5	0.01	30	50000	29330	32656	36474	40787	43954	0.5866	0.6531	0.7295	0.8157	0.8791
GT	Unadjusted	0.1	5	0.05	30	50000	43207	45311	47061	48319	48930	0.8641	0.9062	0.9412	0.9664	0.9786
GT	Unadjusted	0.1	5	0.1	30	50000	48452	48786	49064	49298	49446	0.969	0.9757	0.9813	0.986	0.9889
GT	Unadjusted	0.1	5	0.5	30	50000	49615	49628	49702	49737	49739	0.9923	0.9926	0.994	0.9947	0.9948
GT	Unadjusted	0.1	10	-0.5	30	50000	34358	36022	38082	40585	42731	0.6872	0.7204	0.7616	0.8117	0.8546
GT	Unadjusted	0.1	10	-0.1	30	50000	10298	12985	16856	22505	28167	0.206	0.2597	0.3371	0.4501	0.5633
GT	Unadjusted	0.1	10	-0.05	30	50000	16547	19589	23496	28413	32922	0.3309	0.3918	0.4699	0.5683	0.6584
GT	Unadjusted	0.1	10	-0.01	30	50000	29193	32819	36779	40950	43934	0.5839	0.6564	0.7356	0.819	0.8787
GT	Unadjusted	0.1	10	0	30	50000	32927	36370	39957	43553	45888	0.6585	0.7274	0.7991	0.8711	0.9178
GT	Unadjusted	0.1	10	0.01	30	50000	36790	39901	42908	45747	47395	0.7358	0.798	0.8582	0.9149	0.9479
GT	Unadjusted	0.1	10	0.05	30	50000	46436	47498	48308	48931	49250	0.9287	0.95	0.9662	0.9786	0.985
GT	Unadjusted	0.1	10	0.1	30	50000	48751	49021	49235	49430	49557	0.975	0.9804	0.9847	0.9886	0.9911
GT	Unadjusted	0.1	10	0.5	30	50000	49676	49691	49751	49781	49787	0.9935	0.9938	0.995	0.9956	0.9957
GT	Unadjusted	Combined	1	-0.5	30	250000	224553	226833	229733	232881	235400	0.8982	0.9073	0.9189	0.9315	0.9416
GT	Unadjusted	Combined	1	-0.1	30	250000	220787	225939	229585	232865	235399	0.8831	0.9038	0.9183	0.9315	0.9416
GT	Unadjusted	Combined	1	-0.05	30	250000	23387	53584	103661	167043	207175	0.0935	0.2143	0.4146	0.6682	0.8287
GT	Unadjusted	Combined	1	-0.01	30	250000	7	60	457	3879	15928	0	0.0002	0.0018	0.0155	0.0637
GT	Unadjusted	Combined	1	0	30	250000	13	68	428	3513	15023	0.0001	0.0003	0.0017	0.0141	0.0601
GT	Unadjusted	Combined	1	0.01	30	250000	89	486	2728	13931	40270	0.0004	0.0019	0.0109	0.0557	0.1611
GT	Unadjusted	Combined	1	0.05	30	250000	51327	91975	145058	198499	226518	0.2053	0.3679	0.5802	0.794	0.9061
GT	Unadjusted	Combined	1	0.1	30	250000	233181	239258	243259	245704	246831	0.9327	0.957	0.973	0.9828	0.9873
GT	Unadjusted	Combined	1	0.5	30	250000	247976	248055	248477	248622	248638	0.9919	0.9922	0.9939	0.9945	0.9946
GT	Meta-analysis	0.01	2	-0.5	5	50000	41653	42329	43227	44376	45248	0.8331	0.8466	0.8645	0.8875	0.905
GT	Meta-analysis	0.01	2	-0.1	5	50000	11023	13860	17786	24504	31677	0.2205	0.2772	0.3557	0.4901	0.6335
GT	Meta-analysis	0.01	2	-0.05	5	50000	1214	2651	5421	10552	16173	0.0243	0.053	0.1084	0.211	0.3235
GT	Meta-analysis	0.01	2	-0.01	5	50000	1170	2989	7092	14951	23267	0.0234	0.0598	0.1418	0.299	0.4653
GT	Meta-analysis	0.01	2	0	5	50000	2864	6206	11649	19362	25892	0.0573	0.1241	0.233	0.3872	0.5178
GT	Meta-analysis	0.01	2	0.01	5	50000	5755	10259	16591	23304	27857	0.1151	0.2052	0.3318	0.4661	0.5571
GT	Meta-analysis	0.01	2	0.05	5	50000	24238	27035	29215	31690	34656	0.4848	0.5407	0.5843	0.6338	0.6931
GT	Meta-analysis	0.01	2	0.1	5	50000	32616	34927	37902	41475	44254	0.6523	0.6985	0.758	0.8295	0.8851
GT	Meta-analysis	0.01	2	0.5	5	50000	48715	48868	49025	49192	49297	0.9743	0.9774	0.9805	0.9838	0.9859
GT	Meta-analysis	0.01	5	-0.5	5	50000	40042	40891	41713	42798	43785	0.8008	0.8178	0.8343	0.856	0.8757
GT	Meta-analysis	0.01	5	-0.1	5	50000	9100	11890	15807	22573	30142	0.182	0.2378	0.3161	0.4515	0.6028
GT	Meta-analysis	0.01	5	-0.05	5	50000	843	1846	3999	8279	13499	0.0169	0.0369	0.08	0.1656	0.27
GT	Meta-analysis	0.01	5	-0.01	5	50000	938	2544	6241	13586	21552	0.0188	0.0509	0.1248	0.2717	0.431
GT	Meta-analysis	0.01	5	0	5	50000	2281	5177	10575	18350	24967	0.0456	0.1035	0.2115	0.367	0.4993
GT	Meta-analysis	0.01	5	0.01	5	50000	5063	9512	15741	22794	27338	0.1013	0.1902	0.3148	0.4559	0.5468
GT	Meta-analysis	0.01	5	0.05	5	50000	23613	26657	29087	31635	34725	0.4723	0.5331	0.5817	0.6327	0.6945
GT	Meta-analysis	0.01	5	0.1	5	50000	32504	34744	37779	41477	44365	0.6501	0.6949	0.7556	0.8295	0.8873
GT	Meta-analysis	0.01	5	0.5	5	50000	48548	48701	48880	49069	49227	0.971	0.974	0.9776	0.9814	0.9845
GT	Meta-analysis	0.01	10	-0.5	5	50000	38542	39343	40309	41353	42299	0.7708	0.7869	0.8062	0.8271	0.846
GT	Meta-analysis	0.01	10	-0.1	5	50000	6692	9428	13570	20751	28600	0.1338	0.1886	0.2714	0.415	0.572
GT	Meta-analysis	0.01	10	-0.05	5	50000	610	1168	2629	6161	10978	0.0122	0.0234	0.0526	0.1232	0.2196
GT	Meta-analysis	0.01	10	-0.01	5	50000	682	2013	5399	12367	20174	0.0136	0.0403	0.108	0.2473	0.4035
GT	Meta-analysis	0.01	10	0	5	50000	1768	4374	9445	17368	24002	0.0354	0.0875	0.1889	0.3474	0.48
GT	Meta-analysis	0.01	10	0.01	5	50000	4176	8255	14607	22169	27170	0.0835	0.1651	0.2921	0.4434	0.5434
GT	Meta-analysis	0.01	10	0.05	5	50000	22699	26242	28858	31837	35193	0.454	0.5248	0.5772	0.6367	0.7039
GT	Meta-analysis	0.01	10	0.1	5	50000	32421	34704	37767	41684	44647	0.6484	0.6941	0.7553	0.8337	0.8929
GT	Meta-analysis	0.01	10	0.5	5	50000	48336	48522	48732	48960	49134	0.9667	0.9704	0.9746	0.9792	0.9827
GT	Meta-analysis	0.02	2	-0.5	5	50000	41134	41916	42882	44068	45019	0.8227	0.8383	0.8576	0.8814	0.9004
GT	Meta-analysis	0.02	2	-0.1	5	50000	10464	13208	17231	24070	31320	0.2093	0.2642	0.3446	0.4814	0.6264
GT	Meta-analysis	0.02	2	-0.05	5	50000	1292	2630	5343	10194	15534	0.0258	0.0526	0.1069	0.2039	0.3107
GT	Meta-analysis	0.02	2	-0.01	5	50000	1005	2729	6639	14355	22739	0.0201	0.0546	0.1328	0.2871	0.4548
GT	Meta-analysis	0.02	2	0	5	50000	2523	5698	11003	18945	25712	0.0505	0.114	0.2201	0.3789	0.5142
GT	Meta-analysis	0.02	2	0.01	5	50000	5340	9893	16097	23041	27752	0.1068	0.1979	0.3219	0.4608	0.555
GT	Meta-analysis	0.02	2	0.05	5	50000	23806	26841	28964	31355	34170	0.4761	0.5368	0.5793	0.6271	0.6834
GT	Meta-analysis	0.02	2	0.1	5	50000	32276	34473	37375	40882	43740	0.6455	0.6895	0.7475	0.8176	0.8748
GT	Meta-analysis	0.02	2	0.5	5	50000	48624	48787	48944	49131	49257	0.9725	0.9757	0.9789	0.9826	0.9851
GT	Meta-analysis	0.02	5	-0.5	5	50000	38948	39813	40776	42112	43329	0.779	0.7963	0.8155	0.8422	0.8666
GT	Meta-analysis	0.02	5	-0.1	5	50000	8067	10688	14583	21344	29001	0.1613	0.2138	0.2917	0.4269	0.58
GT	Meta-analysis	0.02	5	-0.05	5	50000	806	1789	3858	8052	13219	0.0161	0.0358	0.0772	0.161	0.2644
GT	Meta-analysis	0.02	5	-0.01	5	50000	986	2720	6571	13886	21758	0.0197	0.0544	0.1314	0.2777	0.4352
GT	Meta-analysis	0.02	5	0	5	50000	2516	5572	10877	18632	25004	0.0503	0.1114	0.2175	0.3726	0.5001
GT	Meta-analysis	0.02	5	0.01	5	50000	5303	9706	15994	22959	27507	0.1061	0.1941	0.3199	0.4592	0.5501
GT	Meta-analysis	0.02	5	0.05	5	50000	23458	26677	28918	31423	34451	0.4692	0.5335	0.5784	0.6285	0.689
GT	Meta-analysis	0.02	5	0.1	5	50000	32256	34517	37337	40947	43785	0.6451	0.6903	0.7467	0.8189	0.8757
GT	Meta-analysis	0.02	5	0.5	5	50000	48316	48512	48714	48958	49151	0.9663	0.9702	0.9743	0.9792	0.983
GT	Meta-analysis	0.02	10	-0.5	5	50000	37038	38006	39081	40370	41620	0.7408	0.7601	0.7816	0.8074	0.8324
GT	Meta-analysis	0.02	10	-0.1	5	50000	5699	8256	12020	18792	26569	0.114	0.1651	0.2404	0.3758	0.5314
GT	Meta-analysis	0.02	10	-0.05	5	50000	575	1121	2517	5929	10925	0.0115	0.0224	0.0503	0.1186	0.2185
GT	Meta-analysis	0.02	10	-0.01	5	50000	858	2409	6084	13381	21029	0.0172	0.0482	0.1217	0.2676	0.4206
GT	Meta-analysis	0.02	10	0	5	50000	2181	5119	10344	18233	24493	0.0436	0.1024	0.2069	0.3647	0.4899
GT	Meta-analysis	0.02	10	0.01	5	50000	4751	9186	15448	22724	27350	0.095	0.1837	0.309	0.4545	0.547
GT	Meta-analysis	0.02	10	0.05	5	50000	23209	26542	28968	31558	34738	0.4642	0.5308	0.5794	0.6312	0.6948
GT	Meta-analysis	0.02	10	0.1	5	50000	32023	34241	37154	40954	44068	0.6405	0.6848	0.7431	0.8191	0.8814
GT	Meta-analysis	0.02	10	0.5	5	50000	48123	48351	48565	48813	49028	0.9625	0.967	0.9713	0.9763	0.9806
GT	Meta-analysis	0.03	2	-0.5	5	50000	40744	41564	42589	43856	44796	0.8149	0.8313	0.8518	0.8771	0.8959
GT	Meta-analysis	0.03	2	-0.1	5	50000	9945	12591	16449	22973	30196	0.1989	0.2518	0.329	0.4595	0.6039
GT	Meta-analysis	0.03	2	-0.05	5	50000	1264	2677	5449	10410	15990	0.0253	0.0535	0.109	0.2082	0.3198
GT	Meta-analysis	0.03	2	-0.01	5	50000	1267	3209	7409	15236	23606	0.0253	0.0642	0.1482	0.3047	0.4721
GT	Meta-analysis	0.03	2	0	5	50000	2959	6294	11864	19611	26102	0.0592	0.1259	0.2373	0.3922	0.522
GT	Meta-analysis	0.03	2	0.01	5	50000	5902	10499	16816	23535	28085	0.118	0.21	0.3363	0.4707	0.5617
GT	Meta-analysis	0.03	2	0.05	5	50000	24058	26896	29024	31167	33858	0.4812	0.5379	0.5805	0.6233	0.6772
GT	Meta-analysis	0.03	2	0.1	5	50000	31925	34027	36798	40329	43210	0.6385	0.6805	0.736	0.8066	0.8642
GT	Meta-analysis	0.03	2	0.5	5	50000	48523	48704	48892	49070	49202	0.9705	0.9741	0.9778	0.9814	0.984
GT	Meta-analysis	0.03	5	-0.5	5	50000	37925	38840	39956	41485	42790	0.7585	0.7768	0.7991	0.8297	0.8558
GT	Meta-analysis	0.03	5	-0.1	5	50000	7378	10000	14078	21371	29347	0.1476	0.2	0.2816	0.4274	0.5869
GT	Meta-analysis	0.03	5	-0.05	5	50000	781	1593	3498	7408	12471	0.0156	0.0319	0.07	0.1482	0.2494
GT	Meta-analysis	0.03	5	-0.01	5	50000	748	2152	5632	12854	20867	0.015	0.043	0.1126	0.2571	0.4173
GT	Meta-analysis	0.03	5	0	5	50000	1942	4545	9601	17518	24367	0.0388	0.0909	0.192	0.3504	0.4873
GT	Meta-analysis	0.03	5	0.01	5	50000	4221	8331	14557	22115	27073	0.0844	0.1666	0.2911	0.4423	0.5415
GT	Meta-analysis	0.03	5	0.05	5	50000	22812	26262	28758	31304	34205	0.4562	0.5252	0.5752	0.6261	0.6841
GT	Meta-analysis	0.03	5	0.1	5	50000	32060	34120	36983	40616	43478	0.6412	0.6824	0.7397	0.8123	0.8696
GT	Meta-analysis	0.03	5	0.5	5	50000	48214	48419	48656	48900	49101	0.9643	0.9684	0.9731	0.978	0.982
GT	Meta-analysis	0.03	10	-0.5	5	50000	35653	36717	37879	39357	40823	0.7131	0.7343	0.7576	0.7871	0.8165
GT	Meta-analysis	0.03	10	-0.1	5	50000	4992	7311	10876	17457	25161	0.0998	0.1462	0.2175	0.3491	0.5032
GT	Meta-analysis	0.03	10	-0.05	5	50000	549	1077	2396	5688	10792	0.011	0.0215	0.0479	0.1138	0.2158
GT	Meta-analysis	0.03	10	-0.01	5	50000	1007	2744	6617	13988	21427	0.0201	0.0549	0.1323	0.2798	0.4285
GT	Meta-analysis	0.03	10	0	5	50000	2440	5399	10747	18702	24752	0.0488	0.108	0.2149	0.374	0.495
GT	Meta-analysis	0.03	10	0.01	5	50000	5187	9694	15853	22864	27405	0.1037	0.1939	0.3171	0.4573	0.5481
GT	Meta-analysis	0.03	10	0.05	5	50000	23247	26512	28919	31419	34410	0.4649	0.5302	0.5784	0.6284	0.6882
GT	Meta-analysis	0.03	10	0.1	5	50000	31922	34054	36917	40603	43604	0.6384	0.6811	0.7383	0.8121	0.8721
GT	Meta-analysis	0.03	10	0.5	5	50000	47898	48148	48398	48708	48949	0.958	0.963	0.968	0.9742	0.979
GT	Meta-analysis	0.05	2	-0.5	5	50000	39932	40802	41911	43271	44414	0.7986	0.816	0.8382	0.8654	0.8883
GT	Meta-analysis	0.05	2	-0.1	5	50000	9286	11924	15932	22903	30377	0.1857	0.2385	0.3186	0.4581	0.6075
GT	Meta-analysis	0.05	2	-0.05	5	50000	1098	2380	4812	9497	14937	0.022	0.0476	0.0962	0.1899	0.2987
GT	Meta-analysis	0.05	2	-0.01	5	50000	1050	2765	6744	14541	22954	0.021	0.0553	0.1349	0.2908	0.4591
GT	Meta-analysis	0.05	2	0	5	50000	2523	5689	11121	19063	25753	0.0505	0.1138	0.2224	0.3813	0.5151
GT	Meta-analysis	0.05	2	0.01	5	50000	5204	9663	15943	23048	27819	0.1041	0.1933	0.3189	0.461	0.5564
GT	Meta-analysis	0.05	2	0.05	5	50000	23504	26585	28860	31158	33748	0.4701	0.5317	0.5772	0.6232	0.675
GT	Meta-analysis	0.05	2	0.1	5	50000	31880	34036	36759	40319	43083	0.6376	0.6807	0.7352	0.8064	0.8617
GT	Meta-analysis	0.05	2	0.5	5	50000	48424	48636	48846	49045	49177	0.9685	0.9727	0.9769	0.9809	0.9835
GT	Meta-analysis	0.05	5	-0.5	5	50000	36182	37217	38392	40116	41630	0.7236	0.7443	0.7678	0.8023	0.8326
GT	Meta-analysis	0.05	5	-0.1	5	50000	6054	8493	12534	19903	28074	0.1211	0.1699	0.2507	0.3981	0.5615
GT	Meta-analysis	0.05	5	-0.05	5	50000	743	1463	3175	6794	11752	0.0149	0.0293	0.0635	0.1359	0.235
GT	Meta-analysis	0.05	5	-0.01	5	50000	717	2117	5473	12637	20648	0.0143	0.0423	0.1095	0.2527	0.413
GT	Meta-analysis	0.05	5	0	5	50000	1904	4534	9473	17567	24310	0.0381	0.0907	0.1895	0.3513	0.4862
GT	Meta-analysis	0.05	5	0.01	5	50000	4382	8551	14849	22332	27184	0.0876	0.171	0.297	0.4466	0.5437
GT	Meta-analysis	0.05	5	0.05	5	50000	22667	26195	28751	31251	33980	0.4533	0.5239	0.575	0.625	0.6796
GT	Meta-analysis	0.05	5	0.1	5	50000	31630	33650	36497	39944	42791	0.6326	0.673	0.7299	0.7989	0.8558
GT	Meta-analysis	0.05	5	0.5	5	50000	47970	48221	48488	48793	49016	0.9594	0.9644	0.9698	0.9759	0.9803
GT	Meta-analysis	0.05	10	-0.5	5	50000	33447	34529	35812	37486	39238	0.6689	0.6906	0.7162	0.7497	0.7848
GT	Meta-analysis	0.05	10	-0.1	5	50000	3972	5978	9491	15968	23922	0.0794	0.1196	0.1898	0.3194	0.4784
GT	Meta-analysis	0.05	10	-0.05	5	50000	453	913	2040	4983	9942	0.0091	0.0183	0.0408	0.0997	0.1988
GT	Meta-analysis	0.05	10	-0.01	5	50000	930	2600	6528	13693	21231	0.0186	0.052	0.1306	0.2739	0.4246
GT	Meta-analysis	0.05	10	0	5	50000	2409	5446	10884	18580	24567	0.0482	0.1089	0.2177	0.3716	0.4913
GT	Meta-analysis	0.05	10	0.01	5	50000	5266	9853	16017	23013	27420	0.1053	0.1971	0.3203	0.4603	0.5484
GT	Meta-analysis	0.05	10	0.05	5	50000	23331	26450	28818	31305	34262	0.4666	0.529	0.5764	0.6261	0.6852
GT	Meta-analysis	0.05	10	0.1	5	50000	31802	33860	36638	40171	43039	0.636	0.6772	0.7328	0.8034	0.8608
GT	Meta-analysis	0.05	10	0.5	5	50000	47703	47973	48235	48559	48843	0.9541	0.9595	0.9647	0.9712	0.9769
GT	Meta-analysis	0.1	2	-0.5	5	50000	38090	39061	40264	41774	43117	0.7618	0.7812	0.8053	0.8355	0.8623
GT	Meta-analysis	0.1	2	-0.1	5	50000	7743	10346	14558	22021	29908	0.1549	0.2069	0.2912	0.4404	0.5982
GT	Meta-analysis	0.1	2	-0.05	5	50000	955	2081	4311	8560	13667	0.0191	0.0416	0.0862	0.1712	0.2733
GT	Meta-analysis	0.1	2	-0.01	5	50000	875	2439	6010	13429	21741	0.0175	0.0488	0.1202	0.2686	0.4348
GT	Meta-analysis	0.1	2	0	5	50000	2089	4828	10061	17878	24817	0.0418	0.0966	0.2012	0.3576	0.4963
GT	Meta-analysis	0.1	2	0.01	5	50000	4595	8842	15036	22223	27305	0.0919	0.1768	0.3007	0.4445	0.5461
GT	Meta-analysis	0.1	2	0.05	5	50000	22917	26253	28756	31184	33874	0.4583	0.5251	0.5751	0.6237	0.6775
GT	Meta-analysis	0.1	2	0.1	5	50000	31812	33919	36655	40119	42787	0.6362	0.6784	0.7331	0.8024	0.8557
GT	Meta-analysis	0.1	2	0.5	5	50000	48357	48592	48818	49018	49121	0.9671	0.9718	0.9764	0.9804	0.9824
GT	Meta-analysis	0.1	5	-0.5	5	50000	32771	33768	35121	36987	38859	0.6554	0.6754	0.7024	0.7397	0.7772
GT	Meta-analysis	0.1	5	-0.1	5	50000	4188	6246	9757	16680	24711	0.0838	0.1249	0.1951	0.3336	0.4942
GT	Meta-analysis	0.1	5	-0.05	5	50000	623	1174	2500	5727	10619	0.0125	0.0235	0.05	0.1145	0.2124
GT	Meta-analysis	0.1	5	-0.01	5	50000	751	2215	5687	12745	20667	0.015	0.0443	0.1137	0.2549	0.4133
GT	Meta-analysis	0.1	5	0	5	50000	1940	4596	9776	17594	24353	0.0388	0.0919	0.1955	0.3519	0.4871
GT	Meta-analysis	0.1	5	0.01	5	50000	4236	8434	14699	22091	26987	0.0847	0.1687	0.294	0.4418	0.5397
GT	Meta-analysis	0.1	5	0.05	5	50000	22205	25784	28372	30653	33186	0.4441	0.5157	0.5674	0.6131	0.6637
GT	Meta-analysis	0.1	5	0.1	5	50000	30945	32777	35319	38641	41516	0.6189	0.6555	0.7064	0.7728	0.8303
GT	Meta-analysis	0.1	5	0.5	5	50000	47572	47882	48201	48585	48876	0.9514	0.9576	0.964	0.9717	0.9775
GT	Meta-analysis	0.1	10	-0.5	5	50000	29099	30072	31368	33306	35455	0.582	0.6014	0.6274	0.6661	0.7091
GT	Meta-analysis	0.1	10	-0.1	5	50000	2429	4030	7101	13198	20992	0.0486	0.0806	0.142	0.264	0.4198
GT	Meta-analysis	0.1	10	-0.05	5	50000	475	750	1448	3673	7930	0.0095	0.015	0.029	0.0735	0.1586
GT	Meta-analysis	0.1	10	-0.01	5	50000	707	2008	5349	12323	19830	0.0141	0.0402	0.107	0.2465	0.3966
GT	Meta-analysis	0.1	10	0	5	50000	1704	4252	9235	17227	23857	0.0341	0.085	0.1847	0.3445	0.4771
GT	Meta-analysis	0.1	10	0.01	5	50000	3933	8020	14385	21941	26834	0.0787	0.1604	0.2877	0.4388	0.5367
GT	Meta-analysis	0.1	10	0.05	5	50000	21757	25603	28335	30762	33370	0.4351	0.5121	0.5667	0.6152	0.6674
GT	Meta-analysis	0.1	10	0.1	5	50000	30938	32751	35288	38545	41303	0.6188	0.655	0.7058	0.7709	0.8261
GT	Meta-analysis	0.1	10	0.5	5	50000	47185	47529	47868	48270	48636	0.9437	0.9506	0.9574	0.9654	0.9727
GT	Meta-analysis	0.01	2	-0.5	30	50000	43750	44247	44857	45558	46147	0.875	0.8849	0.8971	0.9112	0.9229
GT	Meta-analysis	0.01	2	-0.1	30	50000	42853	44016	44842	45571	46159	0.8571	0.8803	0.8968	0.9114	0.9232
GT	Meta-analysis	0.01	2	-0.05	30	50000	4067	9459	18723	31414	39871	0.0813	0.1892	0.3745	0.6283	0.7974
GT	Meta-analysis	0.01	2	-0.01	30	50000	3	8	68	638	2838	0.0001	0.0002	0.0014	0.0128	0.0568
GT	Meta-analysis	0.01	2	0	30	50000	4	11	87	703	2936	0.0001	0.0002	0.0017	0.0141	0.0587
GT	Meta-analysis	0.01	2	0.01	30	50000	18	117	573	2823	7906	0.0004	0.0023	0.0115	0.0565	0.1581
GT	Meta-analysis	0.01	2	0.05	30	50000	10362	18449	28910	39477	45009	0.2072	0.369	0.5782	0.7895	0.9002
GT	Meta-analysis	0.01	2	0.1	30	50000	46338	47597	48417	48981	49286	0.9268	0.9519	0.9683	0.9796	0.9857
GT	Meta-analysis	0.01	2	0.5	30	50000	49648	49689	49735	49793	49841	0.993	0.9938	0.9947	0.9959	0.9968
GT	Meta-analysis	0.01	5	-0.5	30	50000	42191	42764	43397	44122	44803	0.8438	0.8553	0.8679	0.8824	0.8961
GT	Meta-analysis	0.01	5	-0.1	30	50000	40995	42368	43280	44131	44798	0.8199	0.8474	0.8656	0.8826	0.896
GT	Meta-analysis	0.01	5	-0.05	30	50000	2676	6869	15264	28047	37336	0.0535	0.1374	0.3053	0.5609	0.7467
GT	Meta-analysis	0.01	5	-0.01	30	50000	0	3	46	505	2342	0	0.0001	0.0009	0.0101	0.0468
GT	Meta-analysis	0.01	5	0	30	50000	1	9	82	688	2940	0	0.0002	0.0016	0.0138	0.0588
GT	Meta-analysis	0.01	5	0.01	30	50000	17	106	564	2799	8204	0.0003	0.0021	0.0113	0.056	0.1641
GT	Meta-analysis	0.01	5	0.05	30	50000	9787	17627	28210	39005	44893	0.1957	0.3525	0.5642	0.7801	0.8979
GT	Meta-analysis	0.01	5	0.1	30	50000	45810	47203	48154	48767	49154	0.9162	0.9441	0.9631	0.9753	0.9831
GT	Meta-analysis	0.01	5	0.5	30	50000	49629	49663	49711	49770	49803	0.9926	0.9933	0.9942	0.9954	0.9961
GT	Meta-analysis	0.01	10	-0.5	30	50000	40900	41410	42085	42919	43613	0.818	0.8282	0.8417	0.8584	0.8723
GT	Meta-analysis	0.01	10	-0.1	30	50000	39625	40984	41894	42831	43598	0.7925	0.8197	0.8379	0.8566	0.872
GT	Meta-analysis	0.01	10	-0.05	30	50000	2203	5983	13748	26260	35605	0.0441	0.1197	0.275	0.5252	0.7121
GT	Meta-analysis	0.01	10	-0.01	30	50000	0	5	38	387	2014	0	0.0001	0.0008	0.0077	0.0403
GT	Meta-analysis	0.01	10	0	30	50000	1	9	67	608	2785	0	0.0002	0.0013	0.0122	0.0557
GT	Meta-analysis	0.01	10	0.01	30	50000	14	71	455	2611	8056	0.0003	0.0014	0.0091	0.0522	0.1611
GT	Meta-analysis	0.01	10	0.05	30	50000	8944	16814	27865	39297	45282	0.1789	0.3363	0.5573	0.7859	0.9056
GT	Meta-analysis	0.01	10	0.1	30	50000	45795	47108	47983	48594	48967	0.9159	0.9422	0.9597	0.9719	0.9793
GT	Meta-analysis	0.01	10	0.5	30	50000	49553	49611	49677	49743	49799	0.9911	0.9922	0.9935	0.9949	0.996
GT	Meta-analysis	0.02	2	-0.5	30	50000	43302	43843	44475	45221	45882	0.866	0.8769	0.8895	0.9044	0.9176
GT	Meta-analysis	0.02	2	-0.1	30	50000	42410	43555	44451	45247	45896	0.8482	0.8711	0.889	0.9049	0.9179
GT	Meta-analysis	0.02	2	-0.05	30	50000	3802	8991	18311	30899	39461	0.076	0.1798	0.3662	0.618	0.7892
GT	Meta-analysis	0.02	2	-0.01	30	50000	0	3	80	635	2848	0	0.0001	0.0016	0.0127	0.057
GT	Meta-analysis	0.02	2	0	30	50000	0	9	83	675	2887	0	0.0002	0.0017	0.0135	0.0577
GT	Meta-analysis	0.02	2	0.01	30	50000	25	91	484	2594	7821	0.0005	0.0018	0.0097	0.0519	0.1564
GT	Meta-analysis	0.02	2	0.05	30	50000	9889	18046	28426	38998	44770	0.1978	0.3609	0.5685	0.78	0.8954
GT	Meta-analysis	0.02	2	0.1	30	50000	46014	47310	48212	48864	49208	0.9203	0.9462	0.9642	0.9773	0.9842
GT	Meta-analysis	0.02	2	0.5	30	50000	49594	49631	49678	49735	49798	0.9919	0.9926	0.9936	0.9947	0.996
GT	Meta-analysis	0.02	5	-0.5	30	50000	41404	42020	42729	43562	44314	0.8281	0.8404	0.8546	0.8712	0.8863
GT	Meta-analysis	0.02	5	-0.1	30	50000	40040	41458	42517	43451	44294	0.8008	0.8292	0.8503	0.869	0.8859
GT	Meta-analysis	0.02	5	-0.05	30	50000	2743	6800	15099	27605	36708	0.0549	0.136	0.302	0.5521	0.7342
GT	Meta-analysis	0.02	5	-0.01	30	50000	0	4	45	435	2276	0	0.0001	0.0009	0.0087	0.0455
GT	Meta-analysis	0.02	5	0	30	50000	1	16	92	625	2856	0	0.0003	0.0018	0.0125	0.0571
GT	Meta-analysis	0.02	5	0.01	30	50000	13	99	525	2717	8139	0.0003	0.002	0.0105	0.0543	0.1628
GT	Meta-analysis	0.02	5	0.05	30	50000	9867	17960	28207	38839	44707	0.1973	0.3592	0.5641	0.7768	0.8941
GT	Meta-analysis	0.02	5	0.1	30	50000	45458	46891	47850	48562	49010	0.9092	0.9378	0.957	0.9712	0.9802
GT	Meta-analysis	0.02	5	0.5	30	50000	49553	49594	49638	49703	49760	0.9911	0.9919	0.9928	0.9941	0.9952
GT	Meta-analysis	0.02	10	-0.5	30	50000	39854	40448	41219	42078	42933	0.7971	0.809	0.8244	0.8416	0.8587
GT	Meta-analysis	0.02	10	-0.1	30	50000	38093	39686	40791	41833	42796	0.7619	0.7937	0.8158	0.8367	0.8559
GT	Meta-analysis	0.02	10	-0.05	30	50000	1952	5466	12662	24771	34237	0.039	0.1093	0.2532	0.4954	0.6847
GT	Meta-analysis	0.02	10	-0.01	30	50000	1	3	37	389	1938	0	0.0001	0.0007	0.0078	0.0388
GT	Meta-analysis	0.02	10	0	30	50000	0	2	53	532	2714	0	0	0.0011	0.0106	0.0543
GT	Meta-analysis	0.02	10	0.01	30	50000	11	65	454	2535	7879	0.0002	0.0013	0.0091	0.0507	0.1576
GT	Meta-analysis	0.02	10	0.05	30	50000	8875	16565	27299	38648	44741	0.1775	0.3313	0.546	0.773	0.8948
GT	Meta-analysis	0.02	10	0.1	30	50000	45191	46599	47604	48386	48836	0.9038	0.932	0.9521	0.9677	0.9767
GT	Meta-analysis	0.02	10	0.5	30	50000	49466	49533	49606	49694	49746	0.9893	0.9907	0.9921	0.9939	0.9949
GT	Meta-analysis	0.03	2	-0.5	30	50000	43019	43570	44242	45011	45725	0.8604	0.8714	0.8848	0.9002	0.9145
GT	Meta-analysis	0.03	2	-0.1	30	50000	41959	43239	44188	45028	45718	0.8392	0.8648	0.8838	0.9006	0.9144
GT	Meta-analysis	0.03	2	-0.05	30	50000	3739	8988	18285	30930	39477	0.0748	0.1798	0.3657	0.6186	0.7895
GT	Meta-analysis	0.03	2	-0.01	30	50000	2	14	65	594	2702	0	0.0003	0.0013	0.0119	0.054
GT	Meta-analysis	0.03	2	0	30	50000	0	8	75	663	2852	0	0.0002	0.0015	0.0133	0.057
GT	Meta-analysis	0.03	2	0.01	30	50000	15	104	565	2645	7740	0.0003	0.0021	0.0113	0.0529	0.1548
GT	Meta-analysis	0.03	2	0.05	30	50000	9639	17557	28213	38960	44585	0.1928	0.3511	0.5643	0.7792	0.8917
GT	Meta-analysis	0.03	2	0.1	30	50000	45839	47148	48074	48740	49148	0.9168	0.943	0.9615	0.9748	0.983
GT	Meta-analysis	0.03	2	0.5	30	50000	49555	49594	49630	49728	49771	0.9911	0.9919	0.9926	0.9946	0.9954
GT	Meta-analysis	0.03	5	-0.5	30	50000	40769	41420	42155	43008	43857	0.8154	0.8284	0.8431	0.8602	0.8771
GT	Meta-analysis	0.03	5	-0.1	30	50000	39213	40699	41805	42854	43767	0.7843	0.814	0.8361	0.8571	0.8753
GT	Meta-analysis	0.03	5	-0.05	30	50000	2682	6759	14705	27164	36300	0.0536	0.1352	0.2941	0.5433	0.726
GT	Meta-analysis	0.03	5	-0.01	30	50000	2	6	51	466	2295	0	0.0001	0.001	0.0093	0.0459
GT	Meta-analysis	0.03	5	0	30	50000	2	11	72	589	2668	0	0.0002	0.0014	0.0118	0.0534
GT	Meta-analysis	0.03	5	0.01	30	50000	15	78	516	2683	7721	0.0003	0.0016	0.0103	0.0537	0.1544
GT	Meta-analysis	0.03	5	0.05	30	50000	9599	17214	27778	38529	44424	0.192	0.3443	0.5556	0.7706	0.8885
GT	Meta-analysis	0.03	5	0.1	30	50000	45125	46537	47604	48417	48888	0.9025	0.9307	0.9521	0.9683	0.9778
GT	Meta-analysis	0.03	5	0.5	30	50000	49491	49552	49621	49693	49754	0.9898	0.991	0.9924	0.9939	0.9951
GT	Meta-analysis	0.03	10	-0.5	30	50000	39132	39805	40595	41541	42461	0.7826	0.7961	0.8119	0.8308	0.8492
GT	Meta-analysis	0.03	10	-0.1	30	50000	37003	38640	39899	41128	42186	0.7401	0.7728	0.798	0.8226	0.8437
GT	Meta-analysis	0.03	10	-0.05	30	50000	1970	5248	12430	24248	33600	0.0394	0.105	0.2486	0.485	0.672
GT	Meta-analysis	0.03	10	-0.01	30	50000	0	1	31	336	1897	0	0	0.0006	0.0067	0.0379
GT	Meta-analysis	0.03	10	0	30	50000	2	11	65	599	2755	0	0.0002	0.0013	0.012	0.0551
GT	Meta-analysis	0.03	10	0.01	30	50000	13	79	443	2534	7886	0.0003	0.0016	0.0089	0.0507	0.1577
GT	Meta-analysis	0.03	10	0.05	30	50000	9080	16868	27155	38488	44620	0.1816	0.3374	0.5431	0.7698	0.8924
GT	Meta-analysis	0.03	10	0.1	30	50000	44771	46222	47287	48200	48756	0.8954	0.9244	0.9457	0.964	0.9751
GT	Meta-analysis	0.03	10	0.5	30	50000	49420	49496	49573	49653	49713	0.9884	0.9899	0.9915	0.9931	0.9943
GT	Meta-analysis	0.05	2	-0.5	30	50000	42406	42959	43669	44509	45278	0.8481	0.8592	0.8734	0.8902	0.9056
GT	Meta-analysis	0.05	2	-0.1	30	50000	41016	42420	43530	44482	45223	0.8203	0.8484	0.8706	0.8896	0.9045
GT	Meta-analysis	0.05	2	-0.05	30	50000	3759	8933	18136	30443	38860	0.0752	0.1787	0.3627	0.6089	0.7772
GT	Meta-analysis	0.05	2	-0.01	30	50000	2	8	74	651	2803	0	0.0002	0.0015	0.013	0.0561
GT	Meta-analysis	0.05	2	0	30	50000	2	5	69	637	2749	0	0.0001	0.0014	0.0127	0.055
GT	Meta-analysis	0.05	2	0.01	30	50000	22	94	477	2555	7599	0.0004	0.0019	0.0095	0.0511	0.152
GT	Meta-analysis	0.05	2	0.05	30	50000	9629	17355	27671	38480	44260	0.1926	0.3471	0.5534	0.7696	0.8852
GT	Meta-analysis	0.05	2	0.1	30	50000	45395	46812	47780	48578	49086	0.9079	0.9362	0.9556	0.9716	0.9817
GT	Meta-analysis	0.05	2	0.5	30	50000	49494	49528	49573	49656	49716	0.9899	0.9906	0.9915	0.9931	0.9943
GT	Meta-analysis	0.05	5	-0.5	30	50000	39615	40289	41081	42055	42954	0.7923	0.8058	0.8216	0.8411	0.8591
GT	Meta-analysis	0.05	5	-0.1	30	50000	37417	39144	40373	41698	42736	0.7483	0.7829	0.8075	0.834	0.8547
GT	Meta-analysis	0.05	5	-0.05	30	50000	2280	6027	13568	25504	34687	0.0456	0.1205	0.2714	0.5101	0.6937
GT	Meta-analysis	0.05	5	-0.01	30	50000	0	3	36	410	2114	0	0.0001	0.0007	0.0082	0.0423
GT	Meta-analysis	0.05	5	0	30	50000	0	11	72	620	2759	0	0.0002	0.0014	0.0124	0.0552
GT	Meta-analysis	0.05	5	0.01	30	50000	14	95	460	2515	7628	0.0003	0.0019	0.0092	0.0503	0.1526
GT	Meta-analysis	0.05	5	0.05	30	50000	9053	16569	26790	37567	43758	0.1811	0.3314	0.5358	0.7513	0.8752
GT	Meta-analysis	0.05	5	0.1	30	50000	44264	45905	47136	48111	48666	0.8853	0.9181	0.9427	0.9622	0.9733
GT	Meta-analysis	0.05	5	0.5	30	50000	49366	49430	49502	49591	49676	0.9873	0.9886	0.99	0.9918	0.9935
GT	Meta-analysis	0.05	10	-0.5	30	50000	37623	38352	39203	40292	41348	0.7525	0.767	0.7841	0.8058	0.827
GT	Meta-analysis	0.05	10	-0.1	30	50000	34624	36570	38106	39566	40889	0.6925	0.7314	0.7621	0.7913	0.8178
GT	Meta-analysis	0.05	10	-0.05	30	50000	1558	4466	10797	22190	31761	0.0312	0.0893	0.2159	0.4438	0.6352
GT	Meta-analysis	0.05	10	-0.01	30	50000	0	3	24	322	1746	0	0.0001	0.0005	0.0064	0.0349
GT	Meta-analysis	0.05	10	0	30	50000	1	9	77	624	2741	0	0.0002	0.0015	0.0125	0.0548
GT	Meta-analysis	0.05	10	0.01	30	50000	12	79	501	2613	7973	0.0002	0.0016	0.01	0.0523	0.1595
GT	Meta-analysis	0.05	10	0.05	30	50000	8902	16608	26796	37672	43684	0.178	0.3322	0.5359	0.7534	0.8737
GT	Meta-analysis	0.05	10	0.1	30	50000	43838	45524	46721	47799	48460	0.8768	0.9105	0.9344	0.956	0.9692
GT	Meta-analysis	0.05	10	0.5	30	50000	49309	49400	49468	49578	49657	0.9862	0.988	0.9894	0.9916	0.9931
GT	Meta-analysis	0.1	2	-0.5	30	50000	41266	41913	42645	43562	44332	0.8253	0.8383	0.8529	0.8712	0.8866
GT	Meta-analysis	0.1	2	-0.1	30	50000	38930	40662	42152	43440	44297	0.7786	0.8132	0.843	0.8688	0.8859
GT	Meta-analysis	0.1	2	-0.05	30	50000	3272	7909	16583	28598	37180	0.0654	0.1582	0.3317	0.572	0.7436
GT	Meta-analysis	0.1	2	-0.01	30	50000	1	7	56	542	2584	0	0.0001	0.0011	0.0108	0.0517
GT	Meta-analysis	0.1	2	0	30	50000	0	7	88	670	2839	0	0.0001	0.0018	0.0134	0.0568
GT	Meta-analysis	0.1	2	0.01	30	50000	14	99	553	2736	7763	0.0003	0.002	0.0111	0.0547	0.1553
GT	Meta-analysis	0.1	2	0.05	30	50000	9830	17370	27361	37846	43663	0.1966	0.3474	0.5472	0.7569	0.8733
GT	Meta-analysis	0.1	2	0.1	30	50000	44516	46008	47172	48307	48916	0.8903	0.9202	0.9434	0.9661	0.9783
GT	Meta-analysis	0.1	2	0.5	30	50000	49435	49469	49506	49591	49640	0.9887	0.9894	0.9901	0.9918	0.9928
GT	Meta-analysis	0.1	5	-0.5	30	50000	37131	37827	38699	39872	40962	0.7426	0.7565	0.774	0.7974	0.8192
GT	Meta-analysis	0.1	5	-0.1	30	50000	33724	35708	37254	38960	40360	0.6745	0.7142	0.7451	0.7792	0.8072
GT	Meta-analysis	0.1	5	-0.05	30	50000	2000	5241	11947	22969	32079	0.04	0.1048	0.2389	0.4594	0.6416
GT	Meta-analysis	0.1	5	-0.01	30	50000	2	5	28	371	1978	0	0.0001	0.0006	0.0074	0.0396
GT	Meta-analysis	0.1	5	0	30	50000	0	5	79	633	2700	0	0.0001	0.0016	0.0127	0.054
GT	Meta-analysis	0.1	5	0.01	30	50000	10	95	488	2456	7446	0.0002	0.0019	0.0098	0.0491	0.1489
GT	Meta-analysis	0.1	5	0.05	30	50000	8732	16045	25868	36449	42686	0.1746	0.3209	0.5174	0.729	0.8537
GT	Meta-analysis	0.1	5	0.1	30	50000	42837	44630	46103	47344	48209	0.8567	0.8926	0.9221	0.9469	0.9642
GT	Meta-analysis	0.1	5	0.5	30	50000	49274	49358	49435	49522	49591	0.9855	0.9872	0.9887	0.9904	0.9918
GT	Meta-analysis	0.1	10	-0.5	30	50000	34442	35239	36284	37575	38743	0.6888	0.7048	0.7257	0.7515	0.7749
GT	Meta-analysis	0.1	10	-0.1	30	50000	29888	32183	34128	36068	37836	0.5978	0.6437	0.6826	0.7214	0.7567
GT	Meta-analysis	0.1	10	-0.05	30	50000	1233	3753	9204	19131	28344	0.0247	0.0751	0.1841	0.3826	0.5669
GT	Meta-analysis	0.1	10	-0.01	30	50000	0	1	25	277	1648	0	0	0.0005	0.0055	0.033
GT	Meta-analysis	0.1	10	0	30	50000	2	10	79	545	2615	0	0.0002	0.0016	0.0109	0.0523
GT	Meta-analysis	0.1	10	0.01	30	50000	11	71	427	2472	7646	0.0002	0.0014	0.0085	0.0494	0.1529
GT	Meta-analysis	0.1	10	0.05	30	50000	7961	15029	25179	36071	42310	0.1592	0.3006	0.5036	0.7214	0.8462
GT	Meta-analysis	0.1	10	0.1	30	50000	41983	43986	45561	46855	47807	0.8397	0.8797	0.9112	0.9371	0.9561
GT	Meta-analysis	0.1	10	0.5	30	50000	49107	49216	49334	49457	49568	0.9821	0.9843	0.9867	0.9891	0.9914
GL	RUTH-Score	0.01	1	-0.5	5	50000	43282	43843	44467	45219	45946	0.8656	0.8769	0.8893	0.9044	0.9189
GL	RUTH-Score	0.01	1	-0.1	5	50000	37000	41295	43809	45156	45921	0.74	0.8259	0.8762	0.9031	0.9184
GL	RUTH-Score	0.01	1	-0.05	5	50000	1633	4400	10639	22502	33215	0.0327	0.088	0.2128	0.45	0.6643
GL	RUTH-Score	0.01	1	-0.01	5	50000	2	14	109	743	2926	0	0.0003	0.0022	0.0149	0.0585
GL	RUTH-Score	0.01	1	0	5	50000	0	5	40	471	2410	0	0.0001	0.0008	0.0094	0.0482
GL	RUTH-Score	0.01	1	0.01	5	50000	3	22	222	1419	4910	0.0001	0.0004	0.0044	0.0284	0.0982
GL	RUTH-Score	0.01	1	0.05	5	50000	2440	6076	13727	25984	36222	0.0488	0.1215	0.2745	0.5197	0.7244
GL	RUTH-Score	0.01	1	0.1	5	50000	33519	38496	42442	45365	46974	0.6704	0.7699	0.8488	0.9073	0.9395
GL	RUTH-Score	0.01	1	0.5	5	50000	48061	48404	48692	48996	49169	0.9612	0.9681	0.9738	0.9799	0.9834
GL	RUTH-Score	0.01	2	-0.5	5	50000	42454	43075	43782	44642	45395	0.8491	0.8615	0.8756	0.8928	0.9079
GL	RUTH-Score	0.01	2	-0.1	5	50000	36160	40539	43060	44537	45402	0.7232	0.8108	0.8612	0.8907	0.908
GL	RUTH-Score	0.01	2	-0.05	5	50000	1653	4367	10626	22146	32739	0.0331	0.0873	0.2125	0.4429	0.6548
GL	RUTH-Score	0.01	2	-0.01	5	50000	1	13	87	696	2961	0	0.0003	0.0017	0.0139	0.0592
GL	RUTH-Score	0.01	2	0	5	50000	1	6	70	520	2496	0	0.0001	0.0014	0.0104	0.0499
GL	RUTH-Score	0.01	2	0.01	5	50000	1	23	195	1366	4950	0	0.0005	0.0039	0.0273	0.099
GL	RUTH-Score	0.01	2	0.05	5	50000	2389	6174	13677	26048	36025	0.0478	0.1235	0.2735	0.521	0.7205
GL	RUTH-Score	0.01	2	0.1	5	50000	33315	38286	42263	45185	46854	0.6663	0.7657	0.8453	0.9037	0.9371
GL	RUTH-Score	0.01	2	0.5	5	50000	47956	48253	48600	48938	49183	0.9591	0.9651	0.972	0.9788	0.9837
GL	RUTH-Score	0.01	5	-0.5	5	50000	41565	42261	42998	43956	44846	0.8313	0.8452	0.86	0.8791	0.8969
GL	RUTH-Score	0.01	5	-0.1	5	50000	35271	39686	42262	43846	44813	0.7054	0.7937	0.8452	0.8769	0.8963
GL	RUTH-Score	0.01	5	-0.05	5	50000	1601	4263	10391	21788	32448	0.032	0.0853	0.2078	0.4358	0.649
GL	RUTH-Score	0.01	5	-0.01	5	50000	3	16	88	695	2981	0.0001	0.0003	0.0018	0.0139	0.0596
GL	RUTH-Score	0.01	5	0	5	50000	1	10	54	505	2379	0	0.0002	0.0011	0.0101	0.0476
GL	RUTH-Score	0.01	5	0.01	5	50000	4	33	211	1369	4973	0.0001	0.0007	0.0042	0.0274	0.0995
GL	RUTH-Score	0.01	5	0.05	5	50000	2289	5869	13244	25440	35678	0.0458	0.1174	0.2649	0.5088	0.7136
GL	RUTH-Score	0.01	5	0.1	5	50000	32832	38029	42040	44977	46756	0.6566	0.7606	0.8408	0.8995	0.9351
GL	RUTH-Score	0.01	5	0.5	5	50000	47904	48220	48577	48917	49189	0.9581	0.9644	0.9715	0.9783	0.9838
GL	RUTH-Score	0.01	10	-0.5	5	50000	41007	41686	42509	43506	44434	0.8201	0.8337	0.8502	0.8701	0.8887
GL	RUTH-Score	0.01	10	-0.1	5	50000	34733	39152	41741	43407	44399	0.6947	0.783	0.8348	0.8681	0.888
GL	RUTH-Score	0.01	10	-0.05	5	50000	1689	4267	10583	22190	32674	0.0338	0.0853	0.2117	0.4438	0.6535
GL	RUTH-Score	0.01	10	-0.01	5	50000	3	19	116	768	3163	0.0001	0.0004	0.0023	0.0154	0.0633
GL	RUTH-Score	0.01	10	0	5	50000	2	6	56	471	2380	0	0.0001	0.0011	0.0094	0.0476
GL	RUTH-Score	0.01	10	0.01	5	50000	5	27	188	1257	4682	0.0001	0.0005	0.0038	0.0251	0.0936
GL	RUTH-Score	0.01	10	0.05	5	50000	2151	5656	12864	24842	35033	0.043	0.1131	0.2573	0.4968	0.7007
GL	RUTH-Score	0.01	10	0.1	5	50000	32201	37513	41702	44916	46720	0.644	0.7503	0.834	0.8983	0.9344
GL	RUTH-Score	0.01	10	0.5	5	50000	47853	48195	48545	48899	49138	0.9571	0.9639	0.9709	0.978	0.9828
GL	RUTH-Score	0.02	1	-0.5	5	50000	43274	43858	44491	45226	45899	0.8655	0.8772	0.8898	0.9045	0.918
GL	RUTH-Score	0.02	1	-0.1	5	50000	37142	41248	43771	45086	45869	0.7428	0.825	0.8754	0.9017	0.9174
GL	RUTH-Score	0.02	1	-0.05	5	50000	1702	4456	10648	22386	33176	0.034	0.0891	0.213	0.4477	0.6635
GL	RUTH-Score	0.02	1	-0.01	5	50000	2	16	90	695	2855	0	0.0003	0.0018	0.0139	0.0571
GL	RUTH-Score	0.02	1	0	5	50000	1	8	57	454	2360	0	0.0002	0.0011	0.0091	0.0472
GL	RUTH-Score	0.02	1	0.01	5	50000	4	25	200	1366	5032	0.0001	0.0005	0.004	0.0273	0.1006
GL	RUTH-Score	0.02	1	0.05	5	50000	2424	6164	13814	26053	36066	0.0485	0.1233	0.2763	0.5211	0.7213
GL	RUTH-Score	0.02	1	0.1	5	50000	33473	38567	42466	45373	47006	0.6695	0.7713	0.8493	0.9075	0.9401
GL	RUTH-Score	0.02	1	0.5	5	50000	48046	48367	48687	48963	49144	0.9609	0.9673	0.9737	0.9793	0.9829
GL	RUTH-Score	0.02	2	-0.5	5	50000	42000	42672	43408	44309	45098	0.84	0.8534	0.8682	0.8862	0.902
GL	RUTH-Score	0.02	2	-0.1	5	50000	35291	39891	42633	44162	45035	0.7058	0.7978	0.8527	0.8832	0.9007
GL	RUTH-Score	0.02	2	-0.05	5	50000	1528	4117	10234	21683	32417	0.0306	0.0823	0.2047	0.4337	0.6483
GL	RUTH-Score	0.02	2	-0.01	5	50000	1	8	113	720	2934	0	0.0002	0.0023	0.0144	0.0587
GL	RUTH-Score	0.02	2	0	5	50000	0	0	39	495	2422	0	0	0.0008	0.0099	0.0484
GL	RUTH-Score	0.02	2	0.01	5	50000	4	29	187	1430	5031	0.0001	0.0006	0.0037	0.0286	0.1006
GL	RUTH-Score	0.02	2	0.05	5	50000	2307	5868	13348	25639	35651	0.0461	0.1174	0.267	0.5128	0.713
GL	RUTH-Score	0.02	2	0.1	5	50000	32845	37905	41979	45010	46747	0.6569	0.7581	0.8396	0.9002	0.9349
GL	RUTH-Score	0.02	2	0.5	5	50000	47866	48210	48579	48917	49149	0.9573	0.9642	0.9716	0.9783	0.983
GL	RUTH-Score	0.02	5	-0.5	5	50000	40710	41415	42206	43256	44193	0.8142	0.8283	0.8441	0.8651	0.8839
GL	RUTH-Score	0.02	5	-0.1	5	50000	34063	38547	41345	43062	44121	0.6813	0.7709	0.8269	0.8612	0.8824
GL	RUTH-Score	0.02	5	-0.05	5	50000	1529	4162	10348	21505	32087	0.0306	0.0832	0.207	0.4301	0.6417
GL	RUTH-Score	0.02	5	-0.01	5	50000	4	16	84	695	2967	0.0001	0.0003	0.0017	0.0139	0.0593
GL	RUTH-Score	0.02	5	0	5	50000	0	2	61	521	2350	0	0	0.0012	0.0104	0.047
GL	RUTH-Score	0.02	5	0.01	5	50000	3	20	180	1283	4786	0.0001	0.0004	0.0036	0.0257	0.0957
GL	RUTH-Score	0.02	5	0.05	5	50000	2162	5692	13014	25191	35298	0.0432	0.1138	0.2603	0.5038	0.706
GL	RUTH-Score	0.02	5	0.1	5	50000	32499	37541	41572	44760	46504	0.65	0.7508	0.8314	0.8952	0.9301
GL	RUTH-Score	0.02	5	0.5	5	50000	47746	48104	48468	48847	49112	0.9549	0.9621	0.9694	0.9769	0.9822
GL	RUTH-Score	0.02	10	-0.5	5	50000	39932	40629	41509	42679	43725	0.7986	0.8126	0.8302	0.8536	0.8745
GL	RUTH-Score	0.02	10	-0.1	5	50000	33446	37831	40533	42318	43523	0.6689	0.7566	0.8107	0.8464	0.8705
GL	RUTH-Score	0.02	10	-0.05	5	50000	1556	4228	10173	21475	31861	0.0311	0.0846	0.2035	0.4295	0.6372
GL	RUTH-Score	0.02	10	-0.01	5	50000	1	11	94	771	3039	0	0.0002	0.0019	0.0154	0.0608
GL	RUTH-Score	0.02	10	0	5	50000	0	6	42	458	2293	0	0.0001	0.0008	0.0092	0.0459
GL	RUTH-Score	0.02	10	0.01	5	50000	3	26	194	1221	4652	0.0001	0.0005	0.0039	0.0244	0.093
GL	RUTH-Score	0.02	10	0.05	5	50000	2053	5396	12507	24465	34628	0.0411	0.1079	0.2501	0.4893	0.6926
GL	RUTH-Score	0.02	10	0.1	5	50000	31849	37156	41383	44619	46494	0.637	0.7431	0.8277	0.8924	0.9299
GL	RUTH-Score	0.02	10	0.5	5	50000	47683	48051	48446	48810	49059	0.9537	0.961	0.9689	0.9762	0.9812
GL	RUTH-Score	0.03	1	-0.5	5	50000	43327	43869	44519	45241	45947	0.8665	0.8774	0.8904	0.9048	0.9189
GL	RUTH-Score	0.03	1	-0.1	5	50000	37209	41405	43874	45219	45951	0.7442	0.8281	0.8775	0.9044	0.919
GL	RUTH-Score	0.03	1	-0.05	5	50000	1684	4556	10855	22677	33375	0.0337	0.0911	0.2171	0.4535	0.6675
GL	RUTH-Score	0.03	1	-0.01	5	50000	4	16	92	733	2921	0.0001	0.0003	0.0018	0.0147	0.0584
GL	RUTH-Score	0.03	1	0	5	50000	3	11	57	500	2403	0.0001	0.0002	0.0011	0.01	0.0481
GL	RUTH-Score	0.03	1	0.01	5	50000	5	39	229	1389	4987	0.0001	0.0008	0.0046	0.0278	0.0997
GL	RUTH-Score	0.03	1	0.05	5	50000	2383	6136	13687	26212	36216	0.0477	0.1227	0.2737	0.5242	0.7243
GL	RUTH-Score	0.03	1	0.1	5	50000	33637	38614	42492	45378	46988	0.6727	0.7723	0.8498	0.9076	0.9398
GL	RUTH-Score	0.03	1	0.5	5	50000	48067	48373	48679	48952	49122	0.9613	0.9675	0.9736	0.979	0.9824
GL	RUTH-Score	0.03	2	-0.5	5	50000	41703	42356	43080	43987	44834	0.8341	0.8471	0.8616	0.8797	0.8967
GL	RUTH-Score	0.03	2	-0.1	5	50000	34526	39223	42082	43799	44771	0.6905	0.7845	0.8416	0.876	0.8954
GL	RUTH-Score	0.03	2	-0.05	5	50000	1515	4066	9920	21141	31937	0.0303	0.0813	0.1984	0.4228	0.6387
GL	RUTH-Score	0.03	2	-0.01	5	50000	2	12	105	687	2778	0	0.0002	0.0021	0.0137	0.0556
GL	RUTH-Score	0.03	2	0	5	50000	2	7	56	483	2417	0	0.0001	0.0011	0.0097	0.0483
GL	RUTH-Score	0.03	2	0.01	5	50000	3	27	220	1374	4938	0.0001	0.0005	0.0044	0.0275	0.0988
GL	RUTH-Score	0.03	2	0.05	5	50000	2176	5740	12983	25275	35440	0.0435	0.1148	0.2597	0.5055	0.7088
GL	RUTH-Score	0.03	2	0.1	5	50000	32231	37485	41597	44794	46589	0.6446	0.7497	0.8319	0.8959	0.9318
GL	RUTH-Score	0.03	2	0.5	5	50000	47793	48176	48534	48896	49108	0.9559	0.9635	0.9707	0.9779	0.9822
GL	RUTH-Score	0.03	5	-0.5	5	50000	39977	40741	41664	42750	43710	0.7995	0.8148	0.8333	0.855	0.8742
GL	RUTH-Score	0.03	5	-0.1	5	50000	33313	37718	40590	42427	43600	0.6663	0.7544	0.8118	0.8485	0.872
GL	RUTH-Score	0.03	5	-0.05	5	50000	1491	4048	9967	21073	31259	0.0298	0.081	0.1993	0.4215	0.6252
GL	RUTH-Score	0.03	5	-0.01	5	50000	2	17	105	735	2974	0	0.0003	0.0021	0.0147	0.0595
GL	RUTH-Score	0.03	5	0	5	50000	1	6	50	475	2307	0	0.0001	0.001	0.0095	0.0461
GL	RUTH-Score	0.03	5	0.01	5	50000	3	23	179	1299	4722	0.0001	0.0005	0.0036	0.026	0.0944
GL	RUTH-Score	0.03	5	0.05	5	50000	2063	5448	12676	24643	34815	0.0413	0.109	0.2535	0.4929	0.6963
GL	RUTH-Score	0.03	5	0.1	5	50000	31975	37126	41235	44617	46444	0.6395	0.7425	0.8247	0.8923	0.9289
GL	RUTH-Score	0.03	5	0.5	5	50000	47658	48007	48406	48811	49078	0.9532	0.9601	0.9681	0.9762	0.9816
GL	RUTH-Score	0.03	10	-0.5	5	50000	38939	39720	40646	41888	42954	0.7788	0.7944	0.8129	0.8378	0.8591
GL	RUTH-Score	0.03	10	-0.1	5	50000	32246	36684	39562	41510	42777	0.6449	0.7337	0.7912	0.8302	0.8555
GL	RUTH-Score	0.03	10	-0.05	5	50000	1468	4036	9977	20871	31188	0.0294	0.0807	0.1995	0.4174	0.6238
GL	RUTH-Score	0.03	10	-0.01	5	50000	1	18	105	756	3031	0	0.0004	0.0021	0.0151	0.0606
GL	RUTH-Score	0.03	10	0	5	50000	1	5	44	438	2314	0	0.0001	0.0009	0.0088	0.0463
GL	RUTH-Score	0.03	10	0.01	5	50000	5	23	172	1194	4554	0.0001	0.0005	0.0034	0.0239	0.0911
GL	RUTH-Score	0.03	10	0.05	5	50000	1932	5161	12076	24013	34359	0.0386	0.1032	0.2415	0.4803	0.6872
GL	RUTH-Score	0.03	10	0.1	5	50000	31368	36679	41110	44428	46299	0.6274	0.7336	0.8222	0.8886	0.926
GL	RUTH-Score	0.03	10	0.5	5	50000	47523	47932	48353	48768	49044	0.9505	0.9586	0.9671	0.9754	0.9809
GL	RUTH-Score	0.05	1	-0.5	5	50000	43296	43852	44499	45256	45931	0.8659	0.877	0.89	0.9051	0.9186
GL	RUTH-Score	0.05	1	-0.1	5	50000	36782	41196	43796	45123	45885	0.7356	0.8239	0.8759	0.9025	0.9177
GL	RUTH-Score	0.05	1	-0.05	5	50000	1658	4349	10548	22391	33090	0.0332	0.087	0.211	0.4478	0.6618
GL	RUTH-Score	0.05	1	-0.01	5	50000	6	21	101	654	2940	0.0001	0.0004	0.002	0.0131	0.0588
GL	RUTH-Score	0.05	1	0	5	50000	1	6	59	496	2411	0	0.0001	0.0012	0.0099	0.0482
GL	RUTH-Score	0.05	1	0.01	5	50000	0	29	195	1376	5005	0	0.0006	0.0039	0.0275	0.1001
GL	RUTH-Score	0.05	1	0.05	5	50000	2469	6306	13668	25929	36001	0.0494	0.1261	0.2734	0.5186	0.72
GL	RUTH-Score	0.05	1	0.1	5	50000	33515	38538	42440	45368	46941	0.6703	0.7708	0.8488	0.9074	0.9388
GL	RUTH-Score	0.05	1	0.5	5	50000	48062	48377	48672	48949	49114	0.9612	0.9675	0.9734	0.979	0.9823
GL	RUTH-Score	0.05	2	-0.5	5	50000	41163	41803	42538	43521	44421	0.8233	0.8361	0.8508	0.8704	0.8884
GL	RUTH-Score	0.05	2	-0.1	5	50000	33984	38596	41467	43308	44332	0.6797	0.7719	0.8293	0.8662	0.8866
GL	RUTH-Score	0.05	2	-0.05	5	50000	1466	4031	9911	21108	31549	0.0293	0.0806	0.1982	0.4222	0.631
GL	RUTH-Score	0.05	2	-0.01	5	50000	0	8	81	668	2846	0	0.0002	0.0016	0.0134	0.0569
GL	RUTH-Score	0.05	2	0	5	50000	2	13	54	509	2415	0	0.0003	0.0011	0.0102	0.0483
GL	RUTH-Score	0.05	2	0.01	5	50000	5	25	160	1250	4802	0.0001	0.0005	0.0032	0.025	0.096
GL	RUTH-Score	0.05	2	0.05	5	50000	2152	5616	12717	24884	34935	0.043	0.1123	0.2543	0.4977	0.6987
GL	RUTH-Score	0.05	2	0.1	5	50000	31878	37110	41388	44679	46540	0.6376	0.7422	0.8278	0.8936	0.9308
GL	RUTH-Score	0.05	2	0.5	5	50000	47712	48134	48539	48895	49090	0.9542	0.9627	0.9708	0.9779	0.9818
GL	RUTH-Score	0.05	5	-0.5	5	50000	38921	39668	40568	41691	42834	0.7784	0.7934	0.8114	0.8338	0.8567
GL	RUTH-Score	0.05	5	-0.1	5	50000	31769	36251	39308	41335	42639	0.6354	0.725	0.7862	0.8267	0.8528
GL	RUTH-Score	0.05	5	-0.05	5	50000	1400	3852	9587	20299	30549	0.028	0.077	0.1917	0.406	0.611
GL	RUTH-Score	0.05	5	-0.01	5	50000	3	15	89	685	2889	0.0001	0.0003	0.0018	0.0137	0.0578
GL	RUTH-Score	0.05	5	0	5	50000	2	7	47	470	2374	0	0.0001	0.0009	0.0094	0.0475
GL	RUTH-Score	0.05	5	0.01	5	50000	3	31	189	1212	4703	0.0001	0.0006	0.0038	0.0242	0.0941
GL	RUTH-Score	0.05	5	0.05	5	50000	1979	5298	12243	24286	34546	0.0396	0.106	0.2449	0.4857	0.6909
GL	RUTH-Score	0.05	5	0.1	5	50000	30943	36207	40751	44186	46209	0.6189	0.7241	0.815	0.8837	0.9242
GL	RUTH-Score	0.05	5	0.5	5	50000	47445	47913	48359	48778	49036	0.9489	0.9583	0.9672	0.9756	0.9807
GL	RUTH-Score	0.05	10	-0.5	5	50000	37518	38348	39315	40543	41743	0.7504	0.767	0.7863	0.8109	0.8349
GL	RUTH-Score	0.05	10	-0.1	5	50000	31109	35167	37925	39995	41434	0.6222	0.7033	0.7585	0.7999	0.8287
GL	RUTH-Score	0.05	10	-0.05	5	50000	1438	3977	9776	20432	30446	0.0288	0.0795	0.1955	0.4086	0.6089
GL	RUTH-Score	0.05	10	-0.01	5	50000	2	9	115	739	3068	0	0.0002	0.0023	0.0148	0.0614
GL	RUTH-Score	0.05	10	0	5	50000	1	5	51	448	2300	0	0.0001	0.001	0.009	0.046
GL	RUTH-Score	0.05	10	0.01	5	50000	5	27	190	1217	4480	0.0001	0.0005	0.0038	0.0243	0.0896
GL	RUTH-Score	0.05	10	0.05	5	50000	1818	5058	11968	23824	34105	0.0364	0.1012	0.2394	0.4765	0.6821
GL	RUTH-Score	0.05	10	0.1	5	50000	30705	36098	40585	44110	46132	0.6141	0.722	0.8117	0.8822	0.9226
GL	RUTH-Score	0.05	10	0.5	5	50000	47396	47826	48267	48695	48981	0.9479	0.9565	0.9653	0.9739	0.9796
GL	RUTH-Score	0.1	1	-0.5	5	50000	43319	43857	44471	45217	45901	0.8664	0.8771	0.8894	0.9043	0.918
GL	RUTH-Score	0.1	1	-0.1	5	50000	36788	41173	43720	45150	45897	0.7358	0.8235	0.8744	0.903	0.9179
GL	RUTH-Score	0.1	1	-0.05	5	50000	1621	4331	10536	22220	33190	0.0324	0.0866	0.2107	0.4444	0.6638
GL	RUTH-Score	0.1	1	-0.01	5	50000	4	14	96	704	2932	0.0001	0.0003	0.0019	0.0141	0.0586
GL	RUTH-Score	0.1	1	0	5	50000	0	7	52	495	2365	0	0.0001	0.001	0.0099	0.0473
GL	RUTH-Score	0.1	1	0.01	5	50000	5	31	229	1451	5075	0.0001	0.0006	0.0046	0.029	0.1015
GL	RUTH-Score	0.1	1	0.05	5	50000	2429	6109	13670	25930	36154	0.0486	0.1222	0.2734	0.5186	0.7231
GL	RUTH-Score	0.1	1	0.1	5	50000	33377	38446	42361	45385	47000	0.6675	0.7689	0.8472	0.9077	0.94
GL	RUTH-Score	0.1	1	0.5	5	50000	48072	48378	48692	48948	49096	0.9614	0.9676	0.9738	0.979	0.9819
GL	RUTH-Score	0.1	2	-0.5	5	50000	39938	40620	41444	42527	43514	0.7988	0.8124	0.8289	0.8505	0.8703
GL	RUTH-Score	0.1	2	-0.1	5	50000	32546	37073	40152	42171	43455	0.6509	0.7415	0.803	0.8434	0.8691
GL	RUTH-Score	0.1	2	-0.05	5	50000	1506	4075	9809	20759	30991	0.0301	0.0815	0.1962	0.4152	0.6198
GL	RUTH-Score	0.1	2	-0.01	5	50000	3	14	101	715	2885	0.0001	0.0003	0.002	0.0143	0.0577
GL	RUTH-Score	0.1	2	0	5	50000	1	5	55	461	2319	0	0.0001	0.0011	0.0092	0.0464
GL	RUTH-Score	0.1	2	0.01	5	50000	4	25	184	1266	4690	0.0001	0.0005	0.0037	0.0253	0.0938
GL	RUTH-Score	0.1	2	0.05	5	50000	1982	5251	12312	24263	34711	0.0396	0.105	0.2462	0.4853	0.6942
GL	RUTH-Score	0.1	2	0.1	5	50000	30723	36161	40719	44309	46475	0.6145	0.7232	0.8144	0.8862	0.9295
GL	RUTH-Score	0.1	2	0.5	5	50000	47682	48117	48539	48870	49069	0.9536	0.9623	0.9708	0.9774	0.9814
GL	RUTH-Score	0.1	5	-0.5	5	50000	36452	37301	38282	39523	40780	0.729	0.746	0.7656	0.7905	0.8156
GL	RUTH-Score	0.1	5	-0.1	5	50000	28658	33161	36297	38729	40361	0.5732	0.6632	0.7259	0.7746	0.8072
GL	RUTH-Score	0.1	5	-0.05	5	50000	1275	3535	8798	18808	28616	0.0255	0.0707	0.176	0.3762	0.5723
GL	RUTH-Score	0.1	5	-0.01	5	50000	2	9	78	706	2915	0	0.0002	0.0016	0.0141	0.0583
GL	RUTH-Score	0.1	5	0	5	50000	1	5	50	486	2280	0	0.0001	0.001	0.0097	0.0456
GL	RUTH-Score	0.1	5	0.01	5	50000	2	21	157	1111	4435	0	0.0004	0.0031	0.0222	0.0887
GL	RUTH-Score	0.1	5	0.05	5	50000	1732	4807	11496	23075	33415	0.0346	0.0961	0.2299	0.4615	0.6683
GL	RUTH-Score	0.1	5	0.1	5	50000	28869	34613	39457	43483	45825	0.5774	0.6923	0.7891	0.8697	0.9165
GL	RUTH-Score	0.1	5	0.5	5	50000	47281	47776	48216	48692	48974	0.9456	0.9555	0.9643	0.9738	0.9795
GL	RUTH-Score	0.1	10	-0.5	5	50000	34292	35218	36304	37732	39152	0.6858	0.7044	0.7261	0.7546	0.783
GL	RUTH-Score	0.1	10	-0.1	5	50000	26905	31175	34297	36703	38544	0.5381	0.6235	0.6859	0.7341	0.7709
GL	RUTH-Score	0.1	10	-0.05	5	50000	1225	3525	8835	18555	27950	0.0245	0.0705	0.1767	0.3711	0.559
GL	RUTH-Score	0.1	10	-0.01	5	50000	5	15	105	736	3063	0.0001	0.0003	0.0021	0.0147	0.0613
GL	RUTH-Score	0.1	10	0	5	50000	1	7	42	423	2273	0	0.0001	0.0008	0.0085	0.0455
GL	RUTH-Score	0.1	10	0.01	5	50000	3	20	137	1102	4247	0.0001	0.0004	0.0027	0.022	0.0849
GL	RUTH-Score	0.1	10	0.05	5	50000	1639	4461	10779	22381	32923	0.0328	0.0892	0.2156	0.4476	0.6585
GL	RUTH-Score	0.1	10	0.1	5	50000	28363	34124	39115	43196	45563	0.5673	0.6825	0.7823	0.8639	0.9113
GL	RUTH-Score	0.1	10	0.5	5	50000	47076	47619	48104	48595	48904	0.9415	0.9524	0.9621	0.9719	0.9781
GL	RUTH-Score	Combined	1	-0.5	5	250000	216498	219279	222447	226159	229624	0.866	0.8771	0.8898	0.9046	0.9185
GL	RUTH-Score	Combined	1	-0.1	5	250000	184921	206317	218970	225734	229523	0.7397	0.8253	0.8759	0.9029	0.9181
GL	RUTH-Score	Combined	1	-0.05	5	250000	8298	22092	53226	112176	166046	0.0332	0.0884	0.2129	0.4487	0.6642
GL	RUTH-Score	Combined	1	-0.01	5	250000	18	81	488	3529	14574	0.0001	0.0003	0.002	0.0141	0.0583
GL	RUTH-Score	Combined	1	0	5	250000	5	37	265	2416	11949	0	0.0001	0.0011	0.0097	0.0478
GL	RUTH-Score	Combined	1	0.01	5	250000	17	146	1075	7001	25009	0.0001	0.0006	0.0043	0.028	0.1
GL	RUTH-Score	Combined	1	0.05	5	250000	12145	30791	68566	130108	180659	0.0486	0.1232	0.2743	0.5204	0.7226
GL	RUTH-Score	Combined	1	0.1	5	250000	167521	192661	212201	226869	234909	0.6701	0.7706	0.8488	0.9075	0.9396
GL	RUTH-Score	Combined	1	0.5	5	250000	240308	241899	243422	244808	245645	0.9612	0.9676	0.9737	0.9792	0.9826
GL	RUTH-Score	0.01	1	-0.5	30	50000	46533	46786	47061	47465	47819	0.9307	0.9357	0.9412	0.9493	0.9564
GL	RUTH-Score	0.01	1	-0.1	30	50000	46360	46727	47046	47445	47807	0.9272	0.9345	0.9409	0.9489	0.9561
GL	RUTH-Score	0.01	1	-0.05	30	50000	12528	20143	30035	40295	45348	0.2506	0.4029	0.6007	0.8059	0.907
GL	RUTH-Score	0.01	1	-0.01	30	50000	19	64	377	1680	5331	0.0004	0.0013	0.0075	0.0336	0.1066
GL	RUTH-Score	0.01	1	0	30	50000	4	16	71	500	2401	0.0001	0.0003	0.0014	0.01	0.048
GL	RUTH-Score	0.01	1	0.01	30	50000	4	18	174	1185	4466	0.0001	0.0004	0.0035	0.0237	0.0893
GL	RUTH-Score	0.01	1	0.05	30	50000	5251	11309	21627	34503	42557	0.105	0.2262	0.4325	0.6901	0.8511
GL	RUTH-Score	0.01	1	0.1	30	50000	42297	44696	46468	47854	48692	0.8459	0.8939	0.9294	0.9571	0.9738
GL	RUTH-Score	0.01	1	0.5	30	50000	49028	49180	49317	49464	49574	0.9806	0.9836	0.9863	0.9893	0.9915
GL	RUTH-Score	0.01	2	-0.5	30	50000	45646	46017	46399	46862	47327	0.9129	0.9203	0.928	0.9372	0.9465
GL	RUTH-Score	0.01	2	-0.1	30	50000	45506	45949	46402	46857	47320	0.9101	0.919	0.928	0.9371	0.9464
GL	RUTH-Score	0.01	2	-0.05	30	50000	11958	19442	29369	39516	44763	0.2392	0.3888	0.5874	0.7903	0.8953
GL	RUTH-Score	0.01	2	-0.01	30	50000	20	79	338	1712	5355	0.0004	0.0016	0.0068	0.0342	0.1071
GL	RUTH-Score	0.01	2	0	30	50000	4	18	66	513	2350	0.0001	0.0004	0.0013	0.0103	0.047
GL	RUTH-Score	0.01	2	0.01	30	50000	5	22	179	1178	4456	0.0001	0.0004	0.0036	0.0236	0.0891
GL	RUTH-Score	0.01	2	0.05	30	50000	5151	11210	21388	34132	42144	0.103	0.2242	0.4278	0.6826	0.8429
GL	RUTH-Score	0.01	2	0.1	30	50000	41910	44316	46081	47535	48446	0.8382	0.8863	0.9216	0.9507	0.9689
GL	RUTH-Score	0.01	2	0.5	30	50000	48687	48889	49089	49294	49468	0.9737	0.9778	0.9818	0.9859	0.9894
GL	RUTH-Score	0.01	5	-0.5	30	50000	44709	45155	45633	46201	46721	0.8942	0.9031	0.9127	0.924	0.9344
GL	RUTH-Score	0.01	5	-0.1	30	50000	44524	45098	45592	46191	46758	0.8905	0.902	0.9118	0.9238	0.9352
GL	RUTH-Score	0.01	5	-0.05	30	50000	11087	18814	28872	39007	44251	0.2217	0.3763	0.5774	0.7801	0.885
GL	RUTH-Score	0.01	5	-0.01	30	50000	29	83	363	1714	5466	0.0006	0.0017	0.0073	0.0343	0.1093
GL	RUTH-Score	0.01	5	0	30	50000	2	8	72	535	2363	0	0.0002	0.0014	0.0107	0.0473
GL	RUTH-Score	0.01	5	0.01	30	50000	3	29	177	1148	4472	0.0001	0.0006	0.0035	0.023	0.0894
GL	RUTH-Score	0.01	5	0.05	30	50000	4893	10792	20744	33605	41804	0.0979	0.2158	0.4149	0.6721	0.8361
GL	RUTH-Score	0.01	5	0.1	30	50000	41440	43920	45734	47355	48286	0.8288	0.8784	0.9147	0.9471	0.9657
GL	RUTH-Score	0.01	5	0.5	30	50000	48474	48733	49009	49299	49517	0.9695	0.9747	0.9802	0.986	0.9903
GL	RUTH-Score	0.01	10	-0.5	30	50000	44172	44610	45127	45799	46362	0.8834	0.8922	0.9025	0.916	0.9272
GL	RUTH-Score	0.01	10	-0.1	30	50000	43998	44616	45144	45800	46426	0.88	0.8923	0.9029	0.916	0.9285
GL	RUTH-Score	0.01	10	-0.05	30	50000	11617	19386	29320	39098	44105	0.2323	0.3877	0.5864	0.782	0.8821
GL	RUTH-Score	0.01	10	-0.01	30	50000	28	108	394	1873	5744	0.0006	0.0022	0.0079	0.0375	0.1149
GL	RUTH-Score	0.01	10	0	30	50000	2	11	67	552	2496	0	0.0002	0.0013	0.011	0.0499
GL	RUTH-Score	0.01	10	0.01	30	50000	2	22	123	1080	4309	0	0.0004	0.0025	0.0216	0.0862
GL	RUTH-Score	0.01	10	0.05	30	50000	4726	10513	20326	33159	41607	0.0945	0.2103	0.4065	0.6632	0.8321
GL	RUTH-Score	0.01	10	0.1	30	50000	41326	43816	45688	47285	48267	0.8265	0.8763	0.9138	0.9457	0.9653
GL	RUTH-Score	0.01	10	0.5	30	50000	48406	48686	48957	49265	49485	0.9681	0.9737	0.9791	0.9853	0.9897
GL	RUTH-Score	0.02	1	-0.5	30	50000	46506	46790	47083	47458	47788	0.9301	0.9358	0.9417	0.9492	0.9558
GL	RUTH-Score	0.02	1	-0.1	30	50000	46346	46738	47077	47441	47808	0.9269	0.9348	0.9415	0.9488	0.9562
GL	RUTH-Score	0.02	1	-0.05	30	50000	12560	20125	30190	40364	45271	0.2512	0.4025	0.6038	0.8073	0.9054
GL	RUTH-Score	0.02	1	-0.01	30	50000	26	92	370	1791	5439	0.0005	0.0018	0.0074	0.0358	0.1088
GL	RUTH-Score	0.02	1	0	30	50000	5	11	64	517	2428	0.0001	0.0002	0.0013	0.0103	0.0486
GL	RUTH-Score	0.02	1	0.01	30	50000	3	16	140	1216	4655	0.0001	0.0003	0.0028	0.0243	0.0931
GL	RUTH-Score	0.02	1	0.05	30	50000	5062	11183	21466	34337	42467	0.1012	0.2237	0.4293	0.6867	0.8493
GL	RUTH-Score	0.02	1	0.1	30	50000	42255	44598	46458	47841	48610	0.8451	0.892	0.9292	0.9568	0.9722
GL	RUTH-Score	0.02	1	0.5	30	50000	49003	49125	49254	49385	49497	0.9801	0.9825	0.9851	0.9877	0.9899
GL	RUTH-Score	0.02	2	-0.5	30	50000	45227	45602	46036	46569	47059	0.9045	0.912	0.9207	0.9314	0.9412
GL	RUTH-Score	0.02	2	-0.1	30	50000	45051	45558	46012	46580	47073	0.901	0.9112	0.9202	0.9316	0.9415
GL	RUTH-Score	0.02	2	-0.05	30	50000	11386	18904	28968	39156	44383	0.2277	0.3781	0.5794	0.7831	0.8877
GL	RUTH-Score	0.02	2	-0.01	30	50000	20	72	340	1699	5448	0.0004	0.0014	0.0068	0.034	0.109
GL	RUTH-Score	0.02	2	0	30	50000	6	17	70	507	2355	0.0001	0.0003	0.0014	0.0101	0.0471
GL	RUTH-Score	0.02	2	0.01	30	50000	5	26	139	1115	4460	0.0001	0.0005	0.0028	0.0223	0.0892
GL	RUTH-Score	0.02	2	0.05	30	50000	5007	11048	21172	33938	41846	0.1001	0.221	0.4234	0.6788	0.8369
GL	RUTH-Score	0.02	2	0.1	30	50000	41335	43783	45720	47306	48318	0.8267	0.8757	0.9144	0.9461	0.9664
GL	RUTH-Score	0.02	2	0.5	30	50000	48464	48696	48939	49208	49380	0.9693	0.9739	0.9788	0.9842	0.9876
GL	RUTH-Score	0.02	5	-0.5	30	50000	43876	44345	44851	45577	46197	0.8775	0.8869	0.897	0.9115	0.9239
GL	RUTH-Score	0.02	5	-0.1	30	50000	43726	44315	44905	45585	46197	0.8745	0.8863	0.8981	0.9117	0.9239
GL	RUTH-Score	0.02	5	-0.05	30	50000	10958	18477	28383	38471	43618	0.2192	0.3695	0.5677	0.7694	0.8724
GL	RUTH-Score	0.02	5	-0.01	30	50000	27	84	335	1775	5481	0.0005	0.0017	0.0067	0.0355	0.1096
GL	RUTH-Score	0.02	5	0	30	50000	4	22	76	514	2323	0.0001	0.0004	0.0015	0.0103	0.0465
GL	RUTH-Score	0.02	5	0.01	30	50000	3	18	158	1129	4421	0.0001	0.0004	0.0032	0.0226	0.0884
GL	RUTH-Score	0.02	5	0.05	30	50000	4796	10870	20904	33286	41595	0.0959	0.2174	0.4181	0.6657	0.8319
GL	RUTH-Score	0.02	5	0.1	30	50000	40927	43388	45318	46993	48083	0.8185	0.8678	0.9064	0.9399	0.9617
GL	RUTH-Score	0.02	5	0.5	30	50000	48162	48456	48795	49135	49404	0.9632	0.9691	0.9759	0.9827	0.9881
GL	RUTH-Score	0.02	10	-0.5	30	50000	42935	43496	44092	44896	45605	0.8587	0.8699	0.8818	0.8979	0.9121
GL	RUTH-Score	0.02	10	-0.1	30	50000	42780	43419	44125	44925	45640	0.8556	0.8684	0.8825	0.8985	0.9128
GL	RUTH-Score	0.02	10	-0.05	30	50000	10779	18238	28110	37978	43259	0.2156	0.3648	0.5622	0.7596	0.8652
GL	RUTH-Score	0.02	10	-0.01	30	50000	22	92	415	1901	5745	0.0004	0.0018	0.0083	0.038	0.1149
GL	RUTH-Score	0.02	10	0	30	50000	3	15	69	549	2405	0.0001	0.0003	0.0014	0.011	0.0481
GL	RUTH-Score	0.02	10	0.01	30	50000	2	25	146	1044	4139	0	0.0005	0.0029	0.0209	0.0828
GL	RUTH-Score	0.02	10	0.05	30	50000	4657	10269	19894	32604	41091	0.0931	0.2054	0.3979	0.6521	0.8218
GL	RUTH-Score	0.02	10	0.1	30	50000	40607	43146	45152	46844	47970	0.8121	0.8629	0.903	0.9369	0.9594
GL	RUTH-Score	0.02	10	0.5	30	50000	48035	48344	48706	49091	49374	0.9607	0.9669	0.9741	0.9818	0.9875
GL	RUTH-Score	0.03	1	-0.5	30	50000	46496	46774	47062	47437	47811	0.9299	0.9355	0.9412	0.9487	0.9562
GL	RUTH-Score	0.03	1	-0.1	30	50000	46346	46722	47044	47434	47787	0.9269	0.9344	0.9409	0.9487	0.9557
GL	RUTH-Score	0.03	1	-0.05	30	50000	12534	20069	30197	40221	45282	0.2507	0.4014	0.6039	0.8044	0.9056
GL	RUTH-Score	0.03	1	-0.01	30	50000	28	88	381	1775	5346	0.0006	0.0018	0.0076	0.0355	0.1069
GL	RUTH-Score	0.03	1	0	30	50000	4	17	75	533	2365	0.0001	0.0003	0.0015	0.0107	0.0473
GL	RUTH-Score	0.03	1	0.01	30	50000	4	24	152	1192	4526	0.0001	0.0005	0.003	0.0238	0.0905
GL	RUTH-Score	0.03	1	0.05	30	50000	5159	11394	21722	34457	42544	0.1032	0.2279	0.4344	0.6891	0.8509
GL	RUTH-Score	0.03	1	0.1	30	50000	42360	44636	46454	47841	48590	0.8472	0.8927	0.9291	0.9568	0.9718
GL	RUTH-Score	0.03	1	0.5	30	50000	48975	49123	49228	49333	49443	0.9795	0.9825	0.9846	0.9867	0.9889
GL	RUTH-Score	0.03	2	-0.5	30	50000	44974	45355	45867	46388	46898	0.8995	0.9071	0.9173	0.9278	0.938
GL	RUTH-Score	0.03	2	-0.1	30	50000	44836	45359	45810	46356	46840	0.8967	0.9072	0.9162	0.9271	0.9368
GL	RUTH-Score	0.03	2	-0.05	30	50000	11427	18998	29028	39140	44298	0.2285	0.38	0.5806	0.7828	0.886
GL	RUTH-Score	0.03	2	-0.01	30	50000	24	91	352	1709	5364	0.0005	0.0018	0.007	0.0342	0.1073
GL	RUTH-Score	0.03	2	0	30	50000	3	14	76	547	2467	0.0001	0.0003	0.0015	0.0109	0.0493
GL	RUTH-Score	0.03	2	0.01	30	50000	1	21	167	1166	4474	0	0.0004	0.0033	0.0233	0.0895
GL	RUTH-Score	0.03	2	0.05	30	50000	4744	10776	20692	33541	41746	0.0949	0.2155	0.4138	0.6708	0.8349
GL	RUTH-Score	0.03	2	0.1	30	50000	41228	43614	45471	47134	48216	0.8246	0.8723	0.9094	0.9427	0.9643
GL	RUTH-Score	0.03	2	0.5	30	50000	48292	48544	48808	49068	49271	0.9658	0.9709	0.9762	0.9814	0.9854
GL	RUTH-Score	0.03	5	-0.5	30	50000	43196	43699	44269	45063	45719	0.8639	0.874	0.8854	0.9013	0.9144
GL	RUTH-Score	0.03	5	-0.1	30	50000	43009	43641	44261	45039	45727	0.8602	0.8728	0.8852	0.9008	0.9145
GL	RUTH-Score	0.03	5	-0.05	30	50000	10651	18061	27937	38004	43205	0.213	0.3612	0.5587	0.7601	0.8641
GL	RUTH-Score	0.03	5	-0.01	30	50000	33	83	371	1760	5505	0.0007	0.0017	0.0074	0.0352	0.1101
GL	RUTH-Score	0.03	5	0	30	50000	2	12	84	502	2323	0	0.0002	0.0017	0.01	0.0465
GL	RUTH-Score	0.03	5	0.01	30	50000	2	19	141	1118	4378	0	0.0004	0.0028	0.0224	0.0876
GL	RUTH-Score	0.03	5	0.05	30	50000	4654	10598	20155	32997	41252	0.0931	0.212	0.4031	0.6599	0.825
GL	RUTH-Score	0.03	5	0.1	30	50000	40321	42847	44927	46759	47940	0.8064	0.8569	0.8985	0.9352	0.9588
GL	RUTH-Score	0.03	5	0.5	30	50000	47912	48278	48651	49021	49327	0.9582	0.9656	0.973	0.9804	0.9865
GL	RUTH-Score	0.03	10	-0.5	30	50000	42124	42662	43364	44246	45011	0.8425	0.8532	0.8673	0.8849	0.9002
GL	RUTH-Score	0.03	10	-0.1	30	50000	41923	42573	43263	44118	44962	0.8385	0.8515	0.8653	0.8824	0.8992
GL	RUTH-Score	0.03	10	-0.05	30	50000	10564	17883	27804	37501	42644	0.2113	0.3577	0.5561	0.75	0.8529
GL	RUTH-Score	0.03	10	-0.01	30	50000	26	100	407	1941	5726	0.0005	0.002	0.0081	0.0388	0.1145
GL	RUTH-Score	0.03	10	0	30	50000	8	16	73	544	2476	0.0002	0.0003	0.0015	0.0109	0.0495
GL	RUTH-Score	0.03	10	0.01	30	50000	2	13	127	1042	4120	0	0.0003	0.0025	0.0208	0.0824
GL	RUTH-Score	0.03	10	0.05	30	50000	4564	10239	19667	32270	40874	0.0913	0.2048	0.3933	0.6454	0.8175
GL	RUTH-Score	0.03	10	0.1	30	50000	39913	42586	44685	46564	47830	0.7983	0.8517	0.8937	0.9313	0.9566
GL	RUTH-Score	0.03	10	0.5	30	50000	47716	48114	48532	48982	49285	0.9543	0.9623	0.9706	0.9796	0.9857
GL	RUTH-Score	0.05	1	-0.5	30	50000	46477	46737	47040	47434	47802	0.9295	0.9347	0.9408	0.9487	0.956
GL	RUTH-Score	0.05	1	-0.1	30	50000	46344	46729	47043	47417	47782	0.9269	0.9346	0.9409	0.9483	0.9556
GL	RUTH-Score	0.05	1	-0.05	30	50000	12461	19958	29919	40141	45171	0.2492	0.3992	0.5984	0.8028	0.9034
GL	RUTH-Score	0.05	1	-0.01	30	50000	33	95	337	1697	5271	0.0007	0.0019	0.0067	0.0339	0.1054
GL	RUTH-Score	0.05	1	0	30	50000	4	16	82	547	2356	0.0001	0.0003	0.0016	0.0109	0.0471
GL	RUTH-Score	0.05	1	0.01	30	50000	6	20	140	1151	4602	0.0001	0.0004	0.0028	0.023	0.092
GL	RUTH-Score	0.05	1	0.05	30	50000	5105	11259	21418	34313	42485	0.1021	0.2252	0.4284	0.6863	0.8497
GL	RUTH-Score	0.05	1	0.1	30	50000	42295	44596	46419	47831	48586	0.8459	0.8919	0.9284	0.9566	0.9717
GL	RUTH-Score	0.05	1	0.5	30	50000	48976	49099	49188	49313	49401	0.9795	0.982	0.9838	0.9863	0.988
GL	RUTH-Score	0.05	2	-0.5	30	50000	44336	44783	45283	45890	46497	0.8867	0.8957	0.9057	0.9178	0.9299
GL	RUTH-Score	0.05	2	-0.1	30	50000	44198	44736	45271	45916	46456	0.884	0.8947	0.9054	0.9183	0.9291
GL	RUTH-Score	0.05	2	-0.05	30	50000	11262	18866	28766	38741	43910	0.2252	0.3773	0.5753	0.7748	0.8782
GL	RUTH-Score	0.05	2	-0.01	30	50000	25	78	360	1756	5429	0.0005	0.0016	0.0072	0.0351	0.1086
GL	RUTH-Score	0.05	2	0	30	50000	4	17	75	526	2437	0.0001	0.0003	0.0015	0.0105	0.0487
GL	RUTH-Score	0.05	2	0.01	30	50000	4	25	148	1091	4446	0.0001	0.0005	0.003	0.0218	0.0889
GL	RUTH-Score	0.05	2	0.05	30	50000	4844	10654	20388	33194	41375	0.0969	0.2131	0.4078	0.6639	0.8275
GL	RUTH-Score	0.05	2	0.1	30	50000	40463	42967	45051	46903	48077	0.8093	0.8593	0.901	0.9381	0.9615
GL	RUTH-Score	0.05	2	0.5	30	50000	48000	48300	48599	48872	49104	0.96	0.966	0.972	0.9774	0.9821
GL	RUTH-Score	0.05	5	-0.5	30	50000	41981	42494	43127	44005	44850	0.8396	0.8499	0.8625	0.8801	0.897
GL	RUTH-Score	0.05	5	-0.1	30	50000	41703	42399	43150	43963	44822	0.8341	0.848	0.863	0.8793	0.8964
GL	RUTH-Score	0.05	5	-0.05	30	50000	9899	17262	26981	36884	42219	0.198	0.3452	0.5396	0.7377	0.8444
GL	RUTH-Score	0.05	5	-0.01	30	50000	14	80	370	1705	5272	0.0003	0.0016	0.0074	0.0341	0.1054
GL	RUTH-Score	0.05	5	0	30	50000	2	12	78	522	2397	0	0.0002	0.0016	0.0104	0.0479
GL	RUTH-Score	0.05	5	0.01	30	50000	3	21	143	1086	4217	0.0001	0.0004	0.0029	0.0217	0.0843
GL	RUTH-Score	0.05	5	0.05	30	50000	4304	9761	19329	31908	40560	0.0861	0.1952	0.3866	0.6382	0.8112
GL	RUTH-Score	0.05	5	0.1	30	50000	39108	41866	44123	46207	47584	0.7822	0.8373	0.8825	0.9241	0.9517
GL	RUTH-Score	0.05	5	0.5	30	50000	47480	47891	48349	48840	49158	0.9496	0.9578	0.967	0.9768	0.9832
GL	RUTH-Score	0.05	10	-0.5	30	50000	40482	41085	41860	42891	43784	0.8096	0.8217	0.8372	0.8578	0.8757
GL	RUTH-Score	0.05	10	-0.1	30	50000	40167	40958	41797	42807	43732	0.8033	0.8192	0.8359	0.8561	0.8746
GL	RUTH-Score	0.05	10	-0.05	30	50000	9760	16914	26505	36288	41385	0.1952	0.3383	0.5301	0.7258	0.8277
GL	RUTH-Score	0.05	10	-0.01	30	50000	21	83	387	1801	5628	0.0004	0.0017	0.0077	0.036	0.1126
GL	RUTH-Score	0.05	10	0	30	50000	7	14	73	539	2423	0.0001	0.0003	0.0015	0.0108	0.0485
GL	RUTH-Score	0.05	10	0.01	30	50000	5	14	147	1009	3994	0.0001	0.0003	0.0029	0.0202	0.0799
GL	RUTH-Score	0.05	10	0.05	30	50000	4134	9549	18984	31374	40044	0.0827	0.191	0.3797	0.6275	0.8009
GL	RUTH-Score	0.05	10	0.1	30	50000	38661	41531	43815	45962	47432	0.7732	0.8306	0.8763	0.9192	0.9486
GL	RUTH-Score	0.05	10	0.5	30	50000	47201	47698	48181	48739	49068	0.944	0.954	0.9636	0.9748	0.9814
GL	RUTH-Score	0.1	1	-0.5	30	50000	46488	46745	47031	47419	47782	0.9298	0.9349	0.9406	0.9484	0.9556
GL	RUTH-Score	0.1	1	-0.1	30	50000	46303	46696	47044	47429	47779	0.9261	0.9339	0.9409	0.9486	0.9556
GL	RUTH-Score	0.1	1	-0.05	30	50000	12424	19900	30001	40198	45258	0.2485	0.398	0.6	0.804	0.9052
GL	RUTH-Score	0.1	1	-0.01	30	50000	28	81	330	1638	5322	0.0006	0.0016	0.0066	0.0328	0.1064
GL	RUTH-Score	0.1	1	0	30	50000	6	18	72	521	2390	0.0001	0.0004	0.0014	0.0104	0.0478
GL	RUTH-Score	0.1	1	0.01	30	50000	0	25	176	1203	4500	0	0.0005	0.0035	0.0241	0.09
GL	RUTH-Score	0.1	1	0.05	30	50000	5149	11249	21527	34360	42506	0.103	0.225	0.4305	0.6872	0.8501
GL	RUTH-Score	0.1	1	0.1	30	50000	42180	44602	46358	47803	48565	0.8436	0.892	0.9272	0.9561	0.9713
GL	RUTH-Score	0.1	1	0.5	30	50000	48958	49075	49161	49290	49363	0.9792	0.9815	0.9832	0.9858	0.9873
GL	RUTH-Score	0.1	2	-0.5	30	50000	43253	43749	44325	44987	45641	0.8651	0.875	0.8865	0.8997	0.9128
GL	RUTH-Score	0.1	2	-0.1	30	50000	43032	43689	44276	45007	45655	0.8606	0.8738	0.8855	0.9001	0.9131
GL	RUTH-Score	0.1	2	-0.05	30	50000	10769	18233	27966	37844	43111	0.2154	0.3647	0.5593	0.7569	0.8622
GL	RUTH-Score	0.1	2	-0.01	30	50000	21	74	360	1777	5520	0.0004	0.0015	0.0072	0.0355	0.1104
GL	RUTH-Score	0.1	2	0	30	50000	3	11	68	512	2416	0.0001	0.0002	0.0014	0.0102	0.0483
GL	RUTH-Score	0.1	2	0.01	30	50000	2	17	161	1067	4334	0	0.0003	0.0032	0.0213	0.0867
GL	RUTH-Score	0.1	2	0.05	30	50000	4498	10047	19514	31956	40569	0.09	0.2009	0.3903	0.6391	0.8114
GL	RUTH-Score	0.1	2	0.1	30	50000	38959	41727	44141	46379	47798	0.7792	0.8345	0.8828	0.9276	0.956
GL	RUTH-Score	0.1	2	0.5	30	50000	47389	47750	48122	48512	48776	0.9478	0.955	0.9624	0.9702	0.9755
GL	RUTH-Score	0.1	5	-0.5	30	50000	39449	40130	40939	41944	43006	0.789	0.8026	0.8188	0.8389	0.8601
GL	RUTH-Score	0.1	5	-0.1	30	50000	38900	39737	40617	41771	42854	0.778	0.7947	0.8123	0.8354	0.8571
GL	RUTH-Score	0.1	5	-0.05	30	50000	9303	16127	25343	34961	40263	0.1861	0.3225	0.5069	0.6992	0.8053
GL	RUTH-Score	0.1	5	-0.01	30	50000	20	79	344	1740	5494	0.0004	0.0016	0.0069	0.0348	0.1099
GL	RUTH-Score	0.1	5	0	30	50000	3	17	94	586	2495	0.0001	0.0003	0.0019	0.0117	0.0499
GL	RUTH-Score	0.1	5	0.01	30	50000	3	19	149	974	4056	0.0001	0.0004	0.003	0.0195	0.0811
GL	RUTH-Score	0.1	5	0.05	30	50000	3922	8958	17925	30548	39349	0.0784	0.1792	0.3585	0.611	0.787
GL	RUTH-Score	0.1	5	0.1	30	50000	36816	39861	42624	45214	47091	0.7363	0.7972	0.8525	0.9043	0.9418
GL	RUTH-Score	0.1	5	0.5	30	50000	46491	47097	47723	48371	48796	0.9298	0.9419	0.9545	0.9674	0.9759
GL	RUTH-Score	0.1	10	-0.5	30	50000	37308	38048	38913	40067	41223	0.7462	0.761	0.7783	0.8013	0.8245
GL	RUTH-Score	0.1	10	-0.1	30	50000	36614	37519	38568	39895	41181	0.7323	0.7504	0.7714	0.7979	0.8236
GL	RUTH-Score	0.1	10	-0.05	30	50000	8807	15451	24264	33585	38669	0.1761	0.309	0.4853	0.6717	0.7734
GL	RUTH-Score	0.1	10	-0.01	30	50000	19	86	344	1832	5536	0.0004	0.0017	0.0069	0.0366	0.1107
GL	RUTH-Score	0.1	10	0	30	50000	5	9	83	590	2394	0.0001	0.0002	0.0017	0.0118	0.0479
GL	RUTH-Score	0.1	10	0.01	30	50000	2	14	105	888	3828	0	0.0003	0.0021	0.0178	0.0766
GL	RUTH-Score	0.1	10	0.05	30	50000	3533	8263	16965	29571	38579	0.0707	0.1653	0.3393	0.5914	0.7716
GL	RUTH-Score	0.1	10	0.1	30	50000	36040	39212	42179	44874	46779	0.7208	0.7842	0.8436	0.8975	0.9356
GL	RUTH-Score	0.1	10	0.5	30	50000	46080	46766	47503	48213	48698	0.9216	0.9353	0.9501	0.9643	0.974
GL	RUTH-Score	Combined	1	-0.5	30	250000	232500	233832	235277	237213	239002	0.93	0.9353	0.9411	0.9489	0.956
GL	RUTH-Score	Combined	1	-0.1	30	250000	231699	233612	235254	237166	238963	0.9268	0.9344	0.941	0.9487	0.9559
GL	RUTH-Score	Combined	1	-0.05	30	250000	62507	100195	150342	201219	226330	0.25	0.4008	0.6014	0.8049	0.9053
GL	RUTH-Score	Combined	1	-0.01	30	250000	134	420	1795	8581	26709	0.0005	0.0017	0.0072	0.0343	0.1068
GL	RUTH-Score	Combined	1	0	30	250000	23	78	364	2618	11940	0.0001	0.0003	0.0015	0.0105	0.0478
GL	RUTH-Score	Combined	1	0.01	30	250000	17	103	782	5947	22749	0.0001	0.0004	0.0031	0.0238	0.091
GL	RUTH-Score	Combined	1	0.05	30	250000	25726	56394	107760	171970	212559	0.1029	0.2256	0.431	0.6879	0.8502
GL	RUTH-Score	Combined	1	0.1	30	250000	211387	223128	232157	239170	243043	0.8455	0.8925	0.9286	0.9567	0.9722
GL	RUTH-Score	Combined	1	0.5	30	250000	244940	245602	246148	246785	247278	0.9798	0.9824	0.9846	0.9871	0.9891
GT	RUTH-Score	0.01	1	-0.5	5	50000	45152	45535	45983	46475	47010	0.903	0.9107	0.9197	0.9295	0.9402
GT	RUTH-Score	0.01	1	-0.1	5	50000	17831	20780	25676	33077	39404	0.3566	0.4156	0.5135	0.6615	0.7881
GT	RUTH-Score	0.01	1	-0.05	5	50000	6698	9298	12404	15813	19335	0.134	0.186	0.2481	0.3163	0.3867
GT	RUTH-Score	0.01	1	-0.01	5	50000	853	2097	5324	12817	22351	0.0171	0.0419	0.1065	0.2563	0.447
GT	RUTH-Score	0.01	1	0	5	50000	1100	2968	7108	15697	24723	0.022	0.0594	0.1422	0.3139	0.4945
GT	RUTH-Score	0.01	1	0.01	5	50000	2414	5509	11092	19616	26926	0.0483	0.1102	0.2218	0.3923	0.5385
GT	RUTH-Score	0.01	1	0.05	5	50000	18771	23398	26823	29314	31625	0.3754	0.468	0.5365	0.5863	0.6325
GT	RUTH-Score	0.01	1	0.1	5	50000	29637	31146	33560	37079	40271	0.5927	0.6229	0.6712	0.7416	0.8054
GT	RUTH-Score	0.01	1	0.5	5	50000	46806	47129	47674	48161	48461	0.9361	0.9426	0.9535	0.9632	0.9692
GT	RUTH-Score	0.01	2	-0.5	5	50000	44475	44993	45567	46186	46792	0.8895	0.8999	0.9113	0.9237	0.9358
GT	RUTH-Score	0.01	2	-0.1	5	50000	17136	20135	24997	32560	39051	0.3427	0.4027	0.4999	0.6512	0.781
GT	RUTH-Score	0.01	2	-0.05	5	50000	6384	8886	12008	15610	19209	0.1277	0.1777	0.2402	0.3122	0.3842
GT	RUTH-Score	0.01	2	-0.01	5	50000	846	2205	5513	13102	22541	0.0169	0.0441	0.1103	0.262	0.4508
GT	RUTH-Score	0.01	2	0	5	50000	1223	3172	7574	16123	24971	0.0245	0.0634	0.1515	0.3225	0.4994
GT	RUTH-Score	0.01	2	0.01	5	50000	2526	5619	11119	19766	27146	0.0505	0.1124	0.2224	0.3953	0.5429
GT	RUTH-Score	0.01	2	0.05	5	50000	19059	23533	26866	29339	31624	0.3812	0.4707	0.5373	0.5868	0.6325
GT	RUTH-Score	0.01	2	0.1	5	50000	29628	31080	33536	37049	40139	0.5926	0.6216	0.6707	0.741	0.8028
GT	RUTH-Score	0.01	2	0.5	5	50000	46731	47067	47611	48131	48395	0.9346	0.9413	0.9522	0.9626	0.9679
GT	RUTH-Score	0.01	5	-0.5	5	50000	43777	44400	45057	45851	46551	0.8755	0.888	0.9011	0.917	0.931
GT	RUTH-Score	0.01	5	-0.1	5	50000	16502	19673	24848	32768	39407	0.33	0.3935	0.497	0.6554	0.7881
GT	RUTH-Score	0.01	5	-0.05	5	50000	6139	8685	11702	15248	18800	0.1228	0.1737	0.234	0.305	0.376
GT	RUTH-Score	0.01	5	-0.01	5	50000	804	1990	5164	12497	21929	0.0161	0.0398	0.1033	0.2499	0.4386
GT	RUTH-Score	0.01	5	0	5	50000	1033	2707	6842	15306	24500	0.0207	0.0541	0.1368	0.3061	0.49
GT	RUTH-Score	0.01	5	0.01	5	50000	2233	5087	10594	19195	26808	0.0447	0.1017	0.2119	0.3839	0.5362
GT	RUTH-Score	0.01	5	0.05	5	50000	18298	23000	26552	29223	31497	0.366	0.46	0.531	0.5845	0.6299
GT	RUTH-Score	0.01	5	0.1	5	50000	29489	30913	33358	36955	39995	0.5898	0.6183	0.6672	0.7391	0.7999
GT	RUTH-Score	0.01	5	0.5	5	50000	46675	47026	47519	48081	48392	0.9335	0.9405	0.9504	0.9616	0.9678
GT	RUTH-Score	0.01	10	-0.5	5	50000	43121	43838	44671	45576	46375	0.8624	0.8768	0.8934	0.9115	0.9275
GT	RUTH-Score	0.01	10	-0.1	5	50000	16016	19482	25131	33297	39901	0.3203	0.3896	0.5026	0.6659	0.798
GT	RUTH-Score	0.01	10	-0.05	5	50000	6090	8551	11568	15120	18646	0.1218	0.171	0.2314	0.3024	0.3729
GT	RUTH-Score	0.01	10	-0.01	5	50000	818	1933	4695	11675	20766	0.0164	0.0387	0.0939	0.2335	0.4153
GT	RUTH-Score	0.01	10	0	5	50000	817	2329	6062	14122	23387	0.0163	0.0466	0.1212	0.2824	0.4677
GT	RUTH-Score	0.01	10	0.01	5	50000	1745	4313	9455	18262	26212	0.0349	0.0863	0.1891	0.3652	0.5242
GT	RUTH-Score	0.01	10	0.05	5	50000	17245	22195	26185	28990	31378	0.3449	0.4439	0.5237	0.5798	0.6276
GT	RUTH-Score	0.01	10	0.1	5	50000	29293	30740	33043	36487	39656	0.5859	0.6148	0.6609	0.7297	0.7931
GT	RUTH-Score	0.01	10	0.5	5	50000	46685	47006	47496	48039	48377	0.9337	0.9401	0.9499	0.9608	0.9675
GT	RUTH-Score	0.02	1	-0.5	5	50000	45165	45526	45970	46481	47015	0.9033	0.9105	0.9194	0.9296	0.9403
GT	RUTH-Score	0.02	1	-0.1	5	50000	17798	20700	25495	32906	39254	0.356	0.414	0.5099	0.6581	0.7851
GT	RUTH-Score	0.02	1	-0.05	5	50000	6666	9281	12427	15976	19549	0.1333	0.1856	0.2485	0.3195	0.391
GT	RUTH-Score	0.02	1	-0.01	5	50000	767	2051	5328	12943	22428	0.0153	0.041	0.1066	0.2589	0.4486
GT	RUTH-Score	0.02	1	0	5	50000	1111	3025	7334	15869	25017	0.0222	0.0605	0.1467	0.3174	0.5003
GT	RUTH-Score	0.02	1	0.01	5	50000	2607	5752	11325	19760	27154	0.0521	0.115	0.2265	0.3952	0.5431
GT	RUTH-Score	0.02	1	0.05	5	50000	19041	23428	26843	29361	31545	0.3808	0.4686	0.5369	0.5872	0.6309
GT	RUTH-Score	0.02	1	0.1	5	50000	29572	31126	33654	37168	40301	0.5914	0.6225	0.6731	0.7434	0.806
GT	RUTH-Score	0.02	1	0.5	5	50000	46790	47133	47661	48161	48426	0.9358	0.9427	0.9532	0.9632	0.9685
GT	RUTH-Score	0.02	2	-0.5	5	50000	44141	44679	45315	46020	46693	0.8828	0.8936	0.9063	0.9204	0.9339
GT	RUTH-Score	0.02	2	-0.1	5	50000	16690	19715	24630	32290	38956	0.3338	0.3943	0.4926	0.6458	0.7791
GT	RUTH-Score	0.02	2	-0.05	5	50000	6292	8852	11841	15384	18951	0.1258	0.177	0.2368	0.3077	0.379
GT	RUTH-Score	0.02	2	-0.01	5	50000	893	2138	5259	12664	22152	0.0179	0.0428	0.1052	0.2533	0.443
GT	RUTH-Score	0.02	2	0	5	50000	1082	2898	7272	15610	24731	0.0216	0.058	0.1454	0.3122	0.4946
GT	RUTH-Score	0.02	2	0.01	5	50000	2183	5196	10785	19332	26965	0.0437	0.1039	0.2157	0.3866	0.5393
GT	RUTH-Score	0.02	2	0.05	5	50000	18336	23017	26664	29141	31362	0.3667	0.4603	0.5333	0.5828	0.6272
GT	RUTH-Score	0.02	2	0.1	5	50000	29382	30787	33067	36513	39675	0.5876	0.6157	0.6613	0.7303	0.7935
GT	RUTH-Score	0.02	2	0.5	5	50000	46655	47015	47491	48085	48396	0.9331	0.9403	0.9498	0.9617	0.9679
GT	RUTH-Score	0.02	5	-0.5	5	50000	42762	43563	44380	45411	46202	0.8552	0.8713	0.8876	0.9082	0.924
GT	RUTH-Score	0.02	5	-0.1	5	50000	15447	18595	23806	31754	38504	0.3089	0.3719	0.4761	0.6351	0.7701
GT	RUTH-Score	0.02	5	-0.05	5	50000	5943	8441	11370	14843	18521	0.1189	0.1688	0.2274	0.2969	0.3704
GT	RUTH-Score	0.02	5	-0.01	5	50000	833	2104	5439	12850	22221	0.0167	0.0421	0.1088	0.257	0.4444
GT	RUTH-Score	0.02	5	0	5	50000	1077	3037	7354	15766	24770	0.0215	0.0607	0.1471	0.3153	0.4954
GT	RUTH-Score	0.02	5	0.01	5	50000	2285	5355	10841	19649	27154	0.0457	0.1071	0.2168	0.393	0.5431
GT	RUTH-Score	0.02	5	0.05	5	50000	18221	22849	26531	29152	31364	0.3644	0.457	0.5306	0.583	0.6273
GT	RUTH-Score	0.02	5	0.1	5	50000	29281	30668	33080	36481	39596	0.5856	0.6134	0.6616	0.7296	0.7919
GT	RUTH-Score	0.02	5	0.5	5	50000	46555	46915	47408	47972	48316	0.9311	0.9383	0.9482	0.9594	0.9663
GT	RUTH-Score	0.02	10	-0.5	5	50000	41833	42754	43770	44995	45976	0.8367	0.8551	0.8754	0.8999	0.9195
GT	RUTH-Score	0.02	10	-0.1	5	50000	14628	17999	23431	31629	38575	0.2926	0.36	0.4686	0.6326	0.7715
GT	RUTH-Score	0.02	10	-0.05	5	50000	5733	8174	11169	14667	18204	0.1147	0.1635	0.2234	0.2933	0.3641
GT	RUTH-Score	0.02	10	-0.01	5	50000	857	2104	5288	12634	22055	0.0171	0.0421	0.1058	0.2527	0.4411
GT	RUTH-Score	0.02	10	0	5	50000	982	2764	6849	15192	24492	0.0196	0.0553	0.137	0.3038	0.4898
GT	RUTH-Score	0.02	10	0.01	5	50000	2057	4873	10408	19114	26950	0.0411	0.0975	0.2082	0.3823	0.539
GT	RUTH-Score	0.02	10	0.05	5	50000	17917	22654	26394	29083	31236	0.3583	0.4531	0.5279	0.5817	0.6247
GT	RUTH-Score	0.02	10	0.1	5	50000	29218	30442	32634	36015	39090	0.5844	0.6088	0.6527	0.7203	0.7818
GT	RUTH-Score	0.02	10	0.5	5	50000	46496	46880	47310	47917	48296	0.9299	0.9376	0.9462	0.9583	0.9659
GT	RUTH-Score	0.03	1	-0.5	5	50000	45150	45551	46003	46518	47059	0.903	0.911	0.9201	0.9304	0.9412
GT	RUTH-Score	0.03	1	-0.1	5	50000	17925	20833	25666	33150	39484	0.3585	0.4167	0.5133	0.663	0.7897
GT	RUTH-Score	0.03	1	-0.05	5	50000	6552	9225	12362	15918	19406	0.131	0.1845	0.2472	0.3184	0.3881
GT	RUTH-Score	0.03	1	-0.01	5	50000	832	2138	5380	12954	22308	0.0166	0.0428	0.1076	0.2591	0.4462
GT	RUTH-Score	0.03	1	0	5	50000	1091	2953	7211	15659	24754	0.0218	0.0591	0.1442	0.3132	0.4951
GT	RUTH-Score	0.03	1	0.01	5	50000	2563	5582	11109	19696	26896	0.0513	0.1116	0.2222	0.3939	0.5379
GT	RUTH-Score	0.03	1	0.05	5	50000	18990	23503	26897	29447	31703	0.3798	0.4701	0.5379	0.5889	0.6341
GT	RUTH-Score	0.03	1	0.1	5	50000	29666	31244	33801	37415	40505	0.5933	0.6249	0.676	0.7483	0.8101
GT	RUTH-Score	0.03	1	0.5	5	50000	46836	47170	47693	48175	48440	0.9367	0.9434	0.9539	0.9635	0.9688
GT	RUTH-Score	0.03	2	-0.5	5	50000	43840	44435	45068	45866	46553	0.8768	0.8887	0.9014	0.9173	0.9311
GT	RUTH-Score	0.03	2	-0.1	5	50000	16117	19005	23661	31176	37872	0.3223	0.3801	0.4732	0.6235	0.7574
GT	RUTH-Score	0.03	2	-0.05	5	50000	6348	8933	11878	15473	19075	0.127	0.1787	0.2376	0.3095	0.3815
GT	RUTH-Score	0.03	2	-0.01	5	50000	1004	2409	5899	13745	23308	0.0201	0.0482	0.118	0.2749	0.4662
GT	RUTH-Score	0.03	2	0	5	50000	1356	3363	7976	16650	25623	0.0271	0.0673	0.1595	0.333	0.5125
GT	RUTH-Score	0.03	2	0.01	5	50000	2570	5753	11473	20324	27703	0.0514	0.1151	0.2295	0.4065	0.5541
GT	RUTH-Score	0.03	2	0.05	5	50000	18746	23259	26694	29186	31304	0.3749	0.4652	0.5339	0.5837	0.6261
GT	RUTH-Score	0.03	2	0.1	5	50000	29235	30455	32676	36012	39192	0.5847	0.6091	0.6535	0.7202	0.7838
GT	RUTH-Score	0.03	2	0.5	5	50000	46560	46938	47433	48005	48358	0.9312	0.9388	0.9487	0.9601	0.9672
GT	RUTH-Score	0.03	5	-0.5	5	50000	41863	42758	43732	44891	45895	0.8373	0.8552	0.8746	0.8978	0.9179
GT	RUTH-Score	0.03	5	-0.1	5	50000	14814	18250	23910	32256	39031	0.2963	0.365	0.4782	0.6451	0.7806
GT	RUTH-Score	0.03	5	-0.05	5	50000	5568	8055	10981	14559	18222	0.1114	0.1611	0.2196	0.2912	0.3644
GT	RUTH-Score	0.03	5	-0.01	5	50000	829	1959	4796	11788	21191	0.0166	0.0392	0.0959	0.2358	0.4238
GT	RUTH-Score	0.03	5	0	5	50000	878	2460	6243	14380	23718	0.0176	0.0492	0.1249	0.2876	0.4744
GT	RUTH-Score	0.03	5	0.01	5	50000	1694	4300	9434	18288	26382	0.0339	0.086	0.1887	0.3658	0.5276
GT	RUTH-Score	0.03	5	0.05	5	50000	17103	22138	26204	28962	31281	0.3421	0.4428	0.5241	0.5792	0.6256
GT	RUTH-Score	0.03	5	0.1	5	50000	29193	30497	32732	36147	39234	0.5839	0.6099	0.6546	0.7229	0.7847
GT	RUTH-Score	0.03	5	0.5	5	50000	46474	46878	47369	47925	48269	0.9295	0.9376	0.9474	0.9585	0.9654
GT	RUTH-Score	0.03	10	-0.5	5	50000	40392	41482	42712	44157	45395	0.8078	0.8296	0.8542	0.8831	0.9079
GT	RUTH-Score	0.03	10	-0.1	5	50000	13687	16920	22234	30327	37529	0.2737	0.3384	0.4447	0.6065	0.7506
GT	RUTH-Score	0.03	10	-0.05	5	50000	5413	7842	10794	14420	17973	0.1083	0.1568	0.2159	0.2884	0.3595
GT	RUTH-Score	0.03	10	-0.01	5	50000	969	2346	5717	13301	22758	0.0194	0.0469	0.1143	0.266	0.4552
GT	RUTH-Score	0.03	10	0	5	50000	1161	3060	7304	15803	25020	0.0232	0.0612	0.1461	0.3161	0.5004
GT	RUTH-Score	0.03	10	0.01	5	50000	2319	5386	10995	19598	27339	0.0464	0.1077	0.2199	0.392	0.5468
GT	RUTH-Score	0.03	10	0.05	5	50000	17994	22637	26335	28981	31160	0.3599	0.4527	0.5267	0.5796	0.6232
GT	RUTH-Score	0.03	10	0.1	5	50000	29050	30331	32460	35780	38916	0.581	0.6066	0.6492	0.7156	0.7783
GT	RUTH-Score	0.03	10	0.5	5	50000	46311	46759	47165	47749	48190	0.9262	0.9352	0.9433	0.955	0.9638
GT	RUTH-Score	0.05	1	-0.5	5	50000	45181	45548	46005	46470	47027	0.9036	0.911	0.9201	0.9294	0.9405
GT	RUTH-Score	0.05	1	-0.1	5	50000	17730	20630	25338	32780	39371	0.3546	0.4126	0.5068	0.6556	0.7874
GT	RUTH-Score	0.05	1	-0.05	5	50000	6682	9256	12323	15798	19351	0.1336	0.1851	0.2465	0.316	0.387
GT	RUTH-Score	0.05	1	-0.01	5	50000	830	2140	5420	13053	22421	0.0166	0.0428	0.1084	0.2611	0.4484
GT	RUTH-Score	0.05	1	0	5	50000	1121	2949	7224	15817	24906	0.0224	0.059	0.1445	0.3163	0.4981
GT	RUTH-Score	0.05	1	0.01	5	50000	2409	5529	11050	19650	27119	0.0482	0.1106	0.221	0.393	0.5424
GT	RUTH-Score	0.05	1	0.05	5	50000	18858	23383	26817	29374	31560	0.3772	0.4677	0.5363	0.5875	0.6312
GT	RUTH-Score	0.05	1	0.1	5	50000	29636	31186	33614	37124	40235	0.5927	0.6237	0.6723	0.7425	0.8047
GT	RUTH-Score	0.05	1	0.5	5	50000	46818	47154	47663	48182	48422	0.9364	0.9431	0.9533	0.9636	0.9684
GT	RUTH-Score	0.05	2	-0.5	5	50000	43128	43836	44614	45512	46303	0.8626	0.8767	0.8923	0.9102	0.9261
GT	RUTH-Score	0.05	2	-0.1	5	50000	15619	18675	23685	31559	38326	0.3124	0.3735	0.4737	0.6312	0.7665
GT	RUTH-Score	0.05	2	-0.05	5	50000	5908	8364	11395	15006	18584	0.1182	0.1673	0.2279	0.3001	0.3717
GT	RUTH-Score	0.05	2	-0.01	5	50000	941	2268	5523	13086	22495	0.0188	0.0454	0.1105	0.2617	0.4499
GT	RUTH-Score	0.05	2	0	5	50000	1110	2926	7259	15774	25015	0.0222	0.0585	0.1452	0.3155	0.5003
GT	RUTH-Score	0.05	2	0.01	5	50000	2144	5053	10626	19425	27272	0.0429	0.1011	0.2125	0.3885	0.5454
GT	RUTH-Score	0.05	2	0.05	5	50000	17854	22650	26378	29032	31213	0.3571	0.453	0.5276	0.5806	0.6243
GT	RUTH-Score	0.05	2	0.1	5	50000	29078	30378	32614	35930	39120	0.5816	0.6076	0.6523	0.7186	0.7824
GT	RUTH-Score	0.05	2	0.5	5	50000	46519	46920	47436	48021	48348	0.9304	0.9384	0.9487	0.9604	0.967
GT	RUTH-Score	0.05	5	-0.5	5	50000	40108	41129	42344	43862	45135	0.8022	0.8226	0.8469	0.8772	0.9027
GT	RUTH-Score	0.05	5	-0.1	5	50000	13507	16992	22712	31222	38383	0.2701	0.3398	0.4542	0.6244	0.7677
GT	RUTH-Score	0.05	5	-0.05	5	50000	5196	7580	10475	13982	17707	0.1039	0.1516	0.2095	0.2796	0.3541
GT	RUTH-Score	0.05	5	-0.01	5	50000	873	1995	4812	11652	21013	0.0175	0.0399	0.0962	0.233	0.4203
GT	RUTH-Score	0.05	5	0	5	50000	892	2415	6240	14381	23956	0.0178	0.0483	0.1248	0.2876	0.4791
GT	RUTH-Score	0.05	5	0.01	5	50000	1715	4466	9746	18697	26830	0.0343	0.0893	0.1949	0.3739	0.5366
GT	RUTH-Score	0.05	5	0.05	5	50000	16718	21902	26033	28972	31312	0.3344	0.438	0.5207	0.5794	0.6262
GT	RUTH-Score	0.05	5	0.1	5	50000	28949	30163	32206	35633	38679	0.579	0.6033	0.6441	0.7127	0.7736
GT	RUTH-Score	0.05	5	0.5	5	50000	46187	46682	47190	47816	48200	0.9237	0.9336	0.9438	0.9563	0.964
GT	RUTH-Score	0.05	10	-0.5	5	50000	37968	39174	40668	42593	44211	0.7594	0.7835	0.8134	0.8519	0.8842
GT	RUTH-Score	0.05	10	-0.1	5	50000	12185	15493	20906	29360	36680	0.2437	0.3099	0.4181	0.5872	0.7336
GT	RUTH-Score	0.05	10	-0.05	5	50000	4891	7102	9955	13483	17412	0.0978	0.142	0.1991	0.2697	0.3482
GT	RUTH-Score	0.05	10	-0.01	5	50000	912	2251	5605	13189	22458	0.0182	0.045	0.1121	0.2638	0.4492
GT	RUTH-Score	0.05	10	0	5	50000	1155	2980	7356	15918	25047	0.0231	0.0596	0.1471	0.3184	0.5009
GT	RUTH-Score	0.05	10	0.01	5	50000	2274	5346	11030	19579	27313	0.0455	0.1069	0.2206	0.3916	0.5463
GT	RUTH-Score	0.05	10	0.05	5	50000	17834	22580	26204	28895	31072	0.3567	0.4516	0.5241	0.5779	0.6214
GT	RUTH-Score	0.05	10	0.1	5	50000	28969	30140	32233	35536	38613	0.5794	0.6028	0.6447	0.7107	0.7723
GT	RUTH-Score	0.05	10	0.5	5	50000	46115	46663	47092	47703	48113	0.9223	0.9333	0.9418	0.9541	0.9623
GT	RUTH-Score	0.1	1	-0.5	5	50000	45128	45564	46006	46519	47049	0.9026	0.9113	0.9201	0.9304	0.941
GT	RUTH-Score	0.1	1	-0.1	5	50000	17797	20766	25664	33066	39479	0.3559	0.4153	0.5133	0.6613	0.7896
GT	RUTH-Score	0.1	1	-0.05	5	50000	6721	9210	12337	15883	19296	0.1344	0.1842	0.2467	0.3177	0.3859
GT	RUTH-Score	0.1	1	-0.01	5	50000	853	2135	5333	12708	22106	0.0171	0.0427	0.1067	0.2542	0.4421
GT	RUTH-Score	0.1	1	0	5	50000	1012	2776	7006	15530	24602	0.0202	0.0555	0.1401	0.3106	0.492
GT	RUTH-Score	0.1	1	0.01	5	50000	2327	5274	10909	19530	27071	0.0465	0.1055	0.2182	0.3906	0.5414
GT	RUTH-Score	0.1	1	0.05	5	50000	18715	23148	26656	29278	31632	0.3743	0.463	0.5331	0.5856	0.6326
GT	RUTH-Score	0.1	1	0.1	5	50000	29530	31070	33520	36966	40150	0.5906	0.6214	0.6704	0.7393	0.803
GT	RUTH-Score	0.1	1	0.5	5	50000	46793	47116	47654	48154	48445	0.9359	0.9423	0.9531	0.9631	0.9689
GT	RUTH-Score	0.1	2	-0.5	5	50000	41354	42179	43155	44406	45534	0.8271	0.8436	0.8631	0.8881	0.9107
GT	RUTH-Score	0.1	2	-0.1	5	50000	14440	17730	23154	31376	38223	0.2888	0.3546	0.4631	0.6275	0.7645
GT	RUTH-Score	0.1	2	-0.05	5	50000	5464	7797	10701	14376	18157	0.1093	0.1559	0.214	0.2875	0.3631
GT	RUTH-Score	0.1	2	-0.01	5	50000	827	2033	4972	12045	21255	0.0165	0.0407	0.0994	0.2409	0.4251
GT	RUTH-Score	0.1	2	0	5	50000	888	2448	6280	14584	23911	0.0178	0.049	0.1256	0.2917	0.4782
GT	RUTH-Score	0.1	2	0.01	5	50000	1802	4464	9649	18447	26466	0.036	0.0893	0.193	0.3689	0.5293
GT	RUTH-Score	0.1	2	0.05	5	50000	16724	21727	25909	28927	31294	0.3345	0.4345	0.5182	0.5785	0.6259
GT	RUTH-Score	0.1	2	0.1	5	50000	28877	30187	32378	35710	38912	0.5775	0.6037	0.6476	0.7142	0.7782
GT	RUTH-Score	0.1	2	0.5	5	50000	46568	46955	47438	48044	48363	0.9314	0.9391	0.9488	0.9609	0.9673
GT	RUTH-Score	0.1	5	-0.5	5	50000	36365	37530	39073	41063	42907	0.7273	0.7506	0.7815	0.8213	0.8581
GT	RUTH-Score	0.1	5	-0.1	5	50000	11179	14456	19819	28278	35715	0.2236	0.2891	0.3964	0.5656	0.7143
GT	RUTH-Score	0.1	5	-0.05	5	50000	4610	6731	9420	12912	16739	0.0922	0.1346	0.1884	0.2582	0.3348
GT	RUTH-Score	0.1	5	-0.01	5	50000	858	2088	5046	12110	21432	0.0172	0.0418	0.1009	0.2422	0.4286
GT	RUTH-Score	0.1	5	0	5	50000	974	2576	6458	15006	24282	0.0195	0.0515	0.1292	0.3001	0.4856
GT	RUTH-Score	0.1	5	0.01	5	50000	1712	4239	9584	18713	26898	0.0342	0.0848	0.1917	0.3743	0.538
GT	RUTH-Score	0.1	5	0.05	5	50000	15883	21089	25534	28680	30987	0.3177	0.4218	0.5107	0.5736	0.6197
GT	RUTH-Score	0.1	5	0.1	5	50000	28518	29539	31313	34523	37655	0.5704	0.5908	0.6263	0.6905	0.7531
GT	RUTH-Score	0.1	5	0.5	5	50000	45821	46415	46984	47656	48096	0.9164	0.9283	0.9397	0.9531	0.9619
GT	RUTH-Score	0.1	10	-0.5	5	50000	32789	34080	35893	38410	40782	0.6558	0.6816	0.7179	0.7682	0.8156
GT	RUTH-Score	0.1	10	-0.1	5	50000	9948	13106	18292	26599	34218	0.199	0.2621	0.3658	0.532	0.6844
GT	RUTH-Score	0.1	10	-0.05	5	50000	4053	5967	8475	11974	15952	0.0811	0.1193	0.1695	0.2395	0.319
GT	RUTH-Score	0.1	10	-0.01	5	50000	919	2103	4923	11805	20971	0.0184	0.0421	0.0985	0.2361	0.4194
GT	RUTH-Score	0.1	10	0	5	50000	881	2420	6234	14573	24001	0.0176	0.0484	0.1247	0.2915	0.48
GT	RUTH-Score	0.1	10	0.01	5	50000	1537	3922	9170	18347	26806	0.0307	0.0784	0.1834	0.3669	0.5361
GT	RUTH-Score	0.1	10	0.05	5	50000	15306	20624	25269	28579	30950	0.3061	0.4125	0.5054	0.5716	0.619
GT	RUTH-Score	0.1	10	0.1	5	50000	28400	29456	31183	34298	37397	0.568	0.5891	0.6237	0.686	0.7479
GT	RUTH-Score	0.1	10	0.5	5	50000	45592	46242	46829	47482	47937	0.9118	0.9248	0.9366	0.9496	0.9587
GT	RUTH-Score	Combined	1	-0.5	5	250000	225776	227724	229967	232463	235160	0.9031	0.9109	0.9199	0.9299	0.9406
GT	RUTH-Score	Combined	1	-0.1	5	250000	89081	103709	127839	164979	196992	0.3563	0.4148	0.5114	0.6599	0.788
GT	RUTH-Score	Combined	1	-0.05	5	250000	33319	46270	61853	79388	96937	0.1333	0.1851	0.2474	0.3176	0.3877
GT	RUTH-Score	Combined	1	-0.01	5	250000	4135	10561	26785	64475	111614	0.0165	0.0422	0.1071	0.2579	0.4465
GT	RUTH-Score	Combined	1	0	5	250000	5435	14671	35883	78572	124002	0.0217	0.0587	0.1435	0.3143	0.496
GT	RUTH-Score	Combined	1	0.01	5	250000	12320	27646	55485	98252	135166	0.0493	0.1106	0.2219	0.393	0.5407
GT	RUTH-Score	Combined	1	0.05	5	250000	94375	116860	134036	146774	158065	0.3775	0.4674	0.5361	0.5871	0.6323
GT	RUTH-Score	Combined	1	0.1	5	250000	148041	155772	168149	185752	201462	0.5922	0.6231	0.6726	0.743	0.8058
GT	RUTH-Score	Combined	1	0.5	5	250000	234043	235702	238345	240833	242194	0.9362	0.9428	0.9534	0.9633	0.9688
GT	RUTH-Score	0.01	1	-0.5	30	50000	46521	46776	47057	47432	47768	0.9304	0.9355	0.9411	0.9486	0.9554
GT	RUTH-Score	0.01	1	-0.1	30	50000	46360	46706	47034	47444	47772	0.9272	0.9341	0.9407	0.9489	0.9554
GT	RUTH-Score	0.01	1	-0.05	30	50000	15925	23561	32972	41842	45934	0.3185	0.4712	0.6594	0.8368	0.9187
GT	RUTH-Score	0.01	1	-0.01	30	50000	73	244	855	3243	8427	0.0015	0.0049	0.0171	0.0649	0.1685
GT	RUTH-Score	0.01	1	0	30	50000	12	44	179	939	3459	0.0002	0.0009	0.0036	0.0188	0.0692
GT	RUTH-Score	0.01	1	0.01	30	50000	4	19	140	869	3423	0.0001	0.0004	0.0028	0.0174	0.0685
GT	RUTH-Score	0.01	1	0.05	30	50000	3661	8272	16734	29074	38137	0.0732	0.1654	0.3347	0.5815	0.7627
GT	RUTH-Score	0.01	1	0.1	30	50000	39499	42641	45178	47060	48026	0.79	0.8528	0.9036	0.9412	0.9605
GT	RUTH-Score	0.01	1	0.5	30	50000	48832	48979	49094	49192	49281	0.9766	0.9796	0.9819	0.9838	0.9856
GT	RUTH-Score	0.01	2	-0.5	30	50000	45815	46124	46519	46984	47418	0.9163	0.9225	0.9304	0.9397	0.9484
GT	RUTH-Score	0.01	2	-0.1	30	50000	45637	46087	46513	46972	47399	0.9127	0.9217	0.9303	0.9394	0.948
GT	RUTH-Score	0.01	2	-0.05	30	50000	15158	22604	31937	40938	45355	0.3032	0.4521	0.6387	0.8188	0.9071
GT	RUTH-Score	0.01	2	-0.01	30	50000	73	213	827	3230	8245	0.0015	0.0043	0.0165	0.0646	0.1649
GT	RUTH-Score	0.01	2	0	30	50000	11	47	185	948	3465	0.0002	0.0009	0.0037	0.019	0.0693
GT	RUTH-Score	0.01	2	0.01	30	50000	5	19	150	924	3698	0.0001	0.0004	0.003	0.0185	0.074
GT	RUTH-Score	0.01	2	0.05	30	50000	3857	8574	17031	29066	37955	0.0771	0.1715	0.3406	0.5813	0.7591
GT	RUTH-Score	0.01	2	0.1	30	50000	39150	42291	44905	46856	47903	0.783	0.8458	0.8981	0.9371	0.9581
GT	RUTH-Score	0.01	2	0.5	30	50000	48780	48899	49044	49165	49249	0.9756	0.978	0.9809	0.9833	0.985
GT	RUTH-Score	0.01	5	-0.5	30	50000	45033	45446	45891	46475	46977	0.9007	0.9089	0.9178	0.9295	0.9395
GT	RUTH-Score	0.01	5	-0.1	30	50000	44824	45373	45873	46465	46990	0.8965	0.9075	0.9175	0.9293	0.9398
GT	RUTH-Score	0.01	5	-0.05	30	50000	14152	21654	31135	40312	44838	0.283	0.4331	0.6227	0.8062	0.8968
GT	RUTH-Score	0.01	5	-0.01	30	50000	76	261	893	3269	8372	0.0015	0.0052	0.0179	0.0654	0.1674
GT	RUTH-Score	0.01	5	0	30	50000	10	36	195	953	3469	0.0002	0.0007	0.0039	0.0191	0.0694
GT	RUTH-Score	0.01	5	0.01	30	50000	5	27	152	975	3736	0.0001	0.0005	0.003	0.0195	0.0747
GT	RUTH-Score	0.01	5	0.05	30	50000	3722	8321	16605	28589	37577	0.0744	0.1664	0.3321	0.5718	0.7515
GT	RUTH-Score	0.01	5	0.1	30	50000	38671	41914	44596	46628	47793	0.7734	0.8383	0.8919	0.9326	0.9559
GT	RUTH-Score	0.01	5	0.5	30	50000	48685	48839	48997	49148	49268	0.9737	0.9768	0.9799	0.983	0.9854
GT	RUTH-Score	0.01	10	-0.5	30	50000	44516	44952	45461	46114	46663	0.8903	0.899	0.9092	0.9223	0.9333
GT	RUTH-Score	0.01	10	-0.1	30	50000	44407	44962	45524	46158	46732	0.8881	0.8992	0.9105	0.9232	0.9346
GT	RUTH-Score	0.01	10	-0.05	30	50000	15219	23146	32405	40872	45060	0.3044	0.4629	0.6481	0.8174	0.9012
GT	RUTH-Score	0.01	10	-0.01	30	50000	94	274	961	3511	9117	0.0019	0.0055	0.0192	0.0702	0.1823
GT	RUTH-Score	0.01	10	0	30	50000	9	38	174	1017	3735	0.0002	0.0008	0.0035	0.0203	0.0747
GT	RUTH-Score	0.01	10	0.01	30	50000	1	12	104	774	3302	0	0.0002	0.0021	0.0155	0.066
GT	RUTH-Score	0.01	10	0.05	30	50000	3197	7584	15565	27734	37283	0.0639	0.1517	0.3113	0.5547	0.7457
GT	RUTH-Score	0.01	10	0.1	30	50000	38649	41972	44625	46694	47771	0.773	0.8394	0.8925	0.9339	0.9554
GT	RUTH-Score	0.01	10	0.5	30	50000	48696	48847	48996	49141	49235	0.9739	0.9769	0.9799	0.9828	0.9847
GT	RUTH-Score	0.02	1	-0.5	30	50000	46496	46766	47060	47440	47749	0.9299	0.9353	0.9412	0.9488	0.955
GT	RUTH-Score	0.02	1	-0.1	30	50000	46343	46721	47055	47423	47763	0.9269	0.9344	0.9411	0.9485	0.9553
GT	RUTH-Score	0.02	1	-0.05	30	50000	15754	23504	32857	41761	45808	0.3151	0.4701	0.6571	0.8352	0.9162
GT	RUTH-Score	0.02	1	-0.01	30	50000	90	274	894	3310	8479	0.0018	0.0055	0.0179	0.0662	0.1696
GT	RUTH-Score	0.02	1	0	30	50000	12	33	179	961	3458	0.0002	0.0007	0.0036	0.0192	0.0692
GT	RUTH-Score	0.02	1	0.01	30	50000	3	16	108	887	3613	0.0001	0.0003	0.0022	0.0177	0.0723
GT	RUTH-Score	0.02	1	0.05	30	50000	3635	8332	16736	28957	38058	0.0727	0.1666	0.3347	0.5791	0.7612
GT	RUTH-Score	0.02	1	0.1	30	50000	39387	42581	45072	47028	48011	0.7877	0.8516	0.9014	0.9406	0.9602
GT	RUTH-Score	0.02	1	0.5	30	50000	48800	48953	49064	49150	49208	0.976	0.9791	0.9813	0.983	0.9842
GT	RUTH-Score	0.02	2	-0.5	30	50000	45439	45802	46204	46726	47186	0.9088	0.916	0.9241	0.9345	0.9437
GT	RUTH-Score	0.02	2	-0.1	30	50000	45266	45739	46191	46743	47179	0.9053	0.9148	0.9238	0.9349	0.9436
GT	RUTH-Score	0.02	2	-0.05	30	50000	14572	22403	31751	40709	45118	0.2914	0.4481	0.635	0.8142	0.9024
GT	RUTH-Score	0.02	2	-0.01	30	50000	71	236	840	3313	8494	0.0014	0.0047	0.0168	0.0663	0.1699
GT	RUTH-Score	0.02	2	0	30	50000	17	47	185	947	3427	0.0003	0.0009	0.0037	0.0189	0.0685
GT	RUTH-Score	0.02	2	0.01	30	50000	3	27	105	798	3441	0.0001	0.0005	0.0021	0.016	0.0688
GT	RUTH-Score	0.02	2	0.05	30	50000	3555	8079	16553	28616	37666	0.0711	0.1616	0.3311	0.5723	0.7533
GT	RUTH-Score	0.02	2	0.1	30	50000	38617	41829	44579	46666	47841	0.7723	0.8366	0.8916	0.9333	0.9568
GT	RUTH-Score	0.02	2	0.5	30	50000	48742	48895	49046	49145	49208	0.9748	0.9779	0.9809	0.9829	0.9842
GT	RUTH-Score	0.02	5	-0.5	30	50000	44207	44692	45270	45920	46521	0.8841	0.8938	0.9054	0.9184	0.9304
GT	RUTH-Score	0.02	5	-0.1	30	50000	44033	44666	45287	45923	46540	0.8807	0.8933	0.9057	0.9185	0.9308
GT	RUTH-Score	0.02	5	-0.05	30	50000	13962	21484	30801	39828	44366	0.2792	0.4297	0.616	0.7966	0.8873
GT	RUTH-Score	0.02	5	-0.01	30	50000	78	224	847	3288	8508	0.0016	0.0045	0.0169	0.0658	0.1702
GT	RUTH-Score	0.02	5	0	30	50000	16	46	172	944	3394	0.0003	0.0009	0.0034	0.0189	0.0679
GT	RUTH-Score	0.02	5	0.01	30	50000	5	18	144	953	3646	0.0001	0.0004	0.0029	0.0191	0.0729
GT	RUTH-Score	0.02	5	0.05	30	50000	3573	8344	16834	28512	37521	0.0715	0.1669	0.3367	0.5702	0.7504
GT	RUTH-Score	0.02	5	0.1	30	50000	38300	41625	44297	46483	47651	0.766	0.8325	0.8859	0.9297	0.953
GT	RUTH-Score	0.02	5	0.5	30	50000	48662	48815	48965	49120	49226	0.9732	0.9763	0.9793	0.9824	0.9845
GT	RUTH-Score	0.02	10	-0.5	30	50000	43373	43891	44567	45361	46064	0.8675	0.8778	0.8913	0.9072	0.9213
GT	RUTH-Score	0.02	10	-0.1	30	50000	43191	43867	44634	45395	46102	0.8638	0.8773	0.8927	0.9079	0.922
GT	RUTH-Score	0.02	10	-0.05	30	50000	13954	21606	31001	39794	44220	0.2791	0.4321	0.62	0.7959	0.8844
GT	RUTH-Score	0.02	10	-0.01	30	50000	80	276	971	3590	8853	0.0016	0.0055	0.0194	0.0718	0.1771
GT	RUTH-Score	0.02	10	0	30	50000	11	48	234	1020	3509	0.0002	0.001	0.0047	0.0204	0.0702
GT	RUTH-Score	0.02	10	0.01	30	50000	3	16	109	801	3297	0.0001	0.0003	0.0022	0.016	0.0659
GT	RUTH-Score	0.02	10	0.05	30	50000	3209	7463	15448	27333	36753	0.0642	0.1493	0.309	0.5467	0.7351
GT	RUTH-Score	0.02	10	0.1	30	50000	38096	41390	44236	46389	47560	0.7619	0.8278	0.8847	0.9278	0.9512
GT	RUTH-Score	0.02	10	0.5	30	50000	48579	48759	48931	49077	49216	0.9716	0.9752	0.9786	0.9815	0.9843
GT	RUTH-Score	0.03	1	-0.5	30	50000	46481	46736	47021	47423	47760	0.9296	0.9347	0.9404	0.9485	0.9552
GT	RUTH-Score	0.03	1	-0.1	30	50000	46341	46708	47016	47413	47748	0.9268	0.9342	0.9403	0.9483	0.955
GT	RUTH-Score	0.03	1	-0.05	30	50000	15787	23534	33078	41812	45829	0.3157	0.4707	0.6616	0.8362	0.9166
GT	RUTH-Score	0.03	1	-0.01	30	50000	73	261	919	3363	8533	0.0015	0.0052	0.0184	0.0673	0.1707
GT	RUTH-Score	0.03	1	0	30	50000	13	42	185	974	3423	0.0003	0.0008	0.0037	0.0195	0.0685
GT	RUTH-Score	0.03	1	0.01	30	50000	4	23	114	851	3435	0.0001	0.0005	0.0023	0.017	0.0687
GT	RUTH-Score	0.03	1	0.05	30	50000	3532	8278	16790	28983	38159	0.0706	0.1656	0.3358	0.5797	0.7632
GT	RUTH-Score	0.03	1	0.1	30	50000	39557	42656	45113	47059	48020	0.7911	0.8531	0.9023	0.9412	0.9604
GT	RUTH-Score	0.03	1	0.5	30	50000	48795	48934	49047	49141	49204	0.9759	0.9787	0.9809	0.9828	0.9841
GT	RUTH-Score	0.03	2	-0.5	30	50000	45165	45575	46014	46536	47044	0.9033	0.9115	0.9203	0.9307	0.9409
GT	RUTH-Score	0.03	2	-0.1	30	50000	45062	45523	45985	46518	47011	0.9012	0.9105	0.9197	0.9304	0.9402
GT	RUTH-Score	0.03	2	-0.05	30	50000	14646	22383	31875	40834	45065	0.2929	0.4477	0.6375	0.8167	0.9013
GT	RUTH-Score	0.03	2	-0.01	30	50000	76	236	840	3240	8390	0.0015	0.0047	0.0168	0.0648	0.1678
GT	RUTH-Score	0.03	2	0	30	50000	10	47	208	988	3449	0.0002	0.0009	0.0042	0.0198	0.069
GT	RUTH-Score	0.03	2	0.01	30	50000	1	16	120	906	3454	0	0.0003	0.0024	0.0181	0.0691
GT	RUTH-Score	0.03	2	0.05	30	50000	3269	7792	16065	28328	37710	0.0654	0.1558	0.3213	0.5666	0.7542
GT	RUTH-Score	0.03	2	0.1	30	50000	38583	41890	44490	46608	47794	0.7717	0.8378	0.8898	0.9322	0.9559
GT	RUTH-Score	0.03	2	0.5	30	50000	48740	48883	49021	49118	49204	0.9748	0.9777	0.9804	0.9824	0.9841
GT	RUTH-Score	0.03	5	-0.5	30	50000	43549	44075	44706	45474	46138	0.871	0.8815	0.8941	0.9095	0.9228
GT	RUTH-Score	0.03	5	-0.1	30	50000	43369	44020	44668	45431	46114	0.8674	0.8804	0.8934	0.9086	0.9223
GT	RUTH-Score	0.03	5	-0.05	30	50000	13668	21113	30578	39567	44060	0.2734	0.4223	0.6116	0.7913	0.8812
GT	RUTH-Score	0.03	5	-0.01	30	50000	75	242	901	3302	8415	0.0015	0.0048	0.018	0.066	0.1683
GT	RUTH-Score	0.03	5	0	30	50000	9	56	195	932	3396	0.0002	0.0011	0.0039	0.0186	0.0679
GT	RUTH-Score	0.03	5	0.01	30	50000	1	16	118	888	3562	0	0.0003	0.0024	0.0178	0.0712
GT	RUTH-Score	0.03	5	0.05	30	50000	3471	7986	16040	28152	37273	0.0694	0.1597	0.3208	0.563	0.7455
GT	RUTH-Score	0.03	5	0.1	30	50000	37914	41256	44067	46325	47605	0.7583	0.8251	0.8813	0.9265	0.9521
GT	RUTH-Score	0.03	5	0.5	30	50000	48610	48793	48956	49114	49214	0.9722	0.9759	0.9791	0.9823	0.9843
GT	RUTH-Score	0.03	10	-0.5	30	50000	42527	43127	43878	44751	45572	0.8505	0.8625	0.8776	0.895	0.9114
GT	RUTH-Score	0.03	10	-0.1	30	50000	42333	43030	43771	44663	45500	0.8467	0.8606	0.8754	0.8933	0.91
GT	RUTH-Score	0.03	10	-0.05	30	50000	13532	21246	30567	39294	43747	0.2706	0.4249	0.6113	0.7859	0.8749
GT	RUTH-Score	0.03	10	-0.01	30	50000	83	283	970	3562	8931	0.0017	0.0057	0.0194	0.0712	0.1786
GT	RUTH-Score	0.03	10	0	30	50000	14	42	201	1049	3613	0.0003	0.0008	0.004	0.021	0.0723
GT	RUTH-Score	0.03	10	0.01	30	50000	6	16	105	823	3322	0.0001	0.0003	0.0021	0.0165	0.0664
GT	RUTH-Score	0.03	10	0.05	30	50000	3312	7617	15544	27280	36698	0.0662	0.1523	0.3109	0.5456	0.734
GT	RUTH-Score	0.03	10	0.1	30	50000	37635	40988	43922	46226	47480	0.7527	0.8198	0.8784	0.9245	0.9496
GT	RUTH-Score	0.03	10	0.5	30	50000	48580	48731	48891	49059	49186	0.9716	0.9746	0.9778	0.9812	0.9837
GT	RUTH-Score	0.05	1	-0.5	30	50000	46479	46719	47009	47416	47750	0.9296	0.9344	0.9402	0.9483	0.955
GT	RUTH-Score	0.05	1	-0.1	30	50000	46344	46711	47040	47404	47746	0.9269	0.9342	0.9408	0.9481	0.9549
GT	RUTH-Score	0.05	1	-0.05	30	50000	15727	23330	32706	41542	45708	0.3145	0.4666	0.6541	0.8308	0.9142
GT	RUTH-Score	0.05	1	-0.01	30	50000	79	237	841	3238	8372	0.0016	0.0047	0.0168	0.0648	0.1674
GT	RUTH-Score	0.05	1	0	30	50000	11	49	194	940	3452	0.0002	0.001	0.0039	0.0188	0.069
GT	RUTH-Score	0.05	1	0.01	30	50000	5	18	115	847	3542	0.0001	0.0004	0.0023	0.0169	0.0708
GT	RUTH-Score	0.05	1	0.05	30	50000	3689	8309	16719	28915	38106	0.0738	0.1662	0.3344	0.5783	0.7621
GT	RUTH-Score	0.05	1	0.1	30	50000	39439	42538	45022	46982	47988	0.7888	0.8508	0.9004	0.9396	0.9598
GT	RUTH-Score	0.05	1	0.5	30	50000	48813	48940	49036	49115	49159	0.9763	0.9788	0.9807	0.9823	0.9832
GT	RUTH-Score	0.05	2	-0.5	30	50000	44573	45008	45518	46105	46688	0.8915	0.9002	0.9104	0.9221	0.9338
GT	RUTH-Score	0.05	2	-0.1	30	50000	44413	44951	45492	46117	46665	0.8883	0.899	0.9098	0.9223	0.9333
GT	RUTH-Score	0.05	2	-0.05	30	50000	14581	22355	31617	40407	44714	0.2916	0.4471	0.6323	0.8081	0.8943
GT	RUTH-Score	0.05	2	-0.01	30	50000	72	251	892	3303	8517	0.0014	0.005	0.0178	0.0661	0.1703
GT	RUTH-Score	0.05	2	0	30	50000	11	45	167	909	3422	0.0002	0.0009	0.0033	0.0182	0.0684
GT	RUTH-Score	0.05	2	0.01	30	50000	5	22	102	816	3397	0.0001	0.0004	0.002	0.0163	0.0679
GT	RUTH-Score	0.05	2	0.05	30	50000	3318	7719	15820	27815	37291	0.0664	0.1544	0.3164	0.5563	0.7458
GT	RUTH-Score	0.05	2	0.1	30	50000	37975	41345	44155	46528	47764	0.7595	0.8269	0.8831	0.9306	0.9553
GT	RUTH-Score	0.05	2	0.5	30	50000	48696	48855	49012	49105	49172	0.9739	0.9771	0.9802	0.9821	0.9834
GT	RUTH-Score	0.05	5	-0.5	30	50000	42302	42898	43593	44492	45350	0.846	0.858	0.8719	0.8898	0.907
GT	RUTH-Score	0.05	5	-0.1	30	50000	42033	42802	43556	44511	45326	0.8407	0.856	0.8711	0.8902	0.9065
GT	RUTH-Score	0.05	5	-0.05	30	50000	12559	20076	29264	38338	43121	0.2512	0.4015	0.5853	0.7668	0.8624
GT	RUTH-Score	0.05	5	-0.01	30	50000	77	250	850	3122	8204	0.0015	0.005	0.017	0.0624	0.1641
GT	RUTH-Score	0.05	5	0	30	50000	14	42	210	988	3446	0.0003	0.0008	0.0042	0.0198	0.0689
GT	RUTH-Score	0.05	5	0.01	30	50000	4	20	134	862	3448	0.0001	0.0004	0.0027	0.0172	0.069
GT	RUTH-Score	0.05	5	0.05	30	50000	3108	7435	15472	27153	36443	0.0622	0.1487	0.3094	0.5431	0.7289
GT	RUTH-Score	0.05	5	0.1	30	50000	36881	40316	43441	45979	47364	0.7376	0.8063	0.8688	0.9196	0.9473
GT	RUTH-Score	0.05	5	0.5	30	50000	48545	48738	48892	49036	49140	0.9709	0.9748	0.9778	0.9807	0.9828
GT	RUTH-Score	0.05	10	-0.5	30	50000	40867	41547	42426	43469	44498	0.8173	0.8309	0.8485	0.8694	0.89
GT	RUTH-Score	0.05	10	-0.1	30	50000	40575	41429	42319	43390	44473	0.8115	0.8286	0.8464	0.8678	0.8895
GT	RUTH-Score	0.05	10	-0.05	30	50000	12081	19476	28695	37714	42466	0.2416	0.3895	0.5739	0.7543	0.8493
GT	RUTH-Score	0.05	10	-0.01	30	50000	76	246	881	3307	8412	0.0015	0.0049	0.0176	0.0661	0.1682
GT	RUTH-Score	0.05	10	0	30	50000	11	36	209	1033	3582	0.0002	0.0007	0.0042	0.0207	0.0716
GT	RUTH-Score	0.05	10	0.01	30	50000	7	20	121	851	3371	0.0001	0.0004	0.0024	0.017	0.0674
GT	RUTH-Score	0.05	10	0.05	30	50000	3135	7423	15314	26917	36153	0.0627	0.1485	0.3063	0.5383	0.7231
GT	RUTH-Score	0.05	10	0.1	30	50000	36599	40123	43182	45776	47200	0.732	0.8025	0.8636	0.9155	0.944
GT	RUTH-Score	0.05	10	0.5	30	50000	48446	48657	48829	49019	49140	0.9689	0.9731	0.9766	0.9804	0.9828
GT	RUTH-Score	0.1	1	-0.5	30	50000	46486	46742	47014	47405	47739	0.9297	0.9348	0.9403	0.9481	0.9548
GT	RUTH-Score	0.1	1	-0.1	30	50000	46300	46676	47003	47399	47735	0.926	0.9335	0.9401	0.948	0.9547
GT	RUTH-Score	0.1	1	-0.05	30	50000	15599	23076	32422	41368	45654	0.312	0.4615	0.6484	0.8274	0.9131
GT	RUTH-Score	0.1	1	-0.01	30	50000	78	243	839	3154	8319	0.0016	0.0049	0.0168	0.0631	0.1664
GT	RUTH-Score	0.1	1	0	30	50000	19	54	198	978	3440	0.0004	0.0011	0.004	0.0196	0.0688
GT	RUTH-Score	0.1	1	0.01	30	50000	3	23	133	936	3620	0.0001	0.0005	0.0027	0.0187	0.0724
GT	RUTH-Score	0.1	1	0.05	30	50000	3869	8583	16971	29129	38109	0.0774	0.1717	0.3394	0.5826	0.7622
GT	RUTH-Score	0.1	1	0.1	30	50000	39323	42485	45010	46962	47976	0.7865	0.8497	0.9002	0.9392	0.9595
GT	RUTH-Score	0.1	1	0.5	30	50000	48764	48914	49027	49100	49137	0.9753	0.9783	0.9805	0.982	0.9827
GT	RUTH-Score	0.1	2	-0.5	30	50000	43454	43961	44508	45219	45914	0.8691	0.8792	0.8902	0.9044	0.9183
GT	RUTH-Score	0.1	2	-0.1	30	50000	43206	43845	44474	45237	45913	0.8641	0.8769	0.8895	0.9047	0.9183
GT	RUTH-Score	0.1	2	-0.05	30	50000	13453	20990	30237	39287	43840	0.2691	0.4198	0.6047	0.7857	0.8768
GT	RUTH-Score	0.1	2	-0.01	30	50000	71	220	803	3247	8355	0.0014	0.0044	0.0161	0.0649	0.1671
GT	RUTH-Score	0.1	2	0	30	50000	12	34	167	914	3358	0.0002	0.0007	0.0033	0.0183	0.0672
GT	RUTH-Score	0.1	2	0.01	30	50000	3	19	116	860	3543	0.0001	0.0004	0.0023	0.0172	0.0709
GT	RUTH-Score	0.1	2	0.05	30	50000	3408	7747	15730	27390	36803	0.0682	0.1549	0.3146	0.5478	0.7361
GT	RUTH-Score	0.1	2	0.1	30	50000	36853	40418	43680	46230	47645	0.7371	0.8084	0.8736	0.9246	0.9529
GT	RUTH-Score	0.1	2	0.5	30	50000	48702	48867	48988	49074	49145	0.974	0.9773	0.9798	0.9815	0.9829
GT	RUTH-Score	0.1	5	-0.5	30	50000	39692	40456	41314	42454	43606	0.7938	0.8091	0.8263	0.8491	0.8721
GT	RUTH-Score	0.1	5	-0.1	30	50000	39129	40032	41042	42259	43499	0.7826	0.8006	0.8208	0.8452	0.87
GT	RUTH-Score	0.1	5	-0.05	30	50000	11289	18246	27350	36511	41380	0.2258	0.3649	0.547	0.7302	0.8276
GT	RUTH-Score	0.1	5	-0.01	30	50000	69	214	785	3131	8177	0.0014	0.0043	0.0157	0.0626	0.1635
GT	RUTH-Score	0.1	5	0	30	50000	17	53	200	1009	3441	0.0003	0.0011	0.004	0.0202	0.0688
GT	RUTH-Score	0.1	5	0.01	30	50000	6	13	135	784	3254	0.0001	0.0003	0.0027	0.0157	0.0651
GT	RUTH-Score	0.1	5	0.05	30	50000	2850	6884	14555	26244	35692	0.057	0.1377	0.2911	0.5249	0.7138
GT	RUTH-Score	0.1	5	0.1	30	50000	35452	39172	42514	45412	47037	0.709	0.7834	0.8503	0.9082	0.9407
GT	RUTH-Score	0.1	5	0.5	30	50000	48485	48690	48871	49013	49114	0.9697	0.9738	0.9774	0.9803	0.9823
GT	RUTH-Score	0.1	10	-0.5	30	50000	37490	38287	39283	40589	42008	0.7498	0.7657	0.7857	0.8118	0.8402
GT	RUTH-Score	0.1	10	-0.1	30	50000	36831	37826	38950	40439	41909	0.7366	0.7565	0.779	0.8088	0.8382
GT	RUTH-Score	0.1	10	-0.05	30	50000	10644	17564	26287	35042	39846	0.2129	0.3513	0.5257	0.7008	0.7969
GT	RUTH-Score	0.1	10	-0.01	30	50000	72	223	817	3166	8189	0.0014	0.0045	0.0163	0.0633	0.1638
GT	RUTH-Score	0.1	10	0	30	50000	12	40	228	1054	3494	0.0002	0.0008	0.0046	0.0211	0.0699
GT	RUTH-Score	0.1	10	0.01	30	50000	2	9	100	759	3190	0	0.0002	0.002	0.0152	0.0638
GT	RUTH-Score	0.1	10	0.05	30	50000	2591	6330	13602	25413	35076	0.0518	0.1266	0.272	0.5083	0.7015
GT	RUTH-Score	0.1	10	0.1	30	50000	34775	38589	42052	45110	46712	0.6955	0.7718	0.841	0.9022	0.9342
GT	RUTH-Score	0.1	10	0.5	30	50000	48245	48517	48722	48916	49064	0.9649	0.9703	0.9744	0.9783	0.9813
GT	RUTH-Score	Combined	1	-0.5	30	250000	232463	233739	235161	237116	238766	0.9299	0.935	0.9406	0.9485	0.9551
GT	RUTH-Score	Combined	1	-0.1	30	250000	231688	233522	235148	237083	238764	0.9268	0.9341	0.9406	0.9483	0.9551
GT	RUTH-Score	Combined	1	-0.05	30	250000	78792	117005	164035	208325	228933	0.3152	0.468	0.6561	0.8333	0.9157
GT	RUTH-Score	Combined	1	-0.01	30	250000	393	1259	4348	16308	42130	0.0016	0.005	0.0174	0.0652	0.1685
GT	RUTH-Score	Combined	1	0	30	250000	67	222	935	4792	17232	0.0003	0.0009	0.0037	0.0192	0.0689
GT	RUTH-Score	Combined	1	0.01	30	250000	19	99	610	4390	17633	0.0001	0.0004	0.0024	0.0176	0.0705
GT	RUTH-Score	Combined	1	0.05	30	250000	18386	41774	83950	145058	190569	0.0735	0.1671	0.3358	0.5802	0.7623
GT	RUTH-Score	Combined	1	0.1	30	250000	197205	212901	225395	235091	240021	0.7888	0.8516	0.9016	0.9404	0.9601
GT	RUTH-Score	Combined	1	0.5	30	250000	244004	244720	245268	245698	245989	0.976	0.9789	0.9811	0.9828	0.984
GL	RUTH-LRT	0.01	1	-0.5	5	50000	42227	42958	43805	44874	45894	0.8445	0.8592	0.8761	0.8975	0.9179
GL	RUTH-LRT	0.01	1	-0.1	5	50000	35079	40060	43084	44799	45894	0.7016	0.8012	0.8617	0.896	0.9179
GL	RUTH-LRT	0.01	1	-0.05	5	50000	1089	3391	9264	21289	32759	0.0218	0.0678	0.1853	0.4258	0.6552
GL	RUTH-LRT	0.01	1	-0.01	5	50000	1	8	82	655	2871	0	0.0002	0.0016	0.0131	0.0574
GL	RUTH-LRT	0.01	1	0	5	50000	1	7	46	545	2614	0	0.0001	0.0009	0.0109	0.0523
GL	RUTH-LRT	0.01	1	0.01	5	50000	6	34	300	1702	5526	0.0001	0.0007	0.006	0.034	0.1105
GL	RUTH-LRT	0.01	1	0.05	5	50000	3084	7323	15795	28497	38353	0.0617	0.1465	0.3159	0.5699	0.7671
GL	RUTH-LRT	0.01	1	0.1	5	50000	37908	42468	45603	47631	48598	0.7582	0.8494	0.9121	0.9526	0.972
GL	RUTH-LRT	0.01	1	0.5	5	50000	49531	49574	49635	49700	49758	0.9906	0.9915	0.9927	0.994	0.9952
GL	RUTH-LRT	0.01	2	-0.5	5	50000	41428	42193	43114	44271	45326	0.8286	0.8439	0.8623	0.8854	0.9065
GL	RUTH-LRT	0.01	2	-0.1	5	50000	34147	39206	42302	44149	45299	0.6829	0.7841	0.846	0.883	0.906
GL	RUTH-LRT	0.01	2	-0.05	5	50000	1123	3455	9211	20965	32262	0.0225	0.0691	0.1842	0.4193	0.6452
GL	RUTH-LRT	0.01	2	-0.01	5	50000	0	5	60	595	2903	0	0.0001	0.0012	0.0119	0.0581
GL	RUTH-LRT	0.01	2	0	5	50000	1	8	75	558	2701	0	0.0002	0.0015	0.0112	0.054
GL	RUTH-LRT	0.01	2	0.01	5	50000	4	40	271	1682	5612	0.0001	0.0008	0.0054	0.0336	0.1122
GL	RUTH-LRT	0.01	2	0.05	5	50000	3086	7508	15854	28597	38240	0.0617	0.1502	0.3171	0.5719	0.7648
GL	RUTH-LRT	0.01	2	0.1	5	50000	37699	42344	45511	47603	48561	0.754	0.8469	0.9102	0.9521	0.9712
GL	RUTH-LRT	0.01	2	0.5	5	50000	49562	49619	49683	49756	49813	0.9912	0.9924	0.9937	0.9951	0.9963
GL	RUTH-LRT	0.01	5	-0.5	5	50000	40556	41396	42403	43570	44756	0.8111	0.8279	0.8481	0.8714	0.8951
GL	RUTH-LRT	0.01	5	-0.1	5	50000	33288	38362	41514	43421	44720	0.6658	0.7672	0.8303	0.8684	0.8944
GL	RUTH-LRT	0.01	5	-0.05	5	50000	1120	3338	9078	20675	31886	0.0224	0.0668	0.1816	0.4135	0.6377
GL	RUTH-LRT	0.01	5	-0.01	5	50000	0	7	62	592	2903	0	0.0001	0.0012	0.0118	0.0581
GL	RUTH-LRT	0.01	5	0	5	50000	0	7	68	573	2591	0	0.0001	0.0014	0.0115	0.0518
GL	RUTH-LRT	0.01	5	0.01	5	50000	6	44	269	1653	5583	0.0001	0.0009	0.0054	0.0331	0.1117
GL	RUTH-LRT	0.01	5	0.05	5	50000	2933	7177	15348	28024	37874	0.0587	0.1435	0.307	0.5605	0.7575
GL	RUTH-LRT	0.01	5	0.1	5	50000	37461	42131	45275	47469	48500	0.7492	0.8426	0.9055	0.9494	0.97
GL	RUTH-LRT	0.01	5	0.5	5	50000	49617	49689	49740	49823	49874	0.9923	0.9938	0.9948	0.9965	0.9975
GL	RUTH-LRT	0.01	10	-0.5	5	50000	40065	40925	41886	43145	44338	0.8013	0.8185	0.8377	0.8629	0.8868
GL	RUTH-LRT	0.01	10	-0.1	5	50000	32813	37812	41000	42998	44309	0.6563	0.7562	0.82	0.86	0.8862
GL	RUTH-LRT	0.01	10	-0.05	5	50000	1189	3425	9272	20985	32126	0.0238	0.0685	0.1854	0.4197	0.6425
GL	RUTH-LRT	0.01	10	-0.01	5	50000	2	7	80	655	3029	0	0.0001	0.0016	0.0131	0.0606
GL	RUTH-LRT	0.01	10	0	5	50000	0	6	53	510	2567	0	0.0001	0.0011	0.0102	0.0513
GL	RUTH-LRT	0.01	10	0.01	5	50000	8	44	243	1514	5255	0.0002	0.0009	0.0049	0.0303	0.1051
GL	RUTH-LRT	0.01	10	0.05	5	50000	2747	6867	14918	27363	37180	0.0549	0.1373	0.2984	0.5473	0.7436
GL	RUTH-LRT	0.01	10	0.1	5	50000	36678	41702	45203	47381	48448	0.7336	0.834	0.9041	0.9476	0.969
GL	RUTH-LRT	0.01	10	0.5	5	50000	49649	49711	49772	49844	49887	0.993	0.9942	0.9954	0.9969	0.9977
GL	RUTH-LRT	0.02	1	-0.5	5	50000	42229	42941	43822	44892	45838	0.8446	0.8588	0.8764	0.8978	0.9168
GL	RUTH-LRT	0.02	1	-0.1	5	50000	35197	40035	43026	44755	45810	0.7039	0.8007	0.8605	0.8951	0.9162
GL	RUTH-LRT	0.02	1	-0.05	5	50000	1157	3488	9354	21214	32702	0.0231	0.0698	0.1871	0.4243	0.654
GL	RUTH-LRT	0.02	1	-0.01	5	50000	0	7	69	618	2816	0	0.0001	0.0014	0.0124	0.0563
GL	RUTH-LRT	0.02	1	0	5	50000	1	7	54	521	2593	0	0.0001	0.0011	0.0104	0.0519
GL	RUTH-LRT	0.02	1	0.01	5	50000	5	39	264	1606	5641	0.0001	0.0008	0.0053	0.0321	0.1128
GL	RUTH-LRT	0.02	1	0.05	5	50000	3084	7428	15851	28546	38202	0.0617	0.1486	0.317	0.5709	0.764
GL	RUTH-LRT	0.02	1	0.1	5	50000	37954	42512	45688	47616	48547	0.7591	0.8502	0.9138	0.9523	0.9709
GL	RUTH-LRT	0.02	1	0.5	5	50000	49467	49522	49584	49658	49717	0.9893	0.9904	0.9917	0.9932	0.9943
GL	RUTH-LRT	0.02	2	-0.5	5	50000	41044	41823	42778	43986	45046	0.8209	0.8365	0.8556	0.8797	0.9009
GL	RUTH-LRT	0.02	2	-0.1	5	50000	33257	38550	41827	43845	44987	0.6651	0.771	0.8365	0.8769	0.8997
GL	RUTH-LRT	0.02	2	-0.05	5	50000	1076	3239	8875	20474	31853	0.0215	0.0648	0.1775	0.4095	0.6371
GL	RUTH-LRT	0.02	2	-0.01	5	50000	0	1	71	641	2869	0	0	0.0014	0.0128	0.0574
GL	RUTH-LRT	0.02	2	0	5	50000	0	4	45	554	2645	0	0.0001	0.0009	0.0111	0.0529
GL	RUTH-LRT	0.02	2	0.01	5	50000	7	41	261	1758	5674	0.0001	0.0008	0.0052	0.0352	0.1135
GL	RUTH-LRT	0.02	2	0.05	5	50000	2990	7167	15475	28225	37861	0.0598	0.1433	0.3095	0.5645	0.7572
GL	RUTH-LRT	0.02	2	0.1	5	50000	37502	42064	45373	47440	48472	0.75	0.8413	0.9075	0.9488	0.9694
GL	RUTH-LRT	0.02	2	0.5	5	50000	49533	49586	49644	49719	49773	0.9907	0.9917	0.9929	0.9944	0.9955
GL	RUTH-LRT	0.02	5	-0.5	5	50000	39881	40693	41694	42957	44170	0.7976	0.8139	0.8339	0.8591	0.8834
GL	RUTH-LRT	0.02	5	-0.1	5	50000	32178	37285	40584	42699	44118	0.6436	0.7457	0.8117	0.854	0.8824
GL	RUTH-LRT	0.02	5	-0.05	5	50000	1074	3252	9028	20338	31471	0.0215	0.065	0.1806	0.4068	0.6294
GL	RUTH-LRT	0.02	5	-0.01	5	50000	2	9	60	596	2860	0	0.0002	0.0012	0.0119	0.0572
GL	RUTH-LRT	0.02	5	0	5	50000	0	3	61	562	2562	0	0.0001	0.0012	0.0112	0.0512
GL	RUTH-LRT	0.02	5	0.01	5	50000	4	32	240	1595	5437	0.0001	0.0006	0.0048	0.0319	0.1087
GL	RUTH-LRT	0.02	5	0.05	5	50000	2847	7063	15157	27744	37496	0.0569	0.1413	0.3031	0.5549	0.7499
GL	RUTH-LRT	0.02	5	0.1	5	50000	37048	41768	45047	47239	48363	0.741	0.8354	0.9009	0.9448	0.9673
GL	RUTH-LRT	0.02	5	0.5	5	50000	49603	49659	49706	49781	49827	0.9921	0.9932	0.9941	0.9956	0.9965
GL	RUTH-LRT	0.02	10	-0.5	5	50000	39129	39980	41009	42354	43667	0.7826	0.7996	0.8202	0.8471	0.8733
GL	RUTH-LRT	0.02	10	-0.1	5	50000	31634	36575	39809	41977	43512	0.6327	0.7315	0.7962	0.8395	0.8702
GL	RUTH-LRT	0.02	10	-0.05	5	50000	1103	3389	8927	20353	31271	0.0221	0.0678	0.1785	0.4071	0.6254
GL	RUTH-LRT	0.02	10	-0.01	5	50000	1	8	63	646	2971	0	0.0002	0.0013	0.0129	0.0594
GL	RUTH-LRT	0.02	10	0	5	50000	0	6	53	490	2461	0	0.0001	0.0011	0.0098	0.0492
GL	RUTH-LRT	0.02	10	0.01	5	50000	3	41	251	1497	5243	0.0001	0.0008	0.005	0.0299	0.1049
GL	RUTH-LRT	0.02	10	0.05	5	50000	2693	6625	14558	26965	36911	0.0539	0.1325	0.2912	0.5393	0.7382
GL	RUTH-LRT	0.02	10	0.1	5	50000	36467	41387	44909	47234	48305	0.7293	0.8277	0.8982	0.9447	0.9661
GL	RUTH-LRT	0.02	10	0.5	5	50000	49584	49645	49733	49816	49861	0.9917	0.9929	0.9947	0.9963	0.9972
GL	RUTH-LRT	0.03	1	-0.5	5	50000	42223	42968	43840	44922	45874	0.8445	0.8594	0.8768	0.8984	0.9175
GL	RUTH-LRT	0.03	1	-0.1	5	50000	35257	40203	43122	44846	45919	0.7051	0.8041	0.8624	0.8969	0.9184
GL	RUTH-LRT	0.03	1	-0.05	5	50000	1166	3553	9473	21515	32967	0.0233	0.0711	0.1895	0.4303	0.6593
GL	RUTH-LRT	0.03	1	-0.01	5	50000	1	8	63	643	2870	0	0.0002	0.0013	0.0129	0.0574
GL	RUTH-LRT	0.03	1	0	5	50000	2	8	69	559	2648	0	0.0002	0.0014	0.0112	0.053
GL	RUTH-LRT	0.03	1	0.01	5	50000	8	49	299	1642	5613	0.0002	0.001	0.006	0.0328	0.1123
GL	RUTH-LRT	0.03	1	0.05	5	50000	3047	7444	15774	28580	38395	0.0609	0.1489	0.3155	0.5716	0.7679
GL	RUTH-LRT	0.03	1	0.1	5	50000	38075	42588	45697	47606	48517	0.7615	0.8518	0.9139	0.9521	0.9703
GL	RUTH-LRT	0.03	1	0.5	5	50000	49418	49463	49521	49602	49678	0.9884	0.9893	0.9904	0.992	0.9936
GL	RUTH-LRT	0.03	2	-0.5	5	50000	40739	41551	42525	43678	44813	0.8148	0.831	0.8505	0.8736	0.8963
GL	RUTH-LRT	0.03	2	-0.1	5	50000	32443	37886	41357	43454	44704	0.6489	0.7577	0.8271	0.8691	0.8941
GL	RUTH-LRT	0.03	2	-0.05	5	50000	1025	3193	8664	19893	31334	0.0205	0.0639	0.1733	0.3979	0.6267
GL	RUTH-LRT	0.03	2	-0.01	5	50000	0	7	73	612	2689	0	0.0001	0.0015	0.0122	0.0538
GL	RUTH-LRT	0.03	2	0	5	50000	1	8	60	547	2679	0	0.0002	0.0012	0.0109	0.0536
GL	RUTH-LRT	0.03	2	0.01	5	50000	5	45	286	1658	5597	0.0001	0.0009	0.0057	0.0332	0.1119
GL	RUTH-LRT	0.03	2	0.05	5	50000	2838	7064	15174	27857	37612	0.0568	0.1413	0.3035	0.5571	0.7522
GL	RUTH-LRT	0.03	2	0.1	5	50000	36934	41704	45036	47322	48380	0.7387	0.8341	0.9007	0.9464	0.9676
GL	RUTH-LRT	0.03	2	0.5	5	50000	49468	49518	49585	49673	49732	0.9894	0.9904	0.9917	0.9935	0.9946
GL	RUTH-LRT	0.03	5	-0.5	5	50000	39216	40106	41171	42523	43734	0.7843	0.8021	0.8234	0.8505	0.8747
GL	RUTH-LRT	0.03	5	-0.1	5	50000	31344	36442	39859	42102	43657	0.6269	0.7288	0.7972	0.842	0.8731
GL	RUTH-LRT	0.03	5	-0.05	5	50000	1043	3251	8727	19906	30622	0.0209	0.065	0.1745	0.3981	0.6124
GL	RUTH-LRT	0.03	5	-0.01	5	50000	0	9	80	660	2852	0	0.0002	0.0016	0.0132	0.057
GL	RUTH-LRT	0.03	5	0	5	50000	0	7	64	535	2538	0	0.0001	0.0013	0.0107	0.0508
GL	RUTH-LRT	0.03	5	0.01	5	50000	6	40	242	1627	5363	0.0001	0.0008	0.0048	0.0325	0.1073
GL	RUTH-LRT	0.03	5	0.05	5	50000	2692	6761	14789	27317	37141	0.0538	0.1352	0.2958	0.5463	0.7428
GL	RUTH-LRT	0.03	5	0.1	5	50000	36748	41547	44929	47261	48331	0.735	0.8309	0.8986	0.9452	0.9666
GL	RUTH-LRT	0.03	5	0.5	5	50000	49553	49604	49678	49746	49797	0.9911	0.9921	0.9936	0.9949	0.9959
GL	RUTH-LRT	0.03	10	-0.5	5	50000	38312	39170	40236	41658	43030	0.7662	0.7834	0.8047	0.8332	0.8606
GL	RUTH-LRT	0.03	10	-0.1	5	50000	30483	35453	38861	41188	42851	0.6097	0.7091	0.7772	0.8238	0.857
GL	RUTH-LRT	0.03	10	-0.05	5	50000	1059	3196	8843	19716	30516	0.0212	0.0639	0.1769	0.3943	0.6103
GL	RUTH-LRT	0.03	10	-0.01	5	50000	0	8	70	653	2890	0	0.0002	0.0014	0.0131	0.0578
GL	RUTH-LRT	0.03	10	0	5	50000	2	6	50	498	2477	0	0.0001	0.001	0.01	0.0495
GL	RUTH-LRT	0.03	10	0.01	5	50000	6	34	242	1483	5147	0.0001	0.0007	0.0048	0.0297	0.1029
GL	RUTH-LRT	0.03	10	0.05	5	50000	2554	6404	14196	26584	36633	0.0511	0.1281	0.2839	0.5317	0.7327
GL	RUTH-LRT	0.03	10	0.1	5	50000	36151	41117	44741	47147	48300	0.723	0.8223	0.8948	0.9429	0.966
GL	RUTH-LRT	0.03	10	0.5	5	50000	49597	49656	49729	49787	49839	0.9919	0.9931	0.9946	0.9957	0.9968
GL	RUTH-LRT	0.05	1	-0.5	5	50000	42215	42954	43816	44910	45870	0.8443	0.8591	0.8763	0.8982	0.9174
GL	RUTH-LRT	0.05	1	-0.1	5	50000	34800	39958	43025	44786	45831	0.696	0.7992	0.8605	0.8957	0.9166
GL	RUTH-LRT	0.05	1	-0.05	5	50000	1145	3396	9130	21264	32654	0.0229	0.0679	0.1826	0.4253	0.6531
GL	RUTH-LRT	0.05	1	-0.01	5	50000	2	14	67	592	2896	0	0.0003	0.0013	0.0118	0.0579
GL	RUTH-LRT	0.05	1	0	5	50000	0	8	69	565	2651	0	0.0002	0.0014	0.0113	0.053
GL	RUTH-LRT	0.05	1	0.01	5	50000	2	43	254	1651	5645	0	0.0009	0.0051	0.033	0.1129
GL	RUTH-LRT	0.05	1	0.05	5	50000	3153	7585	15692	28442	38161	0.0631	0.1517	0.3138	0.5688	0.7632
GL	RUTH-LRT	0.05	1	0.1	5	50000	37823	42451	45605	47548	48466	0.7565	0.849	0.9121	0.951	0.9693
GL	RUTH-LRT	0.05	1	0.5	5	50000	49409	49460	49509	49604	49660	0.9882	0.9892	0.9902	0.9921	0.9932
GL	RUTH-LRT	0.05	2	-0.5	5	50000	40310	41123	42030	43245	44420	0.8062	0.8225	0.8406	0.8649	0.8884
GL	RUTH-LRT	0.05	2	-0.1	5	50000	31944	37304	40763	43001	44319	0.6389	0.7461	0.8153	0.86	0.8864
GL	RUTH-LRT	0.05	2	-0.05	5	50000	1025	3213	8631	19891	30915	0.0205	0.0643	0.1726	0.3978	0.6183
GL	RUTH-LRT	0.05	2	-0.01	5	50000	0	3	56	569	2759	0	0.0001	0.0011	0.0114	0.0552
GL	RUTH-LRT	0.05	2	0	5	50000	1	11	73	587	2667	0	0.0002	0.0015	0.0117	0.0533
GL	RUTH-LRT	0.05	2	0.01	5	50000	6	34	231	1568	5454	0.0001	0.0007	0.0046	0.0314	0.1091
GL	RUTH-LRT	0.05	2	0.05	5	50000	2833	6950	14973	27549	37253	0.0567	0.139	0.2995	0.551	0.7451
GL	RUTH-LRT	0.05	2	0.1	5	50000	36822	41644	45018	47248	48315	0.7364	0.8329	0.9004	0.945	0.9663
GL	RUTH-LRT	0.05	2	0.5	5	50000	49427	49495	49560	49634	49695	0.9885	0.9899	0.9912	0.9927	0.9939
GL	RUTH-LRT	0.05	5	-0.5	5	50000	38287	39220	40215	41589	42904	0.7657	0.7844	0.8043	0.8318	0.8581
GL	RUTH-LRT	0.05	5	-0.1	5	50000	30002	34988	38642	41102	42741	0.6	0.6998	0.7728	0.822	0.8548
GL	RUTH-LRT	0.05	5	-0.05	5	50000	935	3074	8361	19120	29847	0.0187	0.0615	0.1672	0.3824	0.5969
GL	RUTH-LRT	0.05	5	-0.01	5	50000	1	5	66	581	2826	0	0.0001	0.0013	0.0116	0.0565
GL	RUTH-LRT	0.05	5	0	5	50000	1	4	52	517	2564	0	0.0001	0.001	0.0103	0.0513
GL	RUTH-LRT	0.05	5	0.01	5	50000	5	47	265	1520	5393	0.0001	0.0009	0.0053	0.0304	0.1079
GL	RUTH-LRT	0.05	5	0.05	5	50000	2713	6698	14595	27070	36909	0.0543	0.134	0.2919	0.5414	0.7382
GL	RUTH-LRT	0.05	5	0.1	5	50000	35915	40899	44579	46959	48225	0.7183	0.818	0.8916	0.9392	0.9645
GL	RUTH-LRT	0.05	5	0.5	5	50000	49529	49593	49649	49727	49772	0.9906	0.9919	0.993	0.9945	0.9954
GL	RUTH-LRT	0.05	10	-0.5	5	50000	37055	38015	39123	40529	41880	0.7411	0.7603	0.7825	0.8106	0.8376
GL	RUTH-LRT	0.05	10	-0.1	5	50000	29401	34039	37292	39780	41516	0.588	0.6808	0.7458	0.7956	0.8303
GL	RUTH-LRT	0.05	10	-0.05	5	50000	1037	3174	8619	19253	29759	0.0207	0.0635	0.1724	0.3851	0.5952
GL	RUTH-LRT	0.05	10	-0.01	5	50000	0	4	76	653	2907	0	0.0001	0.0015	0.0131	0.0581
GL	RUTH-LRT	0.05	10	0	5	50000	0	5	57	500	2438	0	0.0001	0.0011	0.01	0.0488
GL	RUTH-LRT	0.05	10	0.01	5	50000	7	39	258	1501	5080	0.0001	0.0008	0.0052	0.03	0.1016
GL	RUTH-LRT	0.05	10	0.05	5	50000	2519	6476	14249	26602	36492	0.0504	0.1295	0.285	0.532	0.7298
GL	RUTH-LRT	0.05	10	0.1	5	50000	35786	40799	44462	46962	48169	0.7157	0.816	0.8892	0.9392	0.9634
GL	RUTH-LRT	0.05	10	0.5	5	50000	49528	49600	49661	49754	49808	0.9906	0.992	0.9932	0.9951	0.9962
GL	RUTH-LRT	0.1	1	-0.5	5	50000	42208	42941	43805	44865	45843	0.8442	0.8588	0.8761	0.8973	0.9169
GL	RUTH-LRT	0.1	1	-0.1	5	50000	34842	39959	42996	44773	45844	0.6968	0.7992	0.8599	0.8955	0.9169
GL	RUTH-LRT	0.1	1	-0.05	5	50000	1071	3390	9164	21070	32730	0.0214	0.0678	0.1833	0.4214	0.6546
GL	RUTH-LRT	0.1	1	-0.01	5	50000	1	7	68	620	2903	0	0.0001	0.0014	0.0124	0.0581
GL	RUTH-LRT	0.1	1	0	5	50000	0	6	57	541	2596	0	0.0001	0.0011	0.0108	0.0519
GL	RUTH-LRT	0.1	1	0.01	5	50000	8	44	289	1735	5656	0.0002	0.0009	0.0058	0.0347	0.1131
GL	RUTH-LRT	0.1	1	0.05	5	50000	3056	7381	15765	28463	38217	0.0611	0.1476	0.3153	0.5693	0.7643
GL	RUTH-LRT	0.1	1	0.1	5	50000	37781	42402	45555	47608	48489	0.7556	0.848	0.9111	0.9522	0.9698
GL	RUTH-LRT	0.1	1	0.5	5	50000	49357	49405	49451	49518	49580	0.9871	0.9881	0.989	0.9904	0.9916
GL	RUTH-LRT	0.1	2	-0.5	5	50000	39106	40005	40983	42247	43487	0.7821	0.8001	0.8197	0.8449	0.8697
GL	RUTH-LRT	0.1	2	-0.1	5	50000	30474	35779	39445	41914	43436	0.6095	0.7156	0.7889	0.8383	0.8687
GL	RUTH-LRT	0.1	2	-0.05	5	50000	1042	3123	8423	19501	30269	0.0208	0.0625	0.1685	0.39	0.6054
GL	RUTH-LRT	0.1	2	-0.01	5	50000	0	3	56	627	2762	0	0.0001	0.0011	0.0125	0.0552
GL	RUTH-LRT	0.1	2	0	5	50000	0	7	59	529	2566	0	0.0001	0.0012	0.0106	0.0513
GL	RUTH-LRT	0.1	2	0.01	5	50000	7	41	254	1604	5371	0.0001	0.0008	0.0051	0.0321	0.1074
GL	RUTH-LRT	0.1	2	0.05	5	50000	2755	6761	14733	27213	37145	0.0551	0.1352	0.2947	0.5443	0.7429
GL	RUTH-LRT	0.1	2	0.1	5	50000	36245	41177	44795	47170	48314	0.7249	0.8235	0.8959	0.9434	0.9663
GL	RUTH-LRT	0.1	2	0.5	5	50000	49384	49428	49495	49571	49647	0.9877	0.9886	0.9899	0.9914	0.9929
GL	RUTH-LRT	0.1	5	-0.5	5	50000	36104	37027	38145	39530	40949	0.7221	0.7405	0.7629	0.7906	0.819
GL	RUTH-LRT	0.1	5	-0.1	5	50000	26890	31932	35694	38613	40661	0.5378	0.6386	0.7139	0.7723	0.8132
GL	RUTH-LRT	0.1	5	-0.05	5	50000	858	2790	7599	17554	27857	0.0172	0.0558	0.152	0.3511	0.5571
GL	RUTH-LRT	0.1	5	-0.01	5	50000	1	6	58	591	2765	0	0.0001	0.0012	0.0118	0.0553
GL	RUTH-LRT	0.1	5	0	5	50000	2	7	61	545	2506	0	0.0001	0.0012	0.0109	0.0501
GL	RUTH-LRT	0.1	5	0.01	5	50000	7	35	232	1466	5147	0.0001	0.0007	0.0046	0.0293	0.1029
GL	RUTH-LRT	0.1	5	0.05	5	50000	2513	6364	13935	26090	36002	0.0503	0.1273	0.2787	0.5218	0.72
GL	RUTH-LRT	0.1	5	0.1	5	50000	34676	39904	43879	46693	48029	0.6935	0.7981	0.8776	0.9339	0.9606
GL	RUTH-LRT	0.1	5	0.5	5	50000	49441	49489	49559	49642	49702	0.9888	0.9898	0.9912	0.9928	0.994
GL	RUTH-LRT	0.1	10	-0.5	5	50000	34197	35215	36383	37875	39427	0.6839	0.7043	0.7277	0.7575	0.7885
GL	RUTH-LRT	0.1	10	-0.1	5	50000	25226	30015	33685	36652	38798	0.5045	0.6003	0.6737	0.733	0.776
GL	RUTH-LRT	0.1	10	-0.05	5	50000	885	2803	7632	17333	27253	0.0177	0.0561	0.1526	0.3467	0.5451
GL	RUTH-LRT	0.1	10	-0.01	5	50000	0	6	73	626	2918	0	0.0001	0.0015	0.0125	0.0584
GL	RUTH-LRT	0.1	10	0	5	50000	0	7	52	511	2479	0	0.0001	0.001	0.0102	0.0496
GL	RUTH-LRT	0.1	10	0.01	5	50000	6	39	227	1425	4929	0.0001	0.0008	0.0045	0.0285	0.0986
GL	RUTH-LRT	0.1	10	0.05	5	50000	2382	5972	13355	25402	35472	0.0476	0.1194	0.2671	0.508	0.7094
GL	RUTH-LRT	0.1	10	0.1	5	50000	34188	39442	43507	46423	47816	0.6838	0.7888	0.8701	0.9285	0.9563
GL	RUTH-LRT	0.1	10	0.5	5	50000	49493	49555	49630	49714	49774	0.9899	0.9911	0.9926	0.9943	0.9955
GL	RUTH-LRT	Combined	1	-0.5	5	250000	211102	214762	219088	224463	229319	0.8444	0.859	0.8764	0.8979	0.9173
GL	RUTH-LRT	Combined	1	-0.1	5	250000	175175	200215	215253	223959	229298	0.7007	0.8009	0.861	0.8958	0.9172
GL	RUTH-LRT	Combined	1	-0.05	5	250000	5628	17218	46385	106352	163812	0.0225	0.0689	0.1855	0.4254	0.6552
GL	RUTH-LRT	Combined	1	-0.01	5	250000	5	44	349	3128	14356	0	0.0002	0.0014	0.0125	0.0574
GL	RUTH-LRT	Combined	1	0	5	250000	4	36	295	2731	13102	0	0.0001	0.0012	0.0109	0.0524
GL	RUTH-LRT	Combined	1	0.01	5	250000	29	209	1406	8336	28081	0.0001	0.0008	0.0056	0.0333	0.1123
GL	RUTH-LRT	Combined	1	0.05	5	250000	15424	37161	78877	142528	191328	0.0617	0.1486	0.3155	0.5701	0.7653
GL	RUTH-LRT	Combined	1	0.1	5	250000	189541	212421	228148	238009	242617	0.7582	0.8497	0.9126	0.952	0.9705
GL	RUTH-LRT	Combined	1	0.5	5	250000	247182	247424	247700	248082	248393	0.9887	0.9897	0.9908	0.9923	0.9936
GL	RUTH-LRT	0.01	1	-0.5	30	50000	45306	45854	46473	47184	47856	0.9061	0.9171	0.9295	0.9437	0.9571
GL	RUTH-LRT	0.01	1	-0.1	30	50000	45178	45806	46450	47196	47842	0.9036	0.9161	0.929	0.9439	0.9568
GL	RUTH-LRT	0.01	1	-0.05	30	50000	8280	16655	27883	39526	45251	0.1656	0.3331	0.5577	0.7905	0.905
GL	RUTH-LRT	0.01	1	-0.01	30	50000	2	25	228	1384	4983	0	0.0005	0.0046	0.0277	0.0997
GL	RUTH-LRT	0.01	1	0	30	50000	0	5	46	472	2450	0	0.0001	0.0009	0.0094	0.049
GL	RUTH-LRT	0.01	1	0.01	30	50000	3	31	249	1498	5233	0.0001	0.0006	0.005	0.03	0.1047
GL	RUTH-LRT	0.01	1	0.05	30	50000	7194	14340	25309	37609	44523	0.1439	0.2868	0.5062	0.7522	0.8905
GL	RUTH-LRT	0.01	1	0.1	30	50000	46871	48133	48840	49315	49514	0.9374	0.9627	0.9768	0.9863	0.9903
GL	RUTH-LRT	0.01	1	0.5	30	50000	49740	49778	49811	49832	49837	0.9948	0.9956	0.9962	0.9966	0.9967
GL	RUTH-LRT	0.01	2	-0.5	30	50000	44403	45015	45715	46541	47301	0.8881	0.9003	0.9143	0.9308	0.946
GL	RUTH-LRT	0.01	2	-0.1	30	50000	44229	45020	45711	46539	47267	0.8846	0.9004	0.9142	0.9308	0.9453
GL	RUTH-LRT	0.01	2	-0.05	30	50000	7863	15709	26935	38470	44566	0.1573	0.3142	0.5387	0.7694	0.8913
GL	RUTH-LRT	0.01	2	-0.01	30	50000	3	22	190	1370	4899	0.0001	0.0004	0.0038	0.0274	0.098
GL	RUTH-LRT	0.01	2	0	30	50000	0	8	53	494	2441	0	0.0002	0.0011	0.0099	0.0488
GL	RUTH-LRT	0.01	2	0.01	30	50000	5	37	243	1523	5144	0.0001	0.0007	0.0049	0.0305	0.1029
GL	RUTH-LRT	0.01	2	0.05	30	50000	7213	14302	25232	37417	44218	0.1443	0.286	0.5046	0.7483	0.8844
GL	RUTH-LRT	0.01	2	0.1	30	50000	46702	47962	48720	49220	49462	0.934	0.9592	0.9744	0.9844	0.9892
GL	RUTH-LRT	0.01	2	0.5	30	50000	49752	49809	49848	49866	49873	0.995	0.9962	0.997	0.9973	0.9975
GL	RUTH-LRT	0.01	5	-0.5	30	50000	43474	44127	44880	45812	46609	0.8695	0.8825	0.8976	0.9162	0.9322
GL	RUTH-LRT	0.01	5	-0.1	30	50000	43224	44040	44845	45756	46603	0.8645	0.8808	0.8969	0.9151	0.9321
GL	RUTH-LRT	0.01	5	-0.05	30	50000	7354	15097	26179	37834	43887	0.1471	0.3019	0.5236	0.7567	0.8777
GL	RUTH-LRT	0.01	5	-0.01	30	50000	4	24	193	1378	4991	0.0001	0.0005	0.0039	0.0276	0.0998
GL	RUTH-LRT	0.01	5	0	30	50000	0	3	48	480	2417	0	0.0001	0.001	0.0096	0.0483
GL	RUTH-LRT	0.01	5	0.01	30	50000	2	42	243	1494	5173	0	0.0008	0.0049	0.0299	0.1035
GL	RUTH-LRT	0.01	5	0.05	30	50000	6840	13878	24571	36923	43931	0.1368	0.2776	0.4914	0.7385	0.8786
GL	RUTH-LRT	0.01	5	0.1	30	50000	46433	47824	48644	49206	49487	0.9287	0.9565	0.9729	0.9841	0.9897
GL	RUTH-LRT	0.01	5	0.5	30	50000	49804	49851	49878	49897	49905	0.9961	0.997	0.9976	0.9979	0.9981
GL	RUTH-LRT	0.01	10	-0.5	30	50000	42877	43561	44366	45316	46180	0.8575	0.8712	0.8873	0.9063	0.9236
GL	RUTH-LRT	0.01	10	-0.1	30	50000	42688	43490	44377	45298	46190	0.8538	0.8698	0.8875	0.906	0.9238
GL	RUTH-LRT	0.01	10	-0.05	30	50000	7804	15664	26593	37852	43592	0.1561	0.3133	0.5319	0.757	0.8718
GL	RUTH-LRT	0.01	10	-0.01	30	50000	5	34	217	1438	5243	0.0001	0.0007	0.0043	0.0288	0.1049
GL	RUTH-LRT	0.01	10	0	30	50000	0	4	48	509	2491	0	0.0001	0.001	0.0102	0.0498
GL	RUTH-LRT	0.01	10	0.01	30	50000	3	32	189	1354	4981	0.0001	0.0006	0.0038	0.0271	0.0996
GL	RUTH-LRT	0.01	10	0.05	30	50000	6629	13524	24262	36545	43882	0.1326	0.2705	0.4852	0.7309	0.8776
GL	RUTH-LRT	0.01	10	0.1	30	50000	46362	47715	48547	49160	49456	0.9272	0.9543	0.9709	0.9832	0.9891
GL	RUTH-LRT	0.01	10	0.5	30	50000	49837	49868	49902	49943	49950	0.9967	0.9974	0.998	0.9989	0.999
GL	RUTH-LRT	0.02	1	-0.5	30	50000	45303	45846	46455	47217	47845	0.9061	0.9169	0.9291	0.9443	0.9569
GL	RUTH-LRT	0.02	1	-0.1	30	50000	45144	45795	46453	47210	47831	0.9029	0.9159	0.9291	0.9442	0.9566
GL	RUTH-LRT	0.02	1	-0.05	30	50000	8263	16595	27954	39574	45190	0.1653	0.3319	0.5591	0.7915	0.9038
GL	RUTH-LRT	0.02	1	-0.01	30	50000	4	34	233	1447	5115	0.0001	0.0007	0.0047	0.0289	0.1023
GL	RUTH-LRT	0.02	1	0	30	50000	0	4	44	507	2494	0	0.0001	0.0009	0.0101	0.0499
GL	RUTH-LRT	0.02	1	0.01	30	50000	4	25	201	1555	5383	0.0001	0.0005	0.004	0.0311	0.1077
GL	RUTH-LRT	0.02	1	0.05	30	50000	7001	14207	25123	37454	44423	0.14	0.2841	0.5025	0.7491	0.8885
GL	RUTH-LRT	0.02	1	0.1	30	50000	46794	48017	48723	49181	49417	0.9359	0.9603	0.9745	0.9836	0.9883
GL	RUTH-LRT	0.02	1	0.5	30	50000	49656	49716	49756	49788	49793	0.9931	0.9943	0.9951	0.9958	0.9959
GL	RUTH-LRT	0.02	2	-0.5	30	50000	44049	44672	45381	46250	47038	0.881	0.8934	0.9076	0.925	0.9408
GL	RUTH-LRT	0.02	2	-0.1	30	50000	43853	44623	45372	46235	47030	0.8771	0.8925	0.9074	0.9247	0.9406
GL	RUTH-LRT	0.02	2	-0.05	30	50000	7427	15109	26247	38050	44068	0.1485	0.3022	0.5249	0.761	0.8814
GL	RUTH-LRT	0.02	2	-0.01	30	50000	2	24	199	1303	4961	0	0.0005	0.004	0.0261	0.0992
GL	RUTH-LRT	0.02	2	0	30	50000	0	4	48	488	2403	0	0.0001	0.001	0.0098	0.0481
GL	RUTH-LRT	0.02	2	0.01	30	50000	6	46	217	1446	5206	0.0001	0.0009	0.0043	0.0289	0.1041
GL	RUTH-LRT	0.02	2	0.05	30	50000	7039	14299	24966	37248	44049	0.1408	0.286	0.4993	0.745	0.881
GL	RUTH-LRT	0.02	2	0.1	30	50000	46486	47794	48647	49155	49410	0.9297	0.9559	0.9729	0.9831	0.9882
GL	RUTH-LRT	0.02	2	0.5	30	50000	49699	49746	49790	49828	49832	0.994	0.9949	0.9958	0.9966	0.9966
GL	RUTH-LRT	0.02	5	-0.5	30	50000	42793	43452	44239	45208	46090	0.8559	0.869	0.8848	0.9042	0.9218
GL	RUTH-LRT	0.02	5	-0.1	30	50000	42448	43343	44196	45188	46076	0.849	0.8669	0.8839	0.9038	0.9215
GL	RUTH-LRT	0.02	5	-0.05	30	50000	7296	14779	25606	37217	43191	0.1459	0.2956	0.5121	0.7443	0.8638
GL	RUTH-LRT	0.02	5	-0.01	30	50000	3	29	189	1349	4888	0.0001	0.0006	0.0038	0.027	0.0978
GL	RUTH-LRT	0.02	5	0	30	50000	0	9	61	485	2337	0	0.0002	0.0012	0.0097	0.0467
GL	RUTH-LRT	0.02	5	0.01	30	50000	5	33	231	1428	5124	0.0001	0.0007	0.0046	0.0286	0.1025
GL	RUTH-LRT	0.02	5	0.05	30	50000	6833	14092	24764	36842	43945	0.1367	0.2818	0.4953	0.7368	0.8789
GL	RUTH-LRT	0.02	5	0.1	30	50000	46194	47638	48556	49134	49418	0.9239	0.9528	0.9711	0.9827	0.9884
GL	RUTH-LRT	0.02	5	0.5	30	50000	49767	49809	49845	49871	49879	0.9953	0.9962	0.9969	0.9974	0.9976
GL	RUTH-LRT	0.02	10	-0.5	30	50000	41911	42613	43402	44500	45445	0.8382	0.8523	0.868	0.89	0.9089
GL	RUTH-LRT	0.02	10	-0.1	30	50000	41573	42461	43344	44475	45449	0.8315	0.8492	0.8669	0.8895	0.909
GL	RUTH-LRT	0.02	10	-0.05	30	50000	7350	14662	25289	36581	42636	0.147	0.2932	0.5058	0.7316	0.8527
GL	RUTH-LRT	0.02	10	-0.01	30	50000	2	36	232	1425	5122	0	0.0007	0.0046	0.0285	0.1024
GL	RUTH-LRT	0.02	10	0	30	50000	0	3	34	460	2396	0	0.0001	0.0007	0.0092	0.0479
GL	RUTH-LRT	0.02	10	0.01	30	50000	2	33	221	1343	4827	0	0.0007	0.0044	0.0269	0.0965
GL	RUTH-LRT	0.02	10	0.05	30	50000	6559	13325	23778	36173	43463	0.1312	0.2665	0.4756	0.7235	0.8693
GL	RUTH-LRT	0.02	10	0.1	30	50000	46031	47447	48381	49004	49338	0.9206	0.9489	0.9676	0.9801	0.9868
GL	RUTH-LRT	0.02	10	0.5	30	50000	49802	49822	49869	49903	49915	0.996	0.9964	0.9974	0.9981	0.9983
GL	RUTH-LRT	0.03	1	-0.5	30	50000	45291	45841	46452	47194	47842	0.9058	0.9168	0.929	0.9439	0.9568
GL	RUTH-LRT	0.03	1	-0.1	30	50000	45129	45793	46430	47182	47813	0.9026	0.9159	0.9286	0.9436	0.9563
GL	RUTH-LRT	0.03	1	-0.05	30	50000	8185	16539	27992	39515	45178	0.1637	0.3308	0.5598	0.7903	0.9036
GL	RUTH-LRT	0.03	1	-0.01	30	50000	3	32	232	1451	5034	0.0001	0.0006	0.0046	0.029	0.1007
GL	RUTH-LRT	0.03	1	0	30	50000	0	5	57	498	2420	0	0.0001	0.0011	0.01	0.0484
GL	RUTH-LRT	0.03	1	0.01	30	50000	4	35	243	1525	5247	0.0001	0.0007	0.0049	0.0305	0.1049
GL	RUTH-LRT	0.03	1	0.05	30	50000	7129	14487	25251	37572	44449	0.1426	0.2897	0.505	0.7514	0.889
GL	RUTH-LRT	0.03	1	0.1	30	50000	46826	47997	48738	49160	49365	0.9365	0.9599	0.9748	0.9832	0.9873
GL	RUTH-LRT	0.03	1	0.5	30	50000	49606	49655	49708	49743	49751	0.9921	0.9931	0.9942	0.9949	0.995
GL	RUTH-LRT	0.03	2	-0.5	30	50000	43855	44446	45184	46091	46864	0.8771	0.8889	0.9037	0.9218	0.9373
GL	RUTH-LRT	0.03	2	-0.1	30	50000	43596	44407	45188	46038	46803	0.8719	0.8881	0.9038	0.9208	0.9361
GL	RUTH-LRT	0.03	2	-0.05	30	50000	7450	15050	26241	38020	43918	0.149	0.301	0.5248	0.7604	0.8784
GL	RUTH-LRT	0.03	2	-0.01	30	50000	8	31	198	1318	4836	0.0002	0.0006	0.004	0.0264	0.0967
GL	RUTH-LRT	0.03	2	0	30	50000	0	6	52	489	2489	0	0.0001	0.001	0.0098	0.0498
GL	RUTH-LRT	0.03	2	0.01	30	50000	3	34	250	1525	5261	0.0001	0.0007	0.005	0.0305	0.1052
GL	RUTH-LRT	0.03	2	0.05	30	50000	6833	14000	24669	37047	44032	0.1367	0.28	0.4934	0.7409	0.8806
GL	RUTH-LRT	0.03	2	0.1	30	50000	46299	47716	48564	49115	49392	0.926	0.9543	0.9713	0.9823	0.9878
GL	RUTH-LRT	0.03	2	0.5	30	50000	49655	49736	49773	49794	49802	0.9931	0.9947	0.9955	0.9959	0.996
GL	RUTH-LRT	0.03	5	-0.5	30	50000	42206	42905	43711	44700	45651	0.8441	0.8581	0.8742	0.894	0.913
GL	RUTH-LRT	0.03	5	-0.1	30	50000	41796	42756	43650	44654	45622	0.8359	0.8551	0.873	0.8931	0.9124
GL	RUTH-LRT	0.03	5	-0.05	30	50000	6999	14256	25057	36645	42634	0.14	0.2851	0.5011	0.7329	0.8527
GL	RUTH-LRT	0.03	5	-0.01	30	50000	3	25	210	1346	4856	0.0001	0.0005	0.0042	0.0269	0.0971
GL	RUTH-LRT	0.03	5	0	30	50000	1	7	63	451	2303	0	0.0001	0.0013	0.009	0.0461
GL	RUTH-LRT	0.03	5	0.01	30	50000	6	32	218	1486	5055	0.0001	0.0006	0.0044	0.0297	0.1011
GL	RUTH-LRT	0.03	5	0.05	30	50000	6741	13946	24376	36642	43748	0.1348	0.2789	0.4875	0.7328	0.875
GL	RUTH-LRT	0.03	5	0.1	30	50000	46035	47449	48421	49085	49395	0.9207	0.949	0.9684	0.9817	0.9879
GL	RUTH-LRT	0.03	5	0.5	30	50000	49752	49789	49826	49854	49860	0.995	0.9958	0.9965	0.9971	0.9972
GL	RUTH-LRT	0.03	10	-0.5	30	50000	41247	41929	42761	43876	44870	0.8249	0.8386	0.8552	0.8775	0.8974
GL	RUTH-LRT	0.03	10	-0.1	30	50000	40721	41696	42594	43741	44782	0.8144	0.8339	0.8519	0.8748	0.8956
GL	RUTH-LRT	0.03	10	-0.05	30	50000	7143	14326	24872	35936	41899	0.1429	0.2865	0.4974	0.7187	0.838
GL	RUTH-LRT	0.03	10	-0.01	30	50000	6	33	210	1491	5033	0.0001	0.0007	0.0042	0.0298	0.1007
GL	RUTH-LRT	0.03	10	0	30	50000	4	7	52	472	2429	0.0001	0.0001	0.001	0.0094	0.0486
GL	RUTH-LRT	0.03	10	0.01	30	50000	3	31	202	1344	4761	0.0001	0.0006	0.004	0.0269	0.0952
GL	RUTH-LRT	0.03	10	0.05	30	50000	6580	13476	23659	36077	43465	0.1316	0.2695	0.4732	0.7215	0.8693
GL	RUTH-LRT	0.03	10	0.1	30	50000	45752	47256	48281	48999	49332	0.915	0.9451	0.9656	0.98	0.9866
GL	RUTH-LRT	0.03	10	0.5	30	50000	49769	49798	49847	49894	49905	0.9954	0.996	0.9969	0.9979	0.9981
GL	RUTH-LRT	0.05	1	-0.5	30	50000	45297	45815	46451	47174	47843	0.9059	0.9163	0.929	0.9435	0.9569
GL	RUTH-LRT	0.05	1	-0.1	30	50000	45129	45824	46469	47178	47827	0.9026	0.9165	0.9294	0.9436	0.9565
GL	RUTH-LRT	0.05	1	-0.05	30	50000	8175	16443	27729	39350	45101	0.1635	0.3289	0.5546	0.787	0.902
GL	RUTH-LRT	0.05	1	-0.01	30	50000	3	29	190	1381	4916	0.0001	0.0006	0.0038	0.0276	0.0983
GL	RUTH-LRT	0.05	1	0	30	50000	2	5	48	503	2444	0	0.0001	0.001	0.0101	0.0489
GL	RUTH-LRT	0.05	1	0.01	30	50000	7	30	211	1488	5272	0.0001	0.0006	0.0042	0.0298	0.1054
GL	RUTH-LRT	0.05	1	0.05	30	50000	7087	14327	25074	37405	44305	0.1417	0.2865	0.5015	0.7481	0.8861
GL	RUTH-LRT	0.05	1	0.1	30	50000	46743	47965	48704	49143	49346	0.9349	0.9593	0.9741	0.9829	0.9869
GL	RUTH-LRT	0.05	1	0.5	30	50000	49573	49635	49685	49712	49715	0.9915	0.9927	0.9937	0.9942	0.9943
GL	RUTH-LRT	0.05	2	-0.5	30	50000	43270	43892	44647	45592	46432	0.8654	0.8778	0.8929	0.9118	0.9286
GL	RUTH-LRT	0.05	2	-0.1	30	50000	42969	43795	44594	45558	46384	0.8594	0.8759	0.8919	0.9112	0.9277
GL	RUTH-LRT	0.05	2	-0.05	30	50000	7313	14967	25838	37397	43433	0.1463	0.2993	0.5168	0.7479	0.8687
GL	RUTH-LRT	0.05	2	-0.01	30	50000	5	32	191	1310	4884	0.0001	0.0006	0.0038	0.0262	0.0977
GL	RUTH-LRT	0.05	2	0	30	50000	1	8	49	481	2453	0	0.0002	0.001	0.0096	0.0491
GL	RUTH-LRT	0.05	2	0.01	30	50000	7	44	232	1459	5161	0.0001	0.0009	0.0046	0.0292	0.1032
GL	RUTH-LRT	0.05	2	0.05	30	50000	6868	13915	24520	36828	43838	0.1374	0.2783	0.4904	0.7366	0.8768
GL	RUTH-LRT	0.05	2	0.1	30	50000	46169	47575	48482	49074	49324	0.9234	0.9515	0.9696	0.9815	0.9865
GL	RUTH-LRT	0.05	2	0.5	30	50000	49596	49664	49708	49743	49757	0.9919	0.9933	0.9942	0.9949	0.9951
GL	RUTH-LRT	0.05	5	-0.5	30	50000	41149	41856	42688	43722	44736	0.823	0.8371	0.8538	0.8744	0.8947
GL	RUTH-LRT	0.05	5	-0.1	30	50000	40479	41502	42540	43663	44669	0.8096	0.83	0.8508	0.8733	0.8934
GL	RUTH-LRT	0.05	5	-0.05	30	50000	6498	13493	23965	35257	41519	0.13	0.2699	0.4793	0.7051	0.8304
GL	RUTH-LRT	0.05	5	-0.01	30	50000	3	26	168	1273	4598	0.0001	0.0005	0.0034	0.0255	0.092
GL	RUTH-LRT	0.05	5	0	30	50000	0	3	48	460	2360	0	0.0001	0.001	0.0092	0.0472
GL	RUTH-LRT	0.05	5	0.01	30	50000	6	38	216	1428	4993	0.0001	0.0008	0.0043	0.0286	0.0999
GL	RUTH-LRT	0.05	5	0.05	30	50000	6459	13124	23734	35989	43277	0.1292	0.2625	0.4747	0.7198	0.8655
GL	RUTH-LRT	0.05	5	0.1	30	50000	45536	47153	48197	48903	49285	0.9107	0.9431	0.9639	0.9781	0.9857
GL	RUTH-LRT	0.05	5	0.5	30	50000	49691	49750	49787	49820	49832	0.9938	0.995	0.9957	0.9964	0.9966
GL	RUTH-LRT	0.05	10	-0.5	30	50000	39836	40566	41428	42560	43641	0.7967	0.8113	0.8286	0.8512	0.8728
GL	RUTH-LRT	0.05	10	-0.1	30	50000	39002	40070	41217	42470	43599	0.78	0.8014	0.8243	0.8494	0.872
GL	RUTH-LRT	0.05	10	-0.05	30	50000	6610	13327	23477	34527	40470	0.1322	0.2665	0.4695	0.6905	0.8094
GL	RUTH-LRT	0.05	10	-0.01	30	50000	3	29	216	1293	4831	0.0001	0.0006	0.0043	0.0259	0.0966
GL	RUTH-LRT	0.05	10	0	30	50000	1	7	53	458	2306	0	0.0001	0.0011	0.0092	0.0461
GL	RUTH-LRT	0.05	10	0.01	30	50000	4	26	233	1337	4707	0.0001	0.0005	0.0047	0.0267	0.0941
GL	RUTH-LRT	0.05	10	0.05	30	50000	6266	12926	23178	35385	42794	0.1253	0.2585	0.4636	0.7077	0.8559
GL	RUTH-LRT	0.05	10	0.1	30	50000	45235	46889	48024	48821	49240	0.9047	0.9378	0.9605	0.9764	0.9848
GL	RUTH-LRT	0.05	10	0.5	30	50000	49733	49761	49805	49848	49863	0.9947	0.9952	0.9961	0.997	0.9973
GL	RUTH-LRT	0.1	1	-0.5	30	50000	45296	45851	46445	47156	47834	0.9059	0.917	0.9289	0.9431	0.9567
GL	RUTH-LRT	0.1	1	-0.1	30	50000	45099	45794	46447	47176	47822	0.902	0.9159	0.9289	0.9435	0.9564
GL	RUTH-LRT	0.1	1	-0.05	30	50000	8118	16275	27774	39426	45163	0.1624	0.3255	0.5555	0.7885	0.9033
GL	RUTH-LRT	0.1	1	-0.01	30	50000	8	28	194	1324	4964	0.0002	0.0006	0.0039	0.0265	0.0993
GL	RUTH-LRT	0.1	1	0	30	50000	1	3	51	491	2464	0	0.0001	0.001	0.0098	0.0493
GL	RUTH-LRT	0.1	1	0.01	30	50000	4	38	245	1520	5175	0.0001	0.0008	0.0049	0.0304	0.1035
GL	RUTH-LRT	0.1	1	0.05	30	50000	7123	14340	25197	37393	44310	0.1425	0.2868	0.5039	0.7479	0.8862
GL	RUTH-LRT	0.1	1	0.1	30	50000	46689	47967	48659	49089	49307	0.9338	0.9593	0.9732	0.9818	0.9861
GL	RUTH-LRT	0.1	1	0.5	30	50000	49501	49556	49613	49637	49648	0.99	0.9911	0.9923	0.9927	0.993
GL	RUTH-LRT	0.1	2	-0.5	30	50000	42295	42929	43734	44676	45547	0.8459	0.8586	0.8747	0.8935	0.9109
GL	RUTH-LRT	0.1	2	-0.1	30	50000	41782	42729	43633	44583	45532	0.8356	0.8546	0.8727	0.8917	0.9106
GL	RUTH-LRT	0.1	2	-0.05	30	50000	6918	14080	24827	36261	42433	0.1384	0.2816	0.4965	0.7252	0.8487
GL	RUTH-LRT	0.1	2	-0.01	30	50000	7	24	170	1288	4769	0.0001	0.0005	0.0034	0.0258	0.0954
GL	RUTH-LRT	0.1	2	0	30	50000	0	3	49	465	2411	0	0.0001	0.001	0.0093	0.0482
GL	RUTH-LRT	0.1	2	0.01	30	50000	3	36	246	1479	5124	0.0001	0.0007	0.0049	0.0296	0.1025
GL	RUTH-LRT	0.1	2	0.05	30	50000	6769	13733	24028	36169	43337	0.1354	0.2747	0.4806	0.7234	0.8667
GL	RUTH-LRT	0.1	2	0.1	30	50000	45641	47265	48298	48953	49238	0.9128	0.9453	0.966	0.9791	0.9848
GL	RUTH-LRT	0.1	2	0.5	30	50000	49535	49592	49637	49672	49677	0.9907	0.9918	0.9927	0.9934	0.9935
GL	RUTH-LRT	0.1	5	-0.5	30	50000	38852	39623	40508	41679	42821	0.777	0.7925	0.8102	0.8336	0.8564
GL	RUTH-LRT	0.1	5	-0.1	30	50000	37681	38947	40157	41523	42734	0.7536	0.7789	0.8031	0.8305	0.8547
GL	RUTH-LRT	0.1	5	-0.05	30	50000	6034	12384	22143	32960	39260	0.1207	0.2477	0.4429	0.6592	0.7852
GL	RUTH-LRT	0.1	5	-0.01	30	50000	4	22	168	1209	4642	0.0001	0.0004	0.0034	0.0242	0.0928
GL	RUTH-LRT	0.1	5	0	30	50000	0	4	55	501	2422	0	0.0001	0.0011	0.01	0.0484
GL	RUTH-LRT	0.1	5	0.01	30	50000	2	32	244	1392	4904	0	0.0006	0.0049	0.0278	0.0981
GL	RUTH-LRT	0.1	5	0.05	30	50000	6331	12937	23103	35160	42563	0.1266	0.2587	0.4621	0.7032	0.8513
GL	RUTH-LRT	0.1	5	0.1	30	50000	44680	46443	47726	48694	49124	0.8936	0.9289	0.9545	0.9739	0.9825
GL	RUTH-LRT	0.1	5	0.5	30	50000	49610	49674	49711	49746	49760	0.9922	0.9935	0.9942	0.9949	0.9952
GL	RUTH-LRT	0.1	10	-0.5	30	50000	36934	37756	38708	39915	41135	0.7387	0.7551	0.7742	0.7983	0.8227
GL	RUTH-LRT	0.1	10	-0.1	30	50000	35419	36777	38091	39617	41079	0.7084	0.7355	0.7618	0.7923	0.8216
GL	RUTH-LRT	0.1	10	-0.05	30	50000	5716	11788	20921	31482	37539	0.1143	0.2358	0.4184	0.6296	0.7508
GL	RUTH-LRT	0.1	10	-0.01	30	50000	1	29	192	1271	4617	0	0.0006	0.0038	0.0254	0.0923
GL	RUTH-LRT	0.1	10	0	30	50000	0	7	56	490	2263	0	0.0001	0.0011	0.0098	0.0453
GL	RUTH-LRT	0.1	10	0.01	30	50000	5	29	183	1310	4668	0.0001	0.0006	0.0037	0.0262	0.0934
GL	RUTH-LRT	0.1	10	0.05	30	50000	5935	12119	22224	34364	41984	0.1187	0.2424	0.4445	0.6873	0.8397
GL	RUTH-LRT	0.1	10	0.1	30	50000	44162	46052	47456	48442	49015	0.8832	0.921	0.9491	0.9688	0.9803
GL	RUTH-LRT	0.1	10	0.5	30	50000	49653	49684	49738	49784	49800	0.9931	0.9937	0.9948	0.9957	0.996
GL	RUTH-LRT	Combined	1	-0.5	30	250000	226493	229207	232276	235925	239220	0.906	0.9168	0.9291	0.9437	0.9569
GL	RUTH-LRT	Combined	1	-0.1	30	250000	225679	229012	232249	235942	239135	0.9027	0.916	0.929	0.9438	0.9565
GL	RUTH-LRT	Combined	1	-0.05	30	250000	41021	82507	139332	197391	225883	0.1641	0.33	0.5573	0.7896	0.9035
GL	RUTH-LRT	Combined	1	-0.01	30	250000	20	148	1077	6987	25012	0.0001	0.0006	0.0043	0.0279	0.1
GL	RUTH-LRT	Combined	1	0	30	250000	3	22	246	2471	12272	0	0.0001	0.001	0.0099	0.0491
GL	RUTH-LRT	Combined	1	0.01	30	250000	22	159	1149	7586	26310	0.0001	0.0006	0.0046	0.0303	0.1052
GL	RUTH-LRT	Combined	1	0.05	30	250000	35534	71701	125954	187433	222010	0.1421	0.2868	0.5038	0.7497	0.888
GL	RUTH-LRT	Combined	1	0.1	30	250000	233923	240079	243664	245888	246949	0.9357	0.9603	0.9747	0.9836	0.9878
GL	RUTH-LRT	Combined	1	0.5	30	250000	248076	248340	248573	248712	248744	0.9923	0.9934	0.9943	0.9948	0.995
GT	RUTH-LRT	0.01	1	-0.5	5	50000	43453	44312	45306	46152	47065	0.8691	0.8862	0.9061	0.923	0.9413
GT	RUTH-LRT	0.01	1	-0.1	5	50000	15418	19090	24660	32603	39392	0.3084	0.3818	0.4932	0.6521	0.7878
GT	RUTH-LRT	0.01	1	-0.05	5	50000	3401	6262	10413	14957	19208	0.068	0.1252	0.2083	0.2991	0.3842
GT	RUTH-LRT	0.01	1	-0.01	5	50000	508	1551	4592	12058	21968	0.0102	0.031	0.0918	0.2412	0.4394
GT	RUTH-LRT	0.01	1	0	5	50000	1053	2814	6868	15300	24456	0.0211	0.0563	0.1374	0.306	0.4891
GT	RUTH-LRT	0.01	1	0.01	5	50000	2575	5734	11188	19447	26733	0.0515	0.1147	0.2238	0.3889	0.5347
GT	RUTH-LRT	0.01	1	0.05	5	50000	19702	24046	27274	29737	32085	0.394	0.4809	0.5455	0.5947	0.6417
GT	RUTH-LRT	0.01	1	0.1	5	50000	30744	32448	34976	38488	41531	0.6149	0.649	0.6995	0.7698	0.8306
GT	RUTH-LRT	0.01	1	0.5	5	50000	48530	48700	48878	49036	49136	0.9706	0.974	0.9776	0.9807	0.9827
GT	RUTH-LRT	0.01	2	-0.5	5	50000	42773	43711	44761	45834	46836	0.8555	0.8742	0.8952	0.9167	0.9367
GT	RUTH-LRT	0.01	2	-0.1	5	50000	14700	18296	23819	32019	39031	0.294	0.3659	0.4764	0.6404	0.7806
GT	RUTH-LRT	0.01	2	-0.05	5	50000	3262	5901	9911	14680	19032	0.0652	0.118	0.1982	0.2936	0.3806
GT	RUTH-LRT	0.01	2	-0.01	5	50000	492	1614	4669	12326	22143	0.0098	0.0323	0.0934	0.2465	0.4429
GT	RUTH-LRT	0.01	2	0	5	50000	1156	3032	7325	15691	24639	0.0231	0.0606	0.1465	0.3138	0.4928
GT	RUTH-LRT	0.01	2	0.01	5	50000	2701	5825	11251	19579	26855	0.054	0.1165	0.225	0.3916	0.5371
GT	RUTH-LRT	0.01	2	0.05	5	50000	19991	24190	27283	29747	32102	0.3998	0.4838	0.5457	0.5949	0.642
GT	RUTH-LRT	0.01	2	0.1	5	50000	30717	32410	34960	38450	41449	0.6143	0.6482	0.6992	0.769	0.829
GT	RUTH-LRT	0.01	2	0.5	5	50000	48471	48680	48888	49070	49209	0.9694	0.9736	0.9778	0.9814	0.9842
GT	RUTH-LRT	0.01	5	-0.5	5	50000	42020	43070	44228	45455	46573	0.8404	0.8614	0.8846	0.9091	0.9315
GT	RUTH-LRT	0.01	5	-0.1	5	50000	13977	17730	23589	32159	39356	0.2795	0.3546	0.4718	0.6432	0.7871
GT	RUTH-LRT	0.01	5	-0.05	5	50000	3127	5742	9580	14279	18598	0.0625	0.1148	0.1916	0.2856	0.372
GT	RUTH-LRT	0.01	5	-0.01	5	50000	440	1418	4255	11623	21393	0.0088	0.0284	0.0851	0.2325	0.4279
GT	RUTH-LRT	0.01	5	0	5	50000	967	2543	6519	14774	24063	0.0193	0.0509	0.1304	0.2955	0.4813
GT	RUTH-LRT	0.01	5	0.01	5	50000	2402	5293	10741	19036	26530	0.048	0.1059	0.2148	0.3807	0.5306
GT	RUTH-LRT	0.01	5	0.05	5	50000	19253	23715	26984	29628	31943	0.3851	0.4743	0.5397	0.5926	0.6389
GT	RUTH-LRT	0.01	5	0.1	5	50000	30577	32319	34804	38301	41254	0.6115	0.6464	0.6961	0.766	0.8251
GT	RUTH-LRT	0.01	5	0.5	5	50000	48502	48690	48894	49103	49234	0.97	0.9738	0.9779	0.9821	0.9847
GT	RUTH-LRT	0.01	10	-0.5	5	50000	41412	42505	43758	45086	46361	0.8282	0.8501	0.8752	0.9017	0.9272
GT	RUTH-LRT	0.01	10	-0.1	5	50000	13534	17530	23786	32681	39818	0.2707	0.3506	0.4757	0.6536	0.7964
GT	RUTH-LRT	0.01	10	-0.05	5	50000	3121	5653	9426	14030	18368	0.0624	0.1131	0.1885	0.2806	0.3674
GT	RUTH-LRT	0.01	10	-0.01	5	50000	444	1256	3793	10749	20234	0.0089	0.0251	0.0759	0.215	0.4047
GT	RUTH-LRT	0.01	10	0	5	50000	720	2115	5694	13604	22944	0.0144	0.0423	0.1139	0.2721	0.4589
GT	RUTH-LRT	0.01	10	0.01	5	50000	1871	4501	9547	18026	25883	0.0374	0.09	0.1909	0.3605	0.5177
GT	RUTH-LRT	0.01	10	0.05	5	50000	18261	22920	26622	29341	31781	0.3652	0.4584	0.5324	0.5868	0.6356
GT	RUTH-LRT	0.01	10	0.1	5	50000	30379	32126	34493	37866	40910	0.6076	0.6425	0.6899	0.7573	0.8182
GT	RUTH-LRT	0.01	10	0.5	5	50000	48452	48671	48889	49104	49243	0.969	0.9734	0.9778	0.9821	0.9849
GT	RUTH-LRT	0.02	1	-0.5	5	50000	43446	44317	45300	46157	47073	0.8689	0.8863	0.906	0.9231	0.9415
GT	RUTH-LRT	0.02	1	-0.1	5	50000	15303	18943	24460	32423	39249	0.3061	0.3789	0.4892	0.6485	0.785
GT	RUTH-LRT	0.02	1	-0.05	5	50000	3421	6301	10428	15122	19418	0.0684	0.126	0.2086	0.3024	0.3884
GT	RUTH-LRT	0.02	1	-0.01	5	50000	486	1515	4555	12211	22155	0.0097	0.0303	0.0911	0.2442	0.4431
GT	RUTH-LRT	0.02	1	0	5	50000	1044	2920	7046	15419	24715	0.0209	0.0584	0.1409	0.3084	0.4943
GT	RUTH-LRT	0.02	1	0.01	5	50000	2777	5975	11440	19634	26983	0.0555	0.1195	0.2288	0.3927	0.5397
GT	RUTH-LRT	0.02	1	0.05	5	50000	19953	24078	27287	29753	32006	0.3991	0.4816	0.5457	0.5951	0.6401
GT	RUTH-LRT	0.02	1	0.1	5	50000	30705	32507	35086	38579	41652	0.6141	0.6501	0.7017	0.7716	0.833
GT	RUTH-LRT	0.02	1	0.5	5	50000	48516	48670	48845	48987	49103	0.9703	0.9734	0.9769	0.9797	0.9821
GT	RUTH-LRT	0.02	2	-0.5	5	50000	42492	43471	44558	45712	46787	0.8498	0.8694	0.8912	0.9142	0.9357
GT	RUTH-LRT	0.02	2	-0.1	5	50000	14230	17864	23479	31737	38905	0.2846	0.3573	0.4696	0.6347	0.7781
GT	RUTH-LRT	0.02	2	-0.05	5	50000	3226	5814	9728	14373	18790	0.0645	0.1163	0.1946	0.2875	0.3758
GT	RUTH-LRT	0.02	2	-0.01	5	50000	519	1516	4411	11857	21691	0.0104	0.0303	0.0882	0.2371	0.4338
GT	RUTH-LRT	0.02	2	0	5	50000	994	2719	6943	15124	24325	0.0199	0.0544	0.1389	0.3025	0.4865
GT	RUTH-LRT	0.02	2	0.01	5	50000	2345	5423	10945	19169	26714	0.0469	0.1085	0.2189	0.3834	0.5343
GT	RUTH-LRT	0.02	2	0.05	5	50000	19309	23728	27094	29526	31743	0.3862	0.4746	0.5419	0.5905	0.6349
GT	RUTH-LRT	0.02	2	0.1	5	50000	30470	32087	34497	37909	40881	0.6094	0.6417	0.6899	0.7582	0.8176
GT	RUTH-LRT	0.02	2	0.5	5	50000	48458	48646	48841	49053	49189	0.9692	0.9729	0.9768	0.9811	0.9838
GT	RUTH-LRT	0.02	5	-0.5	5	50000	41117	42240	43546	45004	46260	0.8223	0.8448	0.8709	0.9001	0.9252
GT	RUTH-LRT	0.02	5	-0.1	5	50000	12926	16691	22409	31093	38463	0.2585	0.3338	0.4482	0.6219	0.7693
GT	RUTH-LRT	0.02	5	-0.05	5	50000	3088	5519	9295	13806	18242	0.0618	0.1104	0.1859	0.2761	0.3648
GT	RUTH-LRT	0.02	5	-0.01	5	50000	463	1511	4490	11913	21686	0.0093	0.0302	0.0898	0.2383	0.4337
GT	RUTH-LRT	0.02	5	0	5	50000	958	2849	7001	15212	24325	0.0192	0.057	0.14	0.3042	0.4865
GT	RUTH-LRT	0.02	5	0.01	5	50000	2474	5554	10928	19376	26846	0.0495	0.1111	0.2186	0.3875	0.5369
GT	RUTH-LRT	0.02	5	0.05	5	50000	19239	23546	27015	29470	31786	0.3848	0.4709	0.5403	0.5894	0.6357
GT	RUTH-LRT	0.02	5	0.1	5	50000	30368	32068	34531	37825	40774	0.6074	0.6414	0.6906	0.7565	0.8155
GT	RUTH-LRT	0.02	5	0.5	5	50000	48384	48584	48800	49057	49208	0.9677	0.9717	0.976	0.9811	0.9842
GT	RUTH-LRT	0.02	10	-0.5	5	50000	40162	41436	42877	44509	45953	0.8032	0.8287	0.8575	0.8902	0.9191
GT	RUTH-LRT	0.02	10	-0.1	5	50000	12131	15961	21993	30928	38487	0.2426	0.3192	0.4399	0.6186	0.7697
GT	RUTH-LRT	0.02	10	-0.05	5	50000	2979	5380	9012	13600	17934	0.0596	0.1076	0.1802	0.272	0.3587
GT	RUTH-LRT	0.02	10	-0.01	5	50000	447	1429	4297	11649	21470	0.0089	0.0286	0.0859	0.233	0.4294
GT	RUTH-LRT	0.02	10	0	5	50000	860	2518	6452	14591	23907	0.0172	0.0504	0.129	0.2918	0.4781
GT	RUTH-LRT	0.02	10	0.01	5	50000	2212	5096	10454	18831	26590	0.0442	0.1019	0.2091	0.3766	0.5318
GT	RUTH-LRT	0.02	10	0.05	5	50000	18952	23398	26872	29397	31595	0.379	0.468	0.5374	0.5879	0.6319
GT	RUTH-LRT	0.02	10	0.1	5	50000	30162	31698	34061	37302	40266	0.6032	0.634	0.6812	0.746	0.8053
GT	RUTH-LRT	0.02	10	0.5	5	50000	48336	48547	48796	49041	49205	0.9667	0.9709	0.9759	0.9808	0.9841
GT	RUTH-LRT	0.03	1	-0.5	5	50000	43444	44318	45318	46168	47095	0.8689	0.8864	0.9064	0.9234	0.9419
GT	RUTH-LRT	0.03	1	-0.1	5	50000	15527	19135	24605	32632	39490	0.3105	0.3827	0.4921	0.6526	0.7898
GT	RUTH-LRT	0.03	1	-0.05	5	50000	3287	6280	10403	15022	19295	0.0657	0.1256	0.2081	0.3004	0.3859
GT	RUTH-LRT	0.03	1	-0.01	5	50000	482	1570	4671	12226	21951	0.0096	0.0314	0.0934	0.2445	0.439
GT	RUTH-LRT	0.03	1	0	5	50000	1053	2818	6944	15227	24450	0.0211	0.0564	0.1389	0.3045	0.489
GT	RUTH-LRT	0.03	1	0.01	5	50000	2722	5771	11251	19540	26753	0.0544	0.1154	0.225	0.3908	0.5351
GT	RUTH-LRT	0.03	1	0.05	5	50000	19925	24144	27343	29847	32183	0.3985	0.4829	0.5469	0.5969	0.6437
GT	RUTH-LRT	0.03	1	0.1	5	50000	30819	32628	35269	38804	41814	0.6164	0.6526	0.7054	0.7761	0.8363
GT	RUTH-LRT	0.03	1	0.5	5	50000	48521	48678	48829	48996	49101	0.9704	0.9736	0.9766	0.9799	0.982
GT	RUTH-LRT	0.03	2	-0.5	5	50000	42176	43175	44329	45547	46652	0.8435	0.8635	0.8866	0.9109	0.933
GT	RUTH-LRT	0.03	2	-0.1	5	50000	13617	17189	22418	30630	37829	0.2723	0.3438	0.4484	0.6126	0.7566
GT	RUTH-LRT	0.03	2	-0.05	5	50000	3329	5972	9782	14486	18878	0.0666	0.1194	0.1956	0.2897	0.3776
GT	RUTH-LRT	0.03	2	-0.01	5	50000	600	1771	5010	12769	22768	0.012	0.0354	0.1002	0.2554	0.4554
GT	RUTH-LRT	0.03	2	0	5	50000	1247	3202	7656	16139	25141	0.0249	0.064	0.1531	0.3228	0.5028
GT	RUTH-LRT	0.03	2	0.01	5	50000	2735	5975	11530	20065	27351	0.0547	0.1195	0.2306	0.4013	0.547
GT	RUTH-LRT	0.03	2	0.05	5	50000	19787	23990	27118	29532	31640	0.3957	0.4798	0.5424	0.5906	0.6328
GT	RUTH-LRT	0.03	2	0.1	5	50000	30172	31700	34069	37348	40354	0.6034	0.634	0.6814	0.747	0.8071
GT	RUTH-LRT	0.03	2	0.5	5	50000	48395	48622	48814	49023	49149	0.9679	0.9724	0.9763	0.9805	0.983
GT	RUTH-LRT	0.03	5	-0.5	5	50000	40225	41527	42879	44522	45951	0.8045	0.8305	0.8576	0.8904	0.919
GT	RUTH-LRT	0.03	5	-0.1	5	50000	12323	16280	22458	31581	38966	0.2465	0.3256	0.4492	0.6316	0.7793
GT	RUTH-LRT	0.03	5	-0.05	5	50000	2757	5140	8794	13496	17916	0.0551	0.1028	0.1759	0.2699	0.3583
GT	RUTH-LRT	0.03	5	-0.01	5	50000	466	1335	3870	10836	20517	0.0093	0.0267	0.0774	0.2167	0.4103
GT	RUTH-LRT	0.03	5	0	5	50000	798	2261	5855	13905	23258	0.016	0.0452	0.1171	0.2781	0.4652
GT	RUTH-LRT	0.03	5	0.01	5	50000	1851	4492	9548	18043	26061	0.037	0.0898	0.191	0.3609	0.5212
GT	RUTH-LRT	0.03	5	0.05	5	50000	18172	22928	26661	29370	31703	0.3634	0.4586	0.5332	0.5874	0.6341
GT	RUTH-LRT	0.03	5	0.1	5	50000	30258	31824	34137	37456	40440	0.6052	0.6365	0.6827	0.7491	0.8088
GT	RUTH-LRT	0.03	5	0.5	5	50000	48345	48572	48804	49038	49186	0.9669	0.9714	0.9761	0.9808	0.9837
GT	RUTH-LRT	0.03	10	-0.5	5	50000	38882	40222	41807	43729	45378	0.7776	0.8044	0.8361	0.8746	0.9076
GT	RUTH-LRT	0.03	10	-0.1	5	50000	11220	14936	20719	29529	37333	0.2244	0.2987	0.4144	0.5906	0.7467
GT	RUTH-LRT	0.03	10	-0.05	5	50000	2807	5069	8549	13184	17668	0.0561	0.1014	0.171	0.2637	0.3534
GT	RUTH-LRT	0.03	10	-0.01	5	50000	525	1614	4765	12262	21961	0.0105	0.0323	0.0953	0.2452	0.4392
GT	RUTH-LRT	0.03	10	0	5	50000	1025	2792	6839	15157	24516	0.0205	0.0558	0.1368	0.3031	0.4903
GT	RUTH-LRT	0.03	10	0.01	5	50000	2475	5551	11016	19318	26889	0.0495	0.111	0.2203	0.3864	0.5378
GT	RUTH-LRT	0.03	10	0.05	5	50000	19140	23385	26823	29288	31519	0.3828	0.4677	0.5365	0.5858	0.6304
GT	RUTH-LRT	0.03	10	0.1	5	50000	30094	31591	33823	37030	39987	0.6019	0.6318	0.6765	0.7406	0.7997
GT	RUTH-LRT	0.03	10	0.5	5	50000	48195	48455	48718	48984	49183	0.9639	0.9691	0.9744	0.9797	0.9837
GT	RUTH-LRT	0.05	1	-0.5	5	50000	43444	44352	45315	46182	47079	0.8689	0.887	0.9063	0.9236	0.9416
GT	RUTH-LRT	0.05	1	-0.1	5	50000	15278	18887	24283	32313	39351	0.3056	0.3777	0.4857	0.6463	0.787
GT	RUTH-LRT	0.05	1	-0.05	5	50000	3371	6243	10405	14953	19236	0.0674	0.1249	0.2081	0.2991	0.3847
GT	RUTH-LRT	0.05	1	-0.01	5	50000	491	1527	4624	12268	22152	0.0098	0.0305	0.0925	0.2454	0.443
GT	RUTH-LRT	0.05	1	0	5	50000	1035	2855	6953	15447	24666	0.0207	0.0571	0.1391	0.3089	0.4933
GT	RUTH-LRT	0.05	1	0.01	5	50000	2580	5703	11203	19508	26916	0.0516	0.1141	0.2241	0.3902	0.5383
GT	RUTH-LRT	0.05	1	0.05	5	50000	19758	24047	27247	29739	32000	0.3952	0.4809	0.5449	0.5948	0.64
GT	RUTH-LRT	0.05	1	0.1	5	50000	30813	32541	35083	38456	41458	0.6163	0.6508	0.7017	0.7691	0.8292
GT	RUTH-LRT	0.05	1	0.5	5	50000	48522	48677	48842	49001	49081	0.9704	0.9735	0.9768	0.98	0.9816
GT	RUTH-LRT	0.05	2	-0.5	5	50000	41545	42571	43822	45168	46350	0.8309	0.8514	0.8764	0.9034	0.927
GT	RUTH-LRT	0.05	2	-0.1	5	50000	13160	16794	22436	30897	38242	0.2632	0.3359	0.4487	0.6179	0.7648
GT	RUTH-LRT	0.05	2	-0.05	5	50000	3060	5513	9191	13920	18307	0.0612	0.1103	0.1838	0.2784	0.3661
GT	RUTH-LRT	0.05	2	-0.01	5	50000	505	1624	4581	12204	21916	0.0101	0.0325	0.0916	0.2441	0.4383
GT	RUTH-LRT	0.05	2	0	5	50000	1032	2763	6940	15332	24588	0.0206	0.0553	0.1388	0.3066	0.4918
GT	RUTH-LRT	0.05	2	0.01	5	50000	2308	5282	10788	19274	26988	0.0462	0.1056	0.2158	0.3855	0.5398
GT	RUTH-LRT	0.05	2	0.05	5	50000	18967	23435	26858	29401	31621	0.3793	0.4687	0.5372	0.588	0.6324
GT	RUTH-LRT	0.05	2	0.1	5	50000	30121	31662	34040	37287	40316	0.6024	0.6332	0.6808	0.7457	0.8063
GT	RUTH-LRT	0.05	2	0.5	5	50000	48429	48637	48814	49012	49129	0.9686	0.9727	0.9763	0.9802	0.9826
GT	RUTH-LRT	0.05	5	-0.5	5	50000	38720	40007	41497	43419	45151	0.7744	0.8001	0.8299	0.8684	0.903
GT	RUTH-LRT	0.05	5	-0.1	5	50000	10950	15031	21267	30410	38235	0.219	0.3006	0.4253	0.6082	0.7647
GT	RUTH-LRT	0.05	5	-0.05	5	50000	2664	4839	8302	12801	17302	0.0533	0.0968	0.166	0.256	0.346
GT	RUTH-LRT	0.05	5	-0.01	5	50000	455	1290	3906	10744	20321	0.0091	0.0258	0.0781	0.2149	0.4064
GT	RUTH-LRT	0.05	5	0	5	50000	803	2227	5907	13863	23416	0.0161	0.0445	0.1181	0.2773	0.4683
GT	RUTH-LRT	0.05	5	0.01	5	50000	1871	4663	9865	18505	26495	0.0374	0.0933	0.1973	0.3701	0.5299
GT	RUTH-LRT	0.05	5	0.05	5	50000	17952	22771	26523	29346	31697	0.359	0.4554	0.5305	0.5869	0.6339
GT	RUTH-LRT	0.05	5	0.1	5	50000	30009	31417	33656	36938	39820	0.6002	0.6283	0.6731	0.7388	0.7964
GT	RUTH-LRT	0.05	5	0.5	5	50000	48259	48516	48773	49005	49167	0.9652	0.9703	0.9755	0.9801	0.9833
GT	RUTH-LRT	0.05	10	-0.5	5	50000	36725	38126	39823	42117	44186	0.7345	0.7625	0.7965	0.8423	0.8837
GT	RUTH-LRT	0.05	10	-0.1	5	50000	9875	13622	19424	28519	36450	0.1975	0.2724	0.3885	0.5704	0.729
GT	RUTH-LRT	0.05	10	-0.05	5	50000	2456	4519	7741	12297	16975	0.0491	0.0904	0.1548	0.2459	0.3395
GT	RUTH-LRT	0.05	10	-0.01	5	50000	490	1532	4569	12160	21736	0.0098	0.0306	0.0914	0.2432	0.4347
GT	RUTH-LRT	0.05	10	0	5	50000	1034	2759	6926	15245	24381	0.0207	0.0552	0.1385	0.3049	0.4876
GT	RUTH-LRT	0.05	10	0.01	5	50000	2491	5555	11121	19389	26894	0.0498	0.1111	0.2224	0.3878	0.5379
GT	RUTH-LRT	0.05	10	0.05	5	50000	19084	23465	26728	29196	31398	0.3817	0.4693	0.5346	0.5839	0.628
GT	RUTH-LRT	0.05	10	0.1	5	50000	30007	31458	33675	36774	39753	0.6001	0.6292	0.6735	0.7355	0.7951
GT	RUTH-LRT	0.05	10	0.5	5	50000	48157	48419	48685	48922	49125	0.9631	0.9684	0.9737	0.9784	0.9825
GT	RUTH-LRT	0.1	1	-0.5	5	50000	43464	44299	45291	46185	47099	0.8693	0.886	0.9058	0.9237	0.942
GT	RUTH-LRT	0.1	1	-0.1	5	50000	15382	19007	24651	32588	39454	0.3076	0.3801	0.493	0.6518	0.7891
GT	RUTH-LRT	0.1	1	-0.05	5	50000	3381	6322	10411	15010	19187	0.0676	0.1264	0.2082	0.3002	0.3837
GT	RUTH-LRT	0.1	1	-0.01	5	50000	506	1562	4532	11984	21796	0.0101	0.0312	0.0906	0.2397	0.4359
GT	RUTH-LRT	0.1	1	0	5	50000	970	2648	6745	15144	24331	0.0194	0.053	0.1349	0.3029	0.4866
GT	RUTH-LRT	0.1	1	0.01	5	50000	2506	5483	11017	19400	26881	0.0501	0.1097	0.2203	0.388	0.5376
GT	RUTH-LRT	0.1	1	0.05	5	50000	19641	23791	27093	29685	32102	0.3928	0.4758	0.5419	0.5937	0.642
GT	RUTH-LRT	0.1	1	0.1	5	50000	30649	32386	34895	38369	41425	0.613	0.6477	0.6979	0.7674	0.8285
GT	RUTH-LRT	0.1	1	0.5	5	50000	48524	48687	48849	48986	49079	0.9705	0.9737	0.977	0.9797	0.9816
GT	RUTH-LRT	0.1	2	-0.5	5	50000	39858	41008	42329	43980	45501	0.7972	0.8202	0.8466	0.8796	0.91
GT	RUTH-LRT	0.1	2	-0.1	5	50000	12080	15880	21696	30569	37963	0.2416	0.3176	0.4339	0.6114	0.7593
GT	RUTH-LRT	0.1	2	-0.05	5	50000	2815	5205	8668	13206	17790	0.0563	0.1041	0.1734	0.2641	0.3558
GT	RUTH-LRT	0.1	2	-0.01	5	50000	439	1420	4188	11237	20739	0.0088	0.0284	0.0838	0.2247	0.4148
GT	RUTH-LRT	0.1	2	0	5	50000	803	2328	6042	14139	23446	0.0161	0.0466	0.1208	0.2828	0.4689
GT	RUTH-LRT	0.1	2	0.01	5	50000	1982	4714	9880	18360	26220	0.0396	0.0943	0.1976	0.3672	0.5244
GT	RUTH-LRT	0.1	2	0.05	5	50000	18062	22800	26556	29335	31648	0.3612	0.456	0.5311	0.5867	0.633
GT	RUTH-LRT	0.1	2	0.1	5	50000	30026	31589	33919	37203	40154	0.6005	0.6318	0.6784	0.7441	0.8031
GT	RUTH-LRT	0.1	2	0.5	5	50000	48441	48637	48825	48992	49092	0.9688	0.9727	0.9765	0.9798	0.9818
GT	RUTH-LRT	0.1	5	-0.5	5	50000	35333	36620	38308	40662	42830	0.7067	0.7324	0.7662	0.8132	0.8566
GT	RUTH-LRT	0.1	5	-0.1	5	50000	9214	12756	18429	27420	35289	0.1843	0.2551	0.3686	0.5484	0.7058
GT	RUTH-LRT	0.1	5	-0.05	5	50000	2387	4367	7360	11761	16274	0.0477	0.0873	0.1472	0.2352	0.3255
GT	RUTH-LRT	0.1	5	-0.01	5	50000	460	1396	4176	11269	20626	0.0092	0.0279	0.0835	0.2254	0.4125
GT	RUTH-LRT	0.1	5	0	5	50000	830	2349	6177	14547	23780	0.0166	0.047	0.1235	0.2909	0.4756
GT	RUTH-LRT	0.1	5	0.01	5	50000	1897	4516	9805	18589	26594	0.0379	0.0903	0.1961	0.3718	0.5319
GT	RUTH-LRT	0.1	5	0.05	5	50000	17488	22245	26135	29037	31300	0.3498	0.4449	0.5227	0.5807	0.626
GT	RUTH-LRT	0.1	5	0.1	5	50000	29490	30791	32777	35807	38686	0.5898	0.6158	0.6555	0.7161	0.7737
GT	RUTH-LRT	0.1	5	0.5	5	50000	48091	48390	48660	48927	49116	0.9618	0.9678	0.9732	0.9785	0.9823
GT	RUTH-LRT	0.1	10	-0.5	5	50000	32210	33497	35310	37925	40637	0.6442	0.6699	0.7062	0.7585	0.8127
GT	RUTH-LRT	0.1	10	-0.1	5	50000	8190	11523	16886	25692	33820	0.1638	0.2305	0.3377	0.5138	0.6764
GT	RUTH-LRT	0.1	10	-0.05	5	50000	2099	3848	6629	10828	15343	0.042	0.077	0.1326	0.2166	0.3069
GT	RUTH-LRT	0.1	10	-0.01	5	50000	474	1385	4028	10885	20054	0.0095	0.0277	0.0806	0.2177	0.4011
GT	RUTH-LRT	0.1	10	0	5	50000	713	2127	5836	14030	23437	0.0143	0.0425	0.1167	0.2806	0.4687
GT	RUTH-LRT	0.1	10	0.01	5	50000	1717	4245	9344	18237	26518	0.0343	0.0849	0.1869	0.3647	0.5304
GT	RUTH-LRT	0.1	10	0.05	5	50000	16989	21836	25909	28942	31252	0.3398	0.4367	0.5182	0.5788	0.625
GT	RUTH-LRT	0.1	10	0.1	5	50000	29428	30690	32563	35518	38262	0.5886	0.6138	0.6513	0.7104	0.7652
GT	RUTH-LRT	0.1	10	0.5	5	50000	47919	48229	48558	48864	49061	0.9584	0.9646	0.9712	0.9773	0.9812
GT	RUTH-LRT	Combined	1	-0.5	5	250000	217251	221598	226530	230844	235411	0.869	0.8864	0.9061	0.9234	0.9416
GT	RUTH-LRT	Combined	1	-0.1	5	250000	76908	95062	122659	162559	196936	0.3076	0.3802	0.4906	0.6502	0.7877
GT	RUTH-LRT	Combined	1	-0.05	5	250000	16861	31408	52060	75064	96344	0.0674	0.1256	0.2082	0.3003	0.3854
GT	RUTH-LRT	Combined	1	-0.01	5	250000	2473	7725	22974	60747	110022	0.0099	0.0309	0.0919	0.243	0.4401
GT	RUTH-LRT	Combined	1	0	5	250000	5155	14055	34556	76537	122618	0.0206	0.0562	0.1382	0.3061	0.4905
GT	RUTH-LRT	Combined	1	0.01	5	250000	13160	28666	56099	97529	134266	0.0526	0.1147	0.2244	0.3901	0.5371
GT	RUTH-LRT	Combined	1	0.05	5	250000	98979	120106	136244	148761	160376	0.3959	0.4804	0.545	0.595	0.6415
GT	RUTH-LRT	Combined	1	0.1	5	250000	153730	162510	175309	192696	207880	0.6149	0.65	0.7012	0.7708	0.8315
GT	RUTH-LRT	Combined	1	0.5	5	250000	242613	243412	244243	245006	245500	0.9705	0.9736	0.977	0.98	0.982
GT	RUTH-LRT	0.01	1	-0.5	30	50000	45345	45901	46463	47190	47826	0.9069	0.918	0.9293	0.9438	0.9565
GT	RUTH-LRT	0.01	1	-0.1	30	50000	45215	45835	46439	47206	47834	0.9043	0.9167	0.9288	0.9441	0.9567
GT	RUTH-LRT	0.01	1	-0.05	30	50000	11671	20556	31344	41350	45956	0.2334	0.4111	0.6269	0.827	0.9191
GT	RUTH-LRT	0.01	1	-0.01	30	50000	13	81	540	2647	7886	0.0003	0.0016	0.0108	0.0529	0.1577
GT	RUTH-LRT	0.01	1	0	30	50000	1	6	89	723	3251	0	0.0001	0.0018	0.0145	0.065
GT	RUTH-LRT	0.01	1	0.01	30	50000	2	17	146	905	3579	0	0.0003	0.0029	0.0181	0.0716
GT	RUTH-LRT	0.01	1	0.05	30	50000	4532	9760	18962	31534	40083	0.0906	0.1952	0.3792	0.6307	0.8017
GT	RUTH-LRT	0.01	1	0.1	30	50000	43992	46219	47729	48653	49059	0.8798	0.9244	0.9546	0.9731	0.9812
GT	RUTH-LRT	0.01	1	0.5	30	50000	49477	49490	49507	49534	49588	0.9895	0.9898	0.9901	0.9907	0.9918
GT	RUTH-LRT	0.01	2	-0.5	30	50000	44571	45194	45865	46698	47443	0.8914	0.9039	0.9173	0.934	0.9489
GT	RUTH-LRT	0.01	2	-0.1	30	50000	44407	45191	45872	46701	47430	0.8881	0.9038	0.9174	0.934	0.9486
GT	RUTH-LRT	0.01	2	-0.05	30	50000	10933	19392	30128	40330	45326	0.2187	0.3878	0.6026	0.8066	0.9065
GT	RUTH-LRT	0.01	2	-0.01	30	50000	10	71	457	2537	7659	0.0002	0.0014	0.0091	0.0507	0.1532
GT	RUTH-LRT	0.01	2	0	30	50000	1	12	92	724	3215	0	0.0002	0.0018	0.0145	0.0643
GT	RUTH-LRT	0.01	2	0.01	30	50000	4	18	151	934	3835	0.0001	0.0004	0.003	0.0187	0.0767
GT	RUTH-LRT	0.01	2	0.05	30	50000	4694	10151	19279	31480	40041	0.0939	0.203	0.3856	0.6296	0.8008
GT	RUTH-LRT	0.01	2	0.1	30	50000	43759	45991	47513	48514	49032	0.8752	0.9198	0.9503	0.9703	0.9806
GT	RUTH-LRT	0.01	2	0.5	30	50000	49540	49576	49601	49625	49683	0.9908	0.9915	0.992	0.9925	0.9937
GT	RUTH-LRT	0.01	5	-0.5	30	50000	43833	44480	45223	46169	46965	0.8767	0.8896	0.9045	0.9234	0.9393
GT	RUTH-LRT	0.01	5	-0.1	30	50000	43598	44441	45192	46157	47004	0.872	0.8888	0.9038	0.9231	0.9401
GT	RUTH-LRT	0.01	5	-0.05	30	50000	10079	18462	29168	39633	44783	0.2016	0.3692	0.5834	0.7927	0.8957
GT	RUTH-LRT	0.01	5	-0.01	30	50000	17	80	490	2532	7664	0.0003	0.0016	0.0098	0.0506	0.1533
GT	RUTH-LRT	0.01	5	0	30	50000	1	11	92	742	3159	0	0.0002	0.0018	0.0148	0.0632
GT	RUTH-LRT	0.01	5	0.01	30	50000	2	22	145	1010	3821	0	0.0004	0.0029	0.0202	0.0764
GT	RUTH-LRT	0.01	5	0.05	30	50000	4578	9860	18781	31089	39569	0.0916	0.1972	0.3756	0.6218	0.7914
GT	RUTH-LRT	0.01	5	0.1	30	50000	43295	45696	47322	48472	49006	0.8659	0.9139	0.9464	0.9694	0.9801
GT	RUTH-LRT	0.01	5	0.5	30	50000	49665	49701	49733	49759	49807	0.9933	0.994	0.9947	0.9952	0.9961
[truncated: 314 more rows]
